# Supplementary material for: Single-Cell Expression Variability Implies Cell Function
Source: MDPI journal article supplement (doi:10.3390/cells9010014), 2019-12-19

Single-cell expression variability implies cell function

Daniel Osorio<sup>1, #</sup>, Xue Yu<sup>2, #</sup>, Yan Zhong<sup>3, #</sup>, Guanxun Li<sup>3</sup>, Peng Yu<sup>4</sup>, Erchin Serpedin<sup>4</sup>, Jianhua Huang<sup>3, \*</sup>, James J. Cai<sup>1, 4, 5, \*</sup>

<sup>1</sup>Department of Veterinary Integrative Biosciences; <sup>2</sup>Department of Veterinary Pathobiology; <sup>3</sup>Department of Statistics; <sup>4</sup>Department of Electrical and Computer Engineering; <sup>5</sup>Interdisciplinary Program of Genetics; Texas A&M University, College Station, TX 77843, USA.

<sup>#</sup>These authors contributed equally to this work.

<sup>\*</sup>Corresponding authors: JH (jianhua@stat.tamu.edu) and JJC (jcai@tamu.edu)

Supplementary Figures

Supplementary Fig. S1. Flowchart of selection of a highly homogeneous population of cells..... 2

Supplementary Fig. S2. UMAP embedding plots for the 1,000 selected cells of each of three cell types..... 3

Supplementary Fig. S3. Scatter plots between mean and residual CV<sup>2</sup>. .... 4

Supplementary Fig. S4. Comparison between two methods: HVG (Brennecke et al. 2013) and VEG (Chen et al. 2016), for correcting mean-variance dependency. .... 5

Supplementary Fig. S5. Venn diagram showing overlap between HVGs identified in three cell types..... 6

Supplementary Fig. S6. Correlation between scEV and population-level expression variability across genes of functional sets. ....7

Supplementary Fig. S7. The relationship between CV<sup>2</sup> and mean expression of genes in human iPSCs. .... 9

Supplementary Fig. S8. PHATE 3-D embedding plot for cells colored according to IGLC2 expression level in cells. ....10

*Supplementary Fig. S1. Flowchart of selection of a highly homogeneous population of cells.*

Supplementary Fig. S1. Flowchart of selection of a highly homogeneous population of cells.

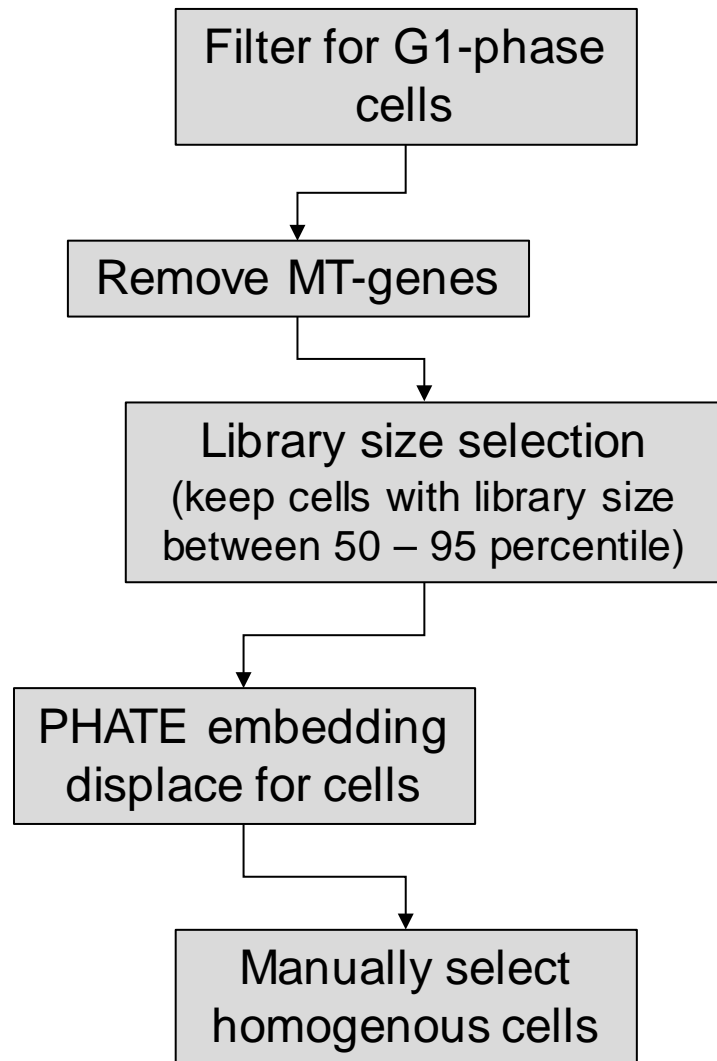

*Supplementary Fig. S2. UMAP embedding plots for the 1,000 selected cells of each of three cell types.*

Supplementary Fig. S2. UMAP embedding plots for the 1,000 selected cells of each of three cell types.

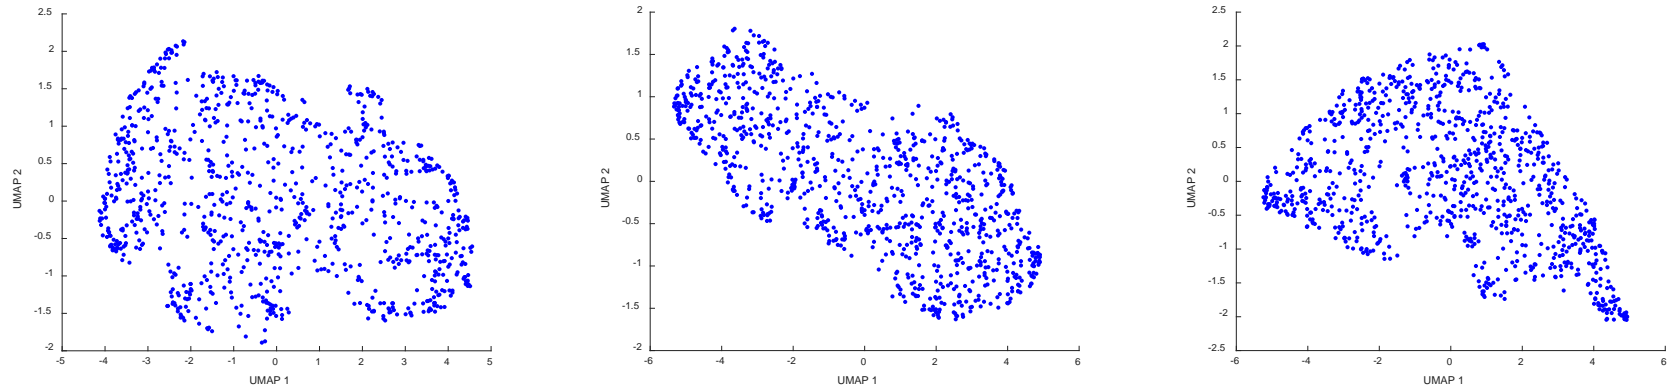

*Supplementary Fig. S3. Scatter plots between mean and residual CV<sup>2</sup>.*

**Supplementary Fig. S3. Scatter plots between mean and residual CV<sup>2</sup>.**

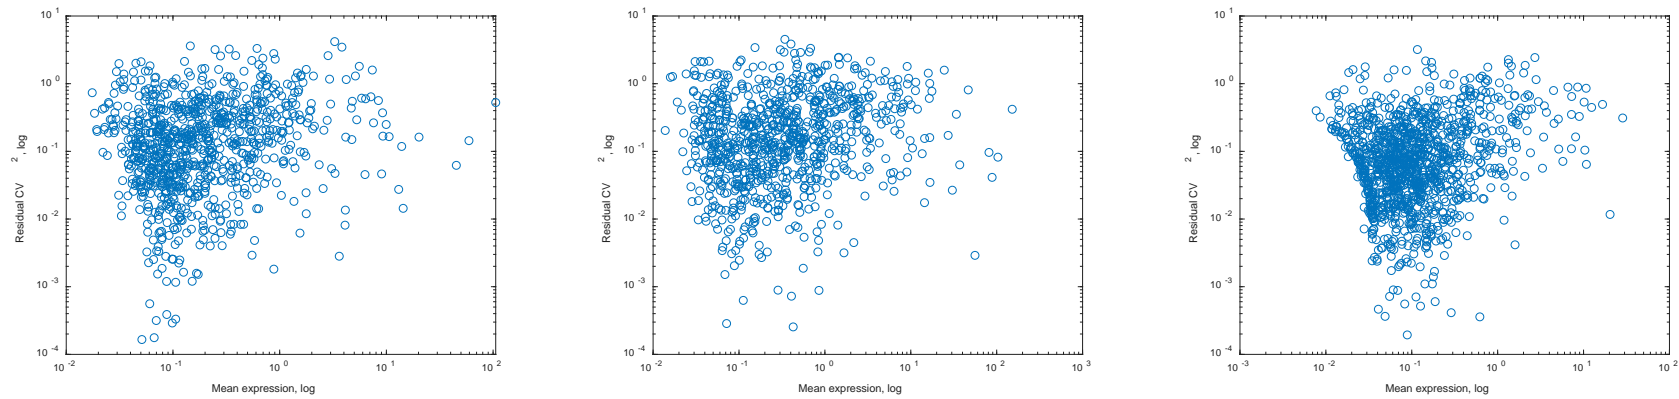

*Supplementary Fig. S4. Comparison between two methods: HVG (Brennecke et al. 2013) and VEG (Chen et al. 2016), for correcting mean-variance dependency.*

Supplementary Fig. S4. Comparison between two methods: HVG (Brennecke et al. 2013) and VEG (Chen et al. 2016), for correcting mean-variance dependency.

For each cell type, the numbers in parentheses are numbers of HVGs identified using the two methods and the number of overlap genes.

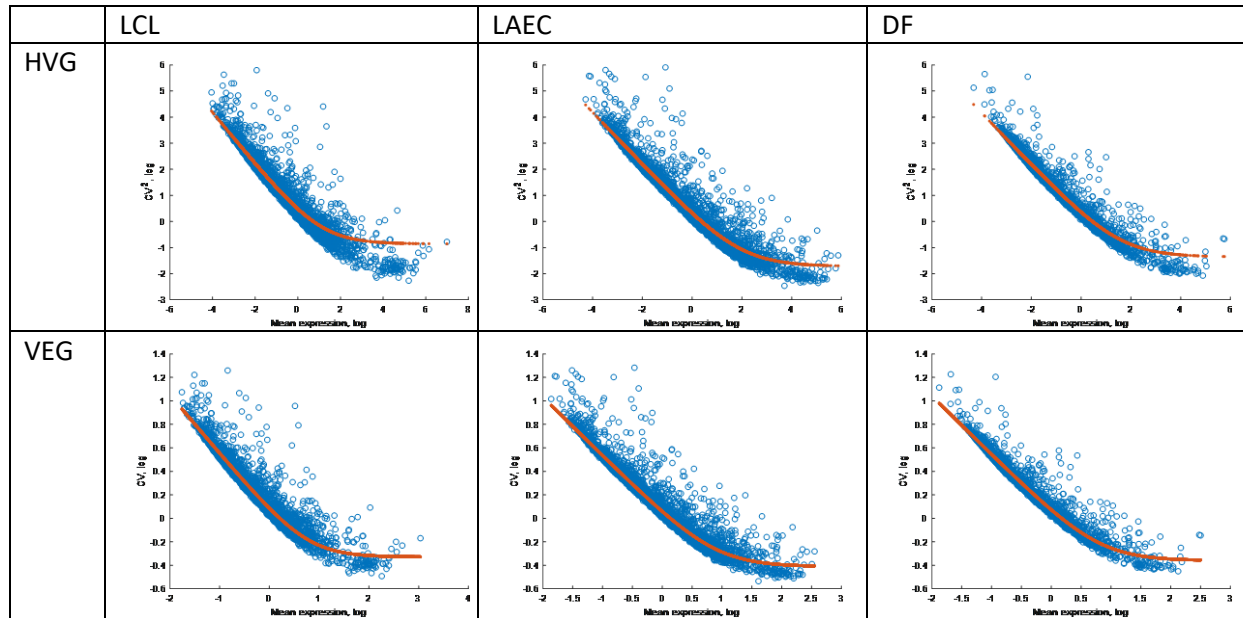

*Supplementary Fig. S5. Venn diagram showing overlap between HVGs identified in three cell types.*

**Supplementary Fig. S5. Venn diagram showing overlap between HVGs identified in three cell types.**

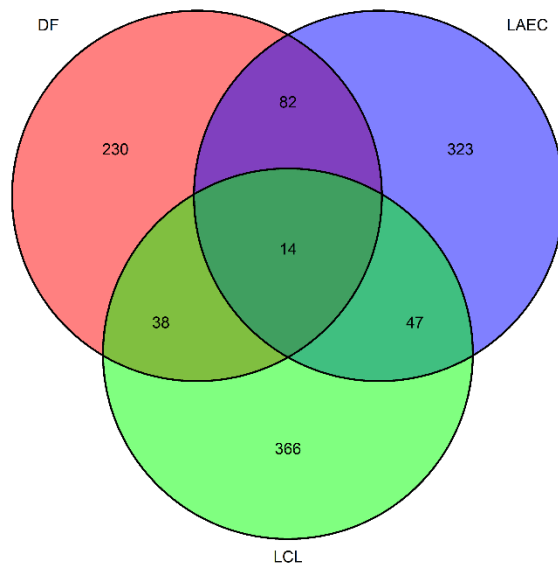



*Supplementary Fig. S6. Correlation between scEV and population-level expression variability across genes of functional sets.*

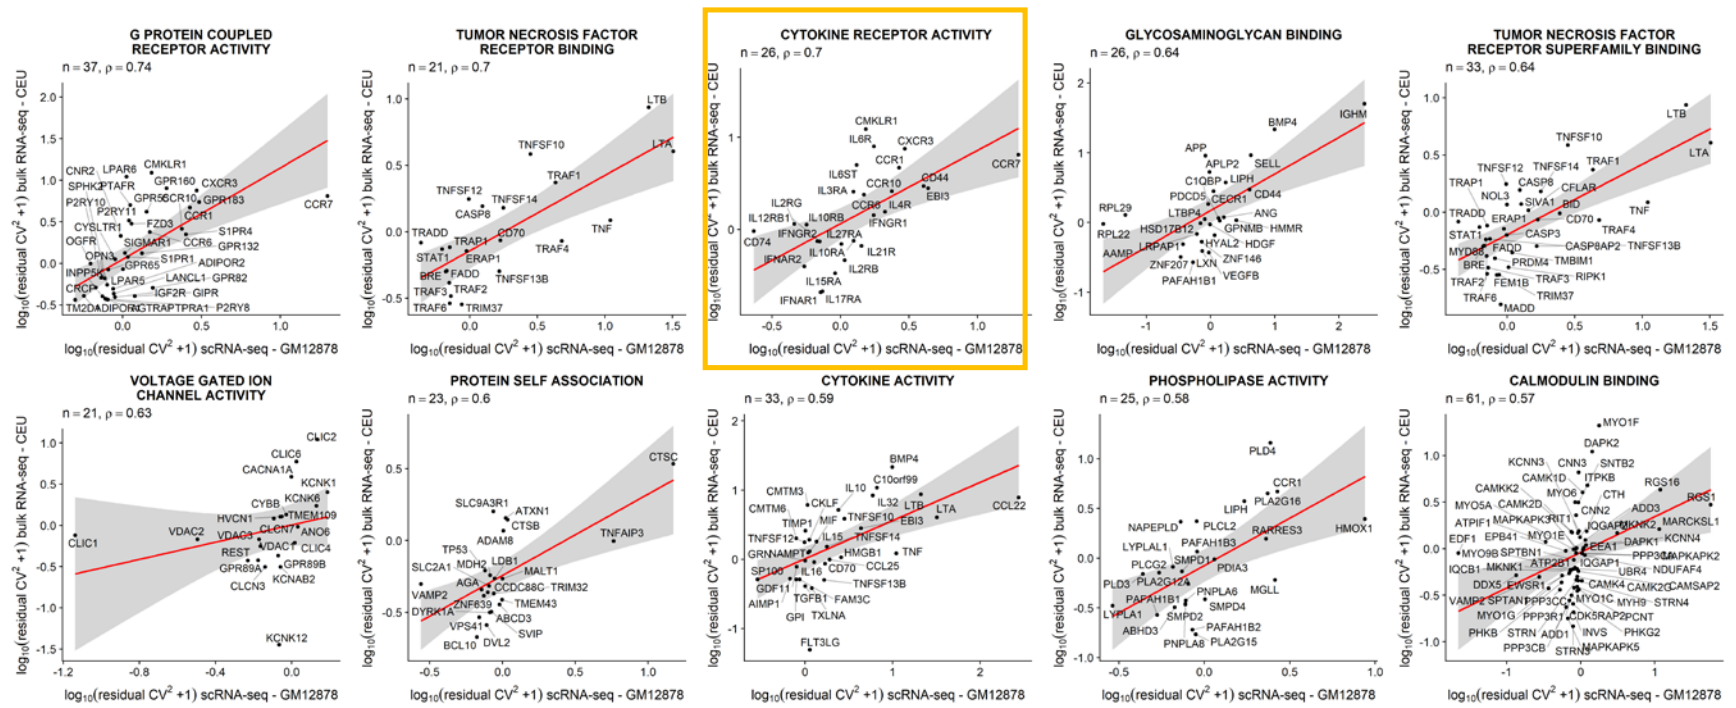

*Supplementary Fig. S7. The relationship between CV2 and mean expression of genes in human iPSCs.*

Supplementary Fig. S7. The relationship between CV2 and mean expression of genes in human iPSCs.

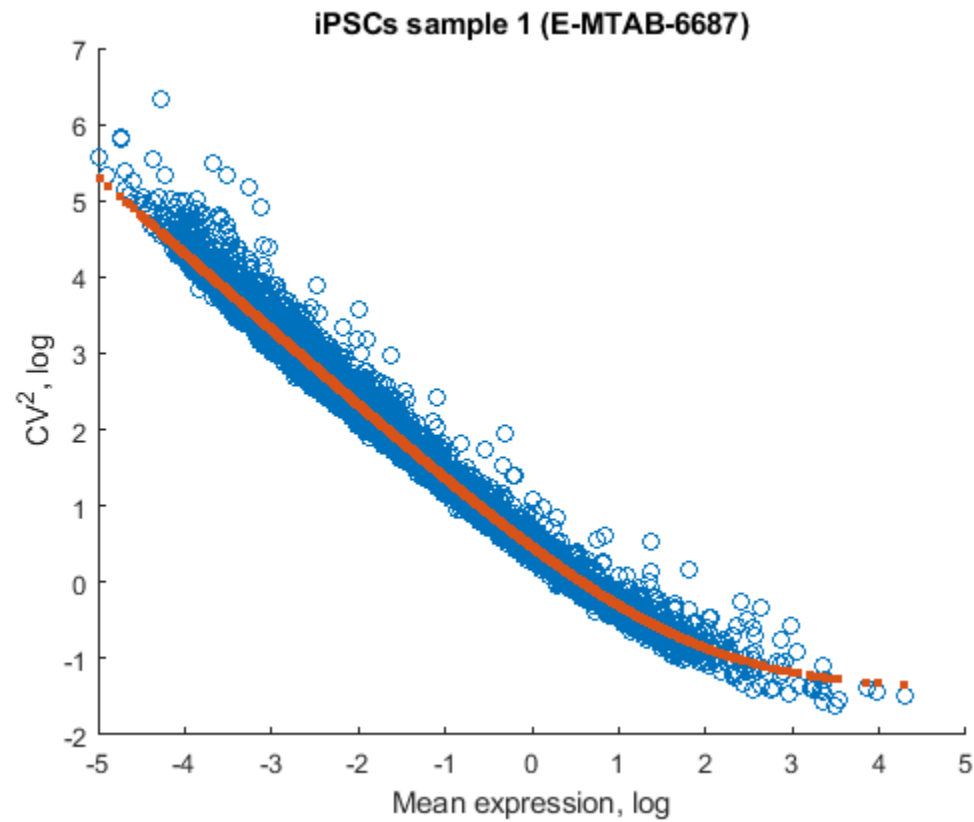

*Supplementary Fig. S8. PHATE 3-D embedding plot for cells colored according to IGLC2 expression level in cells.*

Supplementary Fig. S8. PHATE 3-D embedding plot for cells colored according to IGLC2 expression level in cells.

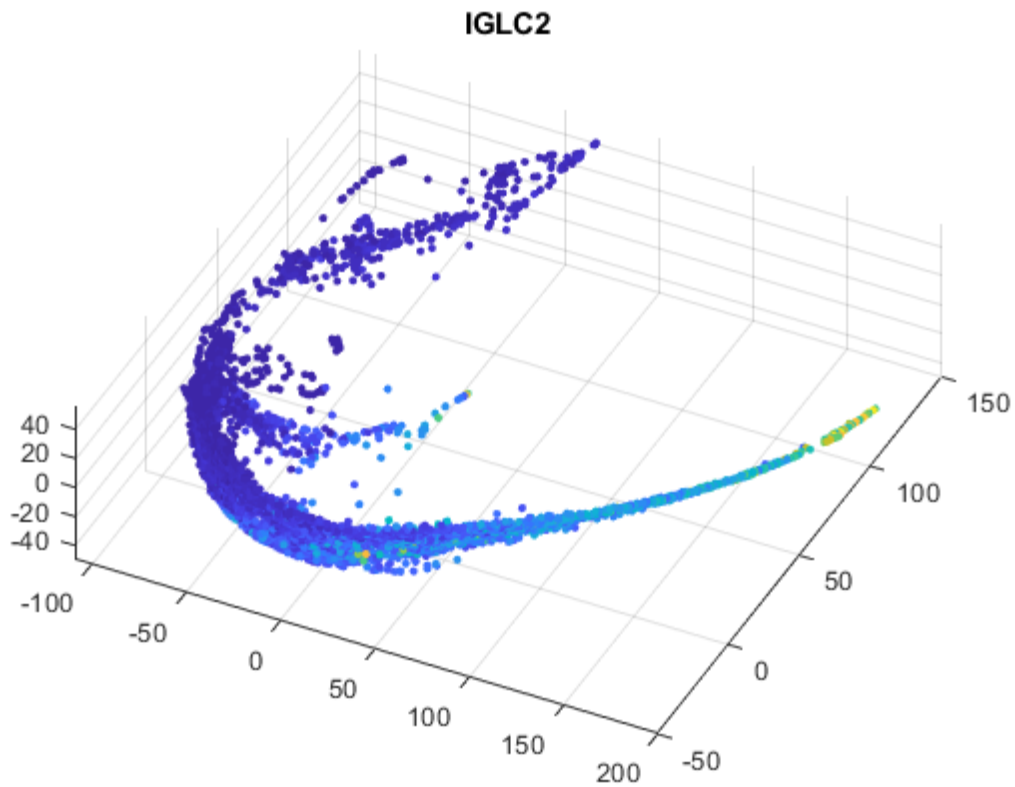

Supplement: s1 [file s1]
