# Supplementary material for: Single-Cell Expression Variability Implies Cell Function
Source: MDPI journal article supplement (doi:10.3390/cells9010014), 2019-12-19
Supplement: s1 [file s1]

Single-cell expression variability implies cell function

Daniel Osorio<sup>1,#</sup>, Xue Yu<sup>2,#</sup>, Yan Zhong<sup>3,#</sup>, Guanxun Li<sup>3</sup>, Peng Yu<sup>4</sup>, Erchin Serpedin<sup>4</sup>, Jianhua Huang<sup>3,\*</sup>, James J. Cai<sup>1,4,5,\*</sup>

<sup>1</sup>Department of Veterinary Integrative Biosciences; <sup>2</sup>Department of Veterinary Pathobiology; <sup>3</sup>Department of Statistics; <sup>4</sup>Department of Electrical and Computer Engineering; <sup>5</sup>Interdisciplinary Program of Genetics; Texas A&M University, College Station, TX 77843, USA.

<sup>#</sup>These authors contributed equally to this work.

<sup>\*</sup>Corresponding authors: JH (jianhua@stat.tamu.edu) and JJC (jcai@tamu.edu)

Supplementary Tables

Supplementary Table S1. HVGs of lymphoblastoid cell line (LCL) cells (FDR<0.01)..... 2

Supplementary Table S2. HVGs of lung airway epithelial cells (LAECs) (FDR<0.01). ....13

Supplementary Table S3. HVGs of dermal fibroblasts (DFs) (FDR<0.01)..... 24

Supplementary Table S4. Significantly enriched motifs found in HVGs. .... 33

Supplementary Table S5. HVGs of induced pluripotent stem cell (iPSCs) (FDR<0.01) ..... 34

Supplementary Table S1. HVGs of lymphoblastoid cell line (LCL) cells (FDR<0.01).

**Supplementary Table S1. HVGs of lymphoblastoid cell line (LCL) cells (FDR<0.01).**

| id | genes     | u        | cv2      | residualcv2 | ftratio  | pval      | fdr       |
|----|-----------|----------|----------|-------------|----------|-----------|-----------|
| 1  | IGKC      | 3.279132 | 81.83502 | 4.185526    | 65.72806 | 0         | 0         |
| 2  | WFDC2     | 0.145432 | 328.9569 | 3.611274    | 37.01318 | 0         | 0         |
| 3  | IGHM      | 3.83006  | 38.27298 | 3.467405    | 32.05346 | 0         | 0         |
| 4  | CCL4      | 0.613502 | 76.75264 | 3.315936    | 27.54818 | 0         | 0         |
| 5  | CCL22     | 0.336603 | 112.033  | 3.249625    | 25.78067 | 0         | 0         |
| 6  | CCL4L2    | 0.248003 | 135.3981 | 3.189026    | 24.26478 | 0         | 0         |
| 7  | IGHG1     | 0.879858 | 35.99707 | 2.789436    | 16.27184 | 0         | 0         |
| 8  | RGS1      | 0.386765 | 52.73496 | 2.604946    | 13.5305  | 0         | 0         |
| 9  | CCL3      | 2.841433 | 17.42626 | 2.595852    | 13.40801 | 0         | 0         |
| 10 | CCL3L3    | 0.279217 | 65.97229 | 2.568705    | 13.04892 | 0         | 0         |
| 11 | BIN1      | 0.696029 | 27.70819 | 2.381194    | 10.81781 | 0         | 0         |
| 12 | LINC00176 | 0.90831  | 21.68926 | 2.30171     | 9.991251 | 0         | 0         |
| 13 | CD69      | 0.548075 | 27.29328 | 2.203893    | 9.060216 | 0         | 0         |
| 14 | CYP1B1    | 0.128323 | 83.99067 | 2.13275     | 8.438037 | 0         | 0         |
| 15 | KCNMA1    | 0.050237 | 198.4927 | 2.110967    | 8.256225 | 0         | 0         |
| 16 | PRSS2     | 0.044945 | 198.6256 | 2.004232    | 7.420392 | 0         | 0         |
| 17 | CD7       | 0.031185 | 277.0247 | 1.981667    | 7.254825 | 0         | 0         |
| 18 | IGHG3     | 0.637732 | 18.46284 | 1.9173      | 6.802569 | 0         | 0         |
| 19 | ATF3      | 0.060945 | 124.9399 | 1.833405    | 6.255147 | 0         | 0         |
| 20 | HIST1H1C  | 5.572301 | 6.692024 | 1.806432    | 6.088682 | 0         | 0         |
| 21 | ITM2A     | 0.688372 | 14.19716 | 1.705278    | 5.502913 | 0         | 0         |
| 22 | CAMP      | 0.198917 | 36.10813 | 1.678864    | 5.359464 | 0         | 0         |
| 23 | DHRS9     | 0.18633  | 37.35663 | 1.655887    | 5.237722 | 0         | 0         |
| 24 | CCR7      | 1.774538 | 7.845156 | 1.624366    | 5.075202 | 0         | 0         |
| 25 | LTA       | 0.267946 | 26.48256 | 1.621888    | 5.062638 | 0         | 0         |
| 26 | LTB       | 7.381157 | 5.143045 | 1.590816    | 4.907754 | 0         | 0         |
| 27 | LINC01588 | 0.058874 | 96.39689 | 1.540991    | 4.669217 | 0         | 0         |
| 28 | TNFAIP2   | 0.055105 | 102.0179 | 1.534266    | 4.637921 | 0         | 0         |
| 29 | CD83      | 0.46288  | 15.67753 | 1.52757     | 4.606966 | 0         | 0         |
| 30 | RGS2      | 0.02954  | 181.5317 | 1.506009    | 4.5087   | 0         | 0         |
| 31 | SFN       | 0.042664 | 124.2037 | 1.484344    | 4.412069 | 0         | 0         |
| 32 | MAL       | 0.139676 | 40.37007 | 1.477027    | 4.379904 | 0         | 0         |
| 33 | DUSP2     | 1.468837 | 7.071851 | 1.436027    | 4.203959 | 0         | 0         |
| 34 | PMCH      | 0.034682 | 137.8805 | 1.387602    | 4.005235 | 0         | 0         |
| 35 | LMNA      | 0.693606 | 10.00946 | 1.36072     | 3.898999 | 0         | 0         |
| 36 | ANKRD37   | 1.588458 | 6.187685 | 1.338556    | 3.813533 | 6.91e-323 | 1.55e-320 |
| 37 | BMP4      | 0.145733 | 32.63714 | 1.30266     | 3.67907  | 1.73E-301 | 3.80E-299 |
| 38 | CTSC      | 5.127163 | 4.096594 | 1.299318    | 3.666797 | 1.51E-299 | 3.22E-297 |
| 39 | NFKBIA    | 2.071455 | 5.313563 | 1.297433    | 3.659889 | 1.86E-298 | 3.86E-296 |
| 40 | CDKN1A    | 1.573795 | 5.831791 | 1.275124    | 3.579144 | 9.08E-286 | 1.84E-283 |

*Supplementary Table S1. HVGs of lymphoblastoid cell line (LCL) cells (FDR<0.01).*

|    |               |          |          |          |          |           |           |
|----|---------------|----------|----------|----------|----------|-----------|-----------|
| 41 | RGS16         | 0.322842 | 16.02215 | 1.271473 | 3.5661   | 9.96E-284 | 1.96E-281 |
| 42 | MYC           | 0.662088 | 9.439371 | 1.271459 | 3.566053 | 1.01E-283 | 1.96E-281 |
| 43 | IER3          | 0.190097 | 24.94214 | 1.269428 | 3.558817 | 1.37E-282 | 2.58E-280 |
| 44 | FSCN1         | 0.345521 | 14.96179 | 1.257065 | 3.515091 | 8.85E-276 | 1.63E-273 |
| 45 | IFI27         | 0.069111 | 61.65962 | 1.246983 | 3.479827 | 2.60E-270 | 4.70E-268 |
| 46 | S100A4        | 0.77263  | 8.282655 | 1.240495 | 3.457324 | 7.83E-267 | 1.38E-264 |
| 47 | MIR155HG      | 1.409503 | 5.804966 | 1.218997 | 3.383793 | 1.57E-255 | 2.70E-253 |
| 48 | RP11-291B21.2 | 0.06744  | 61.24653 | 1.217002 | 3.377048 | 1.68E-254 | 2.85E-252 |
| 49 | MIER2         | 0.107068 | 38.38238 | 1.183488 | 3.265745 | 1.32E-237 | 2.19E-235 |
| 50 | TUBB4B        | 0.758929 | 7.812086 | 1.170724 | 3.224327 | 2.22E-231 | 3.60E-229 |
| 51 | HSPB1         | 2.934978 | 4.132356 | 1.16681  | 3.211732 | 1.70E-229 | 2.71E-227 |
| 52 | TUBA1B        | 4.204364 | 3.690298 | 1.151269 | 3.162204 | 4.11E-222 | 6.41E-220 |
| 53 | ENTPD2        | 0.03457  | 109.0478 | 1.149859 | 3.157747 | 1.89E-221 | 2.89E-219 |
| 54 | RSPH1         | 0.050121 | 74.62172 | 1.130425 | 3.096971 | 1.80E-212 | 2.71E-210 |
| 55 | DUSP4         | 0.186136 | 21.86224 | 1.119224 | 3.062478 | 2.07E-207 | 3.06E-205 |
| 56 | TIMD4         | 0.727041 | 7.534822 | 1.107223 | 3.025944 | 4.43E-202 | 6.41E-200 |
| 57 | FAM83D        | 0.04374  | 82.9143  | 1.104333 | 3.01721  | 8.23E-201 | 1.17E-198 |
| 58 | IL4I1         | 0.302539 | 13.97623 | 1.082447 | 2.951895 | 2.24E-191 | 3.14E-189 |
| 59 | RARRES2       | 0.032028 | 107.9551 | 1.065316 | 2.901757 | 3.33E-184 | 4.58E-182 |
| 60 | PLK3          | 0.099306 | 36.12493 | 1.053114 | 2.866564 | 3.30E-179 | 4.46E-177 |
| 61 | MARCKSL1      | 1.653733 | 4.523364 | 1.043223 | 2.838351 | 3.16E-175 | 4.20E-173 |
| 62 | MACROD2       | 0.37391  | 11.24497 | 1.033409 | 2.81063  | 2.46E-171 | 3.21E-169 |
| 63 | ATP1B1        | 0.067846 | 49.24275 | 1.004572 | 2.730739 | 3.06E-160 | 3.94E-158 |
| 64 | SGK1          | 0.083907 | 40.25531 | 1.003899 | 2.728902 | 5.47E-160 | 6.94E-158 |
| 65 | TNF           | 0.232107 | 16.02188 | 0.9988   | 2.715022 | 4.43E-158 | 5.53E-156 |
| 66 | C10orf99      | 0.100097 | 33.59288 | 0.987821 | 2.685377 | 5.05E-154 | 6.21E-152 |
| 67 | LINC01480     | 1.180651 | 5.030214 | 0.986607 | 2.682118 | 1.40E-153 | 1.70E-151 |
| 68 | IGLV6-57      | 0.364215 | 10.85912 | 0.978009 | 2.659158 | 1.86E-150 | 2.22E-148 |
| 69 | HMOX1         | 0.652307 | 7.096395 | 0.976255 | 2.654497 | 7.96E-150 | 9.36E-148 |
| 70 | IL32          | 0.128028 | 26.16786 | 0.964484 | 2.623433 | 1.24E-145 | 1.44E-143 |
| 71 | BATF          | 0.915177 | 5.665865 | 0.963788 | 2.621608 | 2.19E-145 | 2.50E-143 |
| 72 | STEAP1        | 0.028884 | 106.7261 | 0.952881 | 2.59317  | 1.41E-141 | 1.59E-139 |
| 73 | INSIG1        | 0.747742 | 6.33211  | 0.951267 | 2.588988 | 5.11E-141 | 5.68E-139 |
| 74 | EGR2          | 0.103258 | 31.40006 | 0.949158 | 2.583534 | 2.73E-140 | 2.99E-138 |
| 75 | AICDA         | 0.760627 | 6.219602 | 0.944171 | 2.570682 | 1.40E-138 | 1.51E-136 |
| 76 | HMGB2         | 1.294716 | 4.568666 | 0.937745 | 2.554216 | 2.13E-136 | 2.27E-134 |
| 77 | S100A10       | 0.217619 | 15.88443 | 0.935194 | 2.547709 | 1.54E-135 | 1.63E-133 |
| 78 | LGALS14       | 0.458972 | 8.518501 | 0.911315 | 2.487591 | 1.17E-127 | 1.21E-125 |
| 79 | NPIP15        | 0.082273 | 36.99746 | 0.901016 | 2.462103 | 2.34E-124 | 2.40E-122 |
| 80 | PRKCDBP       | 0.034718 | 83.96069 | 0.892571 | 2.441398 | 1.08E-121 | 1.10E-119 |
| 81 | ANXA1         | 0.121821 | 25.18031 | 0.880649 | 2.412465 | 5.42E-118 | 5.43E-116 |
| 82 | CLC           | 0.041854 | 69.08249 | 0.879142 | 2.408831 | 1.57E-117 | 1.55E-115 |
| 83 | RP5-887A10.1  | 0.867276 | 5.284174 | 0.862083 | 2.368089 | 2.22E-112 | 2.17E-110 |

*Supplementary Table S1. HVGs of lymphoblastoid cell line (LCL) cells (FDR<0.01).*

|     |              |          |          |          |          |           |           |
|-----|--------------|----------|----------|----------|----------|-----------|-----------|
| 84  | BCL2A1       | 0.630299 | 6.444295 | 0.856842 | 2.35571  | 7.92E-111 | 7.65E-109 |
| 85  | TNFRSF18     | 0.059105 | 47.90335 | 0.845448 | 2.329021 | 1.68E-107 | 1.60E-105 |
| 86  | GPR34        | 0.070685 | 39.89794 | 0.833053 | 2.300332 | 5.88E-104 | 5.55E-102 |
| 87  | ID1          | 0.034407 | 79.10255 | 0.824199 | 2.280053 | 1.80E-101 | 1.68E-99  |
| 88  | STAG3        | 0.586888 | 6.543555 | 0.82344  | 2.278323 | 2.92E-101 | 2.69E-99  |
| 89  | HES1         | 0.064485 | 42.71778 | 0.814068 | 2.25707  | 1.12E-98  | 1.02E-96  |
| 90  | ZFP36L1      | 1.507996 | 3.737536 | 0.81063  | 2.249324 | 9.72E-98  | 8.76E-96  |
| 91  | HEY1         | 0.054765 | 49.16239 | 0.798318 | 2.221801 | 1.98E-94  | 1.77E-92  |
| 92  | NAALADL2-AS2 | 0.173094 | 16.67251 | 0.784356 | 2.190995 | 9.16E-91  | 8.08E-89  |
| 93  | B4GALT1      | 0.985705 | 4.522424 | 0.78136  | 2.184442 | 5.45E-90  | 4.75E-88  |
| 94  | CXCR4        | 0.055106 | 46.7748  | 0.754478 | 2.1265   | 3.13E-83  | 2.70E-81  |
| 95  | STMN1        | 1.487363 | 3.543647 | 0.750941 | 2.118993 | 2.29E-82  | 1.96E-80  |
| 96  | PHGDH        | 0.207348 | 13.74494 | 0.748943 | 2.114763 | 7.01E-82  | 5.92E-80  |
| 97  | ID2          | 0.398587 | 8.000331 | 0.7423   | 2.100761 | 2.80E-80  | 2.34E-78  |
| 98  | JUNB         | 1.379893 | 3.631655 | 0.739704 | 2.095315 | 1.17E-79  | 9.68E-78  |
| 99  | T            | 0.017515 | 140.4125 | 0.735502 | 2.086529 | 1.16E-78  | 9.53E-77  |
| 100 | EGR3         | 0.028054 | 86.98154 | 0.719775 | 2.05397  | 5.37E-75  | 4.36E-73  |
| 101 | BIRC3        | 0.763761 | 4.931221 | 0.714648 | 2.043468 | 7.95E-74  | 6.39E-72  |
| 102 | ICAM1        | 0.158202 | 16.76304 | 0.709931 | 2.03385  | 9.28E-73  | 7.38E-71  |
| 103 | TCL1A        | 0.919032 | 4.37611  | 0.707958 | 2.029842 | 2.58E-72  | 2.03E-70  |
| 104 | CHAC1        | 0.088846 | 28.31453 | 0.705677 | 2.025217 | 8.34E-72  | 6.51E-70  |
| 105 | SOCS3        | 0.068952 | 35.86295 | 0.702881 | 2.019562 | 3.50E-71  | 2.70E-69  |
| 106 | SOX4         | 0.364761 | 8.227901 | 0.701705 | 2.017189 | 6.38E-71  | 4.88E-69  |
| 107 | GZMH         | 0.064235 | 38.22001 | 0.699103 | 2.011946 | 2.40E-70  | 1.82E-68  |
| 108 | FRMD4A       | 0.388751 | 7.756317 | 0.692124 | 1.997954 | 8.07E-69  | 6.06E-67  |
| 109 | ABCB9        | 0.14963  | 17.29215 | 0.691171 | 1.996052 | 1.30E-68  | 9.67E-67  |
| 110 | CEBPD        | 0.083832 | 29.30821 | 0.685677 | 1.985115 | 1.99E-67  | 1.47E-65  |
| 111 | DUSP11       | 0.588895 | 5.684222 | 0.685008 | 1.983787 | 2.77E-67  | 2.03E-65  |
| 112 | NFKBID       | 0.131666 | 19.17556 | 0.679074 | 1.972052 | 5.09E-66  | 3.69E-64  |
| 113 | SELL         | 0.612654 | 5.493063 | 0.677893 | 1.969724 | 9.04E-66  | 6.49E-64  |
| 114 | JUN          | 0.274586 | 10.08388 | 0.676611 | 1.9672   | 1.69E-65  | 1.20E-63  |
| 115 | TRAF1        | 0.195168 | 13.28034 | 0.662095 | 1.93885  | 1.74E-62  | 1.23E-60  |
| 116 | CYS1         | 0.048282 | 48.38157 | 0.661089 | 1.9369   | 2.79E-62  | 1.95E-60  |
| 117 | PSAT1        | 0.300337 | 9.211261 | 0.659581 | 1.933982 | 5.67E-62  | 3.93E-60  |
| 118 | CHI3L2       | 1.043576 | 3.877033 | 0.659498 | 1.933822 | 5.89E-62  | 4.05E-60  |
| 119 | COCH         | 0.276512 | 9.750708 | 0.648785 | 1.913214 | 8.44E-60  | 5.75E-58  |
| 120 | NAALADL2     | 0.066898 | 34.9208  | 0.647502 | 1.910762 | 1.52E-59  | 1.03E-57  |
| 121 | C1orf162     | 0.05587  | 41.27384 | 0.642583 | 1.901385 | 1.42E-58  | 9.53E-57  |
| 122 | H2AFZ        | 7.158372 | 1.997749 | 0.640523 | 1.897474 | 3.60E-58  | 2.39E-56  |
| 123 | TUBB2A       | 0.076712 | 30.10846 | 0.628996 | 1.875726 | 6.08E-56  | 4.01E-54  |
| 124 | AQP3         | 0.178457 | 13.84027 | 0.625075 | 1.868386 | 3.38E-55  | 2.21E-53  |
| 125 | MT2A         | 0.819732 | 4.262495 | 0.612959 | 1.845885 | 6.21E-53  | 4.03E-51  |
| 126 | HERPUD1      | 5.862162 | 2.006135 | 0.611159 | 1.842567 | 1.33E-52  | 8.58E-51  |

*Supplementary Table S1. HVGs of lymphoblastoid cell line (LCL) cells (FDR<0.01).*

|     |              |          |          |          |          |          |          |
|-----|--------------|----------|----------|----------|----------|----------|----------|
| 127 | PTTG1        | 1.32013  | 3.263185 | 0.610943 | 1.842168 | 1.46E-52 | 9.33E-51 |
| 128 | CCL5         | 0.271863 | 9.502606 | 0.608996 | 1.838585 | 3.32E-52 | 2.10E-50 |
| 129 | CD24         | 0.182669 | 13.31199 | 0.606653 | 1.834282 | 8.88E-52 | 5.59E-50 |
| 130 | TNFAIP3      | 0.197931 | 12.34135 | 0.600985 | 1.823914 | 9.40E-51 | 5.87E-49 |
| 131 | VIM          | 6.387519 | 1.949397 | 0.59757  | 1.817697 | 3.84E-50 | 2.38E-48 |
| 132 | GADD45A      | 0.25067  | 10.02283 | 0.594656 | 1.812408 | 1.27E-49 | 7.78E-48 |
| 133 | IFIT1        | 0.489237 | 5.921364 | 0.594499 | 1.812123 | 1.35E-49 | 8.24E-48 |
| 134 | VPREB3       | 0.216376 | 11.29908 | 0.589665 | 1.803384 | 9.60E-49 | 5.81E-47 |
| 135 | EBI3         | 0.609183 | 4.978926 | 0.57575  | 1.778464 | 2.42E-46 | 1.45E-44 |
| 136 | PHLDA3       | 0.258031 | 9.557647 | 0.571356 | 1.770667 | 1.34E-45 | 7.97E-44 |
| 137 | HSPA5        | 8.422    | 1.806379 | 0.563253 | 1.756376 | 2.99E-44 | 1.77E-42 |
| 138 | STXBP6       | 0.054501 | 38.78829 | 0.556666 | 1.744846 | 3.59E-43 | 2.11E-41 |
| 139 | HAVCR2       | 0.060402 | 35.10514 | 0.555374 | 1.742592 | 5.82E-43 | 3.40E-41 |
| 140 | MS4A7        | 0.164012 | 13.90695 | 0.555249 | 1.742375 | 6.09E-43 | 3.53E-41 |
| 141 | NCALD        | 0.160436 | 14.12009 | 0.550849 | 1.734724 | 3.12E-42 | 1.80E-40 |
| 142 | CDC20        | 0.172901 | 13.1933  | 0.549319 | 1.732073 | 5.49E-42 | 3.14E-40 |
| 143 | PLAC8        | 4.792886 | 1.962381 | 0.549259 | 1.73197  | 5.61E-42 | 3.18E-40 |
| 144 | IFIT3        | 0.686568 | 4.458841 | 0.545405 | 1.725306 | 2.30E-41 | 1.30E-39 |
| 145 | LAMP5        | 0.312625 | 7.93308  | 0.542675 | 1.720604 | 6.21E-41 | 3.47E-39 |
| 146 | GADD45B      | 0.724297 | 4.284333 | 0.540222 | 1.716388 | 1.51E-40 | 8.37E-39 |
| 147 | ALOX5AP      | 0.612989 | 4.780059 | 0.539232 | 1.714689 | 2.15E-40 | 1.19E-38 |
| 148 | TK1          | 0.344248 | 7.296137 | 0.53599  | 1.70914  | 6.86E-40 | 3.76E-38 |
| 149 | C1orf54      | 0.065172 | 32.00274 | 0.535365 | 1.708072 | 8.58E-40 | 4.67E-38 |
| 150 | ACY3         | 0.175732 | 12.79252 | 0.5328   | 1.703696 | 2.13E-39 | 1.15E-37 |
| 151 | WDR91        | 0.116351 | 18.54178 | 0.532515 | 1.70321  | 2.36E-39 | 1.27E-37 |
| 152 | IL2RA        | 0.024912 | 80.65077 | 0.527782 | 1.695169 | 1.25E-38 | 6.65E-37 |
| 153 | CAV1         | 0.216287 | 10.62081 | 0.527405 | 1.694529 | 1.42E-38 | 7.54E-37 |
| 154 | DERL3        | 1.309743 | 3.009852 | 0.526194 | 1.692478 | 2.17E-38 | 1.14E-36 |
| 155 | FTL          | 105.8097 | 1.525237 | 0.525995 | 1.692142 | 2.32E-38 | 1.22E-36 |
| 156 | PIM3         | 0.337883 | 7.316136 | 0.523931 | 1.688653 | 4.76E-38 | 2.47E-36 |
| 157 | DDIT4        | 1.142262 | 3.200818 | 0.517052 | 1.677076 | 5.05E-37 | 2.61E-35 |
| 158 | PRKAR1B      | 0.20494  | 10.98053 | 0.514306 | 1.672477 | 1.28E-36 | 6.59E-35 |
| 159 | TRAF4        | 0.670467 | 4.379074 | 0.511735 | 1.668183 | 3.06E-36 | 1.56E-34 |
| 160 | SOCS1        | 0.657208 | 4.432823 | 0.510691 | 1.666442 | 4.34E-36 | 2.20E-34 |
| 161 | SLC25A4      | 1.979342 | 2.458911 | 0.509052 | 1.663713 | 7.51E-36 | 3.79E-34 |
| 162 | BIRC5        | 0.381354 | 6.552188 | 0.508578 | 1.662925 | 8.80E-36 | 4.41E-34 |
| 163 | ASB2         | 0.149661 | 14.35829 | 0.505427 | 1.657693 | 2.51E-35 | 1.25E-33 |
| 164 | LINC00158    | 0.076616 | 26.60064 | 0.503946 | 1.65524  | 4.09E-35 | 2.02E-33 |
| 165 | RP11-598F7.3 | 0.025176 | 77.81272 | 0.502301 | 1.652519 | 7.03E-35 | 3.46E-33 |
| 166 | FABP5        | 3.002173 | 2.105804 | 0.499577 | 1.648024 | 1.71E-34 | 8.38E-33 |
| 167 | CDKN2C       | 1.41632  | 2.791193 | 0.48907  | 1.630799 | 5.05E-33 | 2.45E-31 |
| 168 | CCNB1        | 0.153231 | 13.80474 | 0.487236 | 1.627811 | 9.02E-33 | 4.36E-31 |
| 169 | C16orf74     | 0.253173 | 8.923557 | 0.486813 | 1.627123 | 1.03E-32 | 4.95E-31 |

*Supplementary Table S1. HVGs of lymphoblastoid cell line (LCL) cells (FDR<0.01).*

|     |              |          |          |          |          |          |          |
|-----|--------------|----------|----------|----------|----------|----------|----------|
| 170 | RP11-166B2.1 | 0.106839 | 19.12912 | 0.485115 | 1.624362 | 1.76E-32 | 8.40E-31 |
| 171 | MGST1        | 0.523172 | 5.047482 | 0.48316  | 1.62119  | 3.25E-32 | 1.54E-30 |
| 172 | NINJ1        | 0.184756 | 11.64312 | 0.482659 | 1.620377 | 3.80E-32 | 1.79E-30 |
| 173 | PIM1         | 0.096864 | 20.8155  | 0.478676 | 1.613936 | 1.31E-31 | 6.15E-30 |
| 174 | CCR1         | 0.121371 | 16.89937 | 0.478481 | 1.613621 | 1.39E-31 | 6.50E-30 |
| 175 | S100A6       | 1.204257 | 2.988829 | 0.476375 | 1.610227 | 2.67E-31 | 1.24E-29 |
| 176 | UBE2S        | 1.144377 | 3.050675 | 0.469995 | 1.599986 | 1.86E-30 | 8.60E-29 |
| 177 | CLIC3        | 0.102744 | 19.51465 | 0.468895 | 1.598227 | 2.60E-30 | 1.19E-28 |
| 178 | LARP6        | 0.030293 | 62.67941 | 0.467226 | 1.595561 | 4.29E-30 | 1.96E-28 |
| 179 | RHOB         | 0.037854 | 50.16877 | 0.46175  | 1.586849 | 2.19E-29 | 9.95E-28 |
| 180 | ENDOD1       | 0.061682 | 31.27341 | 0.459815 | 1.58378  | 3.89E-29 | 1.75E-27 |
| 181 | NCF2         | 0.171829 | 12.10841 | 0.45802  | 1.580941 | 6.58E-29 | 2.95E-27 |
| 182 | DNASE1L3     | 0.110007 | 18.02134 | 0.452447 | 1.572155 | 3.32E-28 | 1.48E-26 |
| 183 | TNFSF10      | 0.270406 | 8.142165 | 0.450035 | 1.568366 | 6.65E-28 | 2.95E-26 |
| 184 | IGF1         | 0.239267 | 9.012927 | 0.449243 | 1.567126 | 8.35E-28 | 3.68E-26 |
| 185 | HRASLS2      | 0.494781 | 5.025736 | 0.438689 | 1.550673 | 1.64E-26 | 7.17E-25 |
| 186 | RHOV         | 0.022894 | 80.15174 | 0.438618 | 1.550564 | 1.67E-26 | 7.28E-25 |
| 187 | CENPF        | 0.101166 | 19.16418 | 0.436409 | 1.547141 | 3.08E-26 | 1.33E-24 |
| 188 | ETV7         | 0.161138 | 12.53508 | 0.43567  | 1.545999 | 3.77E-26 | 1.63E-24 |
| 189 | LDHA         | 4.687084 | 1.760075 | 0.435634 | 1.545944 | 3.81E-26 | 1.63E-24 |
| 190 | LMO2         | 0.073233 | 25.90068 | 0.434568 | 1.544296 | 5.11E-26 | 2.18E-24 |
| 191 | RASGRP2      | 0.456649 | 5.29038  | 0.431206 | 1.539113 | 1.28E-25 | 5.44E-24 |
| 192 | CLEC4C       | 0.077406 | 24.39077 | 0.426895 | 1.532492 | 4.11E-25 | 1.74E-23 |
| 193 | GBP2         | 0.155324 | 12.82726 | 0.425933 | 1.531018 | 5.32E-25 | 2.24E-23 |
| 194 | SPARC        | 0.119677 | 16.22031 | 0.424603 | 1.528984 | 7.59E-25 | 3.17E-23 |
| 195 | TRAC         | 1.003201 | 3.13008  | 0.42336  | 1.527084 | 1.06E-24 | 4.40E-23 |
| 196 | HHEX         | 0.231107 | 9.041972 | 0.423054 | 1.526616 | 1.15E-24 | 4.75E-23 |
| 197 | EGR1         | 0.047577 | 38.59595 | 0.420914 | 1.523354 | 2.02E-24 | 8.33E-23 |
| 198 | NPW          | 0.021841 | 82.43198 | 0.420402 | 1.522573 | 2.32E-24 | 9.49E-23 |
| 199 | IFI30        | 0.112906 | 17.01675 | 0.419054 | 1.520522 | 3.30E-24 | 1.35E-22 |
| 200 | MSL3         | 0.621533 | 4.1966   | 0.418454 | 1.51961  | 3.87E-24 | 1.57E-22 |
| 201 | NLRP7        | 0.081491 | 22.99596 | 0.41649  | 1.516629 | 6.46E-24 | 2.61E-22 |
| 202 | LGMN         | 0.183227 | 10.97084 | 0.415903 | 1.515739 | 7.53E-24 | 3.03E-22 |
| 203 | PRCAT47      | 0.064778 | 28.55266 | 0.415514 | 1.515149 | 8.34E-24 | 3.33E-22 |
| 204 | TBX21        | 0.128008 | 15.1052  | 0.414845 | 1.514136 | 9.92E-24 | 3.94E-22 |
| 205 | FEZ1         | 0.111439 | 17.14611 | 0.414581 | 1.513736 | 1.06E-23 | 4.20E-22 |
| 206 | P2RX5        | 0.689984 | 3.896822 | 0.413928 | 1.512748 | 1.26E-23 | 4.96E-22 |
| 207 | MID1IP1      | 0.143308 | 13.59738 | 0.411973 | 1.509794 | 2.08E-23 | 8.17E-22 |
| 208 | OASL         | 0.076402 | 24.23655 | 0.408233 | 1.504157 | 5.43E-23 | 2.12E-21 |
| 209 | KIAA0101     | 1.959446 | 2.23137  | 0.40792  | 1.503687 | 5.88E-23 | 2.28E-21 |
| 210 | GGH          | 0.375685 | 5.988059 | 0.406935 | 1.502207 | 7.56E-23 | 2.92E-21 |
| 211 | ING1         | 0.131184 | 14.65497 | 0.40688  | 1.502124 | 7.66E-23 | 2.95E-21 |
| 212 | NAPSA        | 0.824178 | 3.447388 | 0.404041 | 1.497865 | 1.57E-22 | 6.01E-21 |

*Supplementary Table S1. HVGs of lymphoblastoid cell line (LCL) cells (FDR<0.01).*

|     |              |          |          |          |          |          |          |
|-----|--------------|----------|----------|----------|----------|----------|----------|
| 213 | C16orf54     | 0.519249 | 4.669217 | 0.399882 | 1.491649 | 4.44E-22 | 1.69E-20 |
| 214 | SSPN         | 0.086291 | 21.41606 | 0.399092 | 1.490471 | 5.41E-22 | 2.05E-20 |
| 215 | ZFP36L2      | 1.909533 | 2.228711 | 0.396327 | 1.486355 | 1.07E-21 | 4.04E-20 |
| 216 | MKI67        | 0.220156 | 9.101972 | 0.388271 | 1.474429 | 7.58E-21 | 2.85E-19 |
| 217 | WNT10A       | 0.135055 | 14.00791 | 0.388119 | 1.474205 | 7.86E-21 | 2.94E-19 |
| 218 | NETO2        | 0.173001 | 11.21829 | 0.387666 | 1.473537 | 8.76E-21 | 3.26E-19 |
| 219 | H1FX         | 0.475053 | 4.916984 | 0.387137 | 1.472758 | 9.94E-21 | 3.68E-19 |
| 220 | AC074289.1   | 0.60414  | 4.141616 | 0.385945 | 1.471004 | 1.32E-20 | 4.87E-19 |
| 221 | MT1E         | 0.161488 | 11.89233 | 0.384964 | 1.469562 | 1.67E-20 | 6.13E-19 |
| 222 | SULF2        | 0.45236  | 5.081989 | 0.384019 | 1.468173 | 2.09E-20 | 7.63E-19 |
| 223 | HMX2         | 0.064445 | 27.74095 | 0.381772 | 1.464877 | 3.55E-20 | 1.29E-18 |
| 224 | RRM2         | 0.297716 | 7.018564 | 0.38058  | 1.463133 | 4.70E-20 | 1.70E-18 |
| 225 | CTA-384D8.34 | 0.765568 | 3.521795 | 0.379523 | 1.461587 | 6.02E-20 | 2.17E-18 |
| 226 | CCDC180      | 0.069647 | 25.63462 | 0.376643 | 1.457384 | 1.18E-19 | 4.22E-18 |
| 227 | CENPW        | 0.371408 | 5.849752 | 0.374662 | 1.4545   | 1.86E-19 | 6.64E-18 |
| 228 | STAC3        | 0.182702 | 10.55001 | 0.374272 | 1.453932 | 2.03E-19 | 7.23E-18 |
| 229 | RP11-47L3.1  | 0.048145 | 36.3838  | 0.373353 | 1.452597 | 2.51E-19 | 8.89E-18 |
| 230 | H1Fo         | 0.028551 | 60.4163  | 0.372528 | 1.451399 | 3.03E-19 | 1.07E-17 |
| 231 | ID3          | 9.208026 | 1.473999 | 0.371436 | 1.449815 | 3.89E-19 | 1.37E-17 |
| 232 | ORC6         | 0.283242 | 7.199161 | 0.365213 | 1.440821 | 1.58E-18 | 5.54E-17 |
| 233 | SEPP1        | 0.018414 | 92.28358 | 0.365179 | 1.440773 | 1.59E-18 | 5.55E-17 |
| 234 | S100A11      | 1.326346 | 2.540749 | 0.363032 | 1.437682 | 2.57E-18 | 8.92E-17 |
| 235 | CITED2       | 0.286484 | 7.114511 | 0.362729 | 1.437247 | 2.75E-18 | 9.50E-17 |
| 236 | EFNA5        | 0.051838 | 33.48108 | 0.361395 | 1.43533  | 3.69E-18 | 1.27E-16 |
| 237 | P3H2         | 0.155521 | 11.99528 | 0.360007 | 1.43334  | 5.01E-18 | 1.72E-16 |
| 238 | IL10         | 0.113198 | 15.98726 | 0.359025 | 1.431933 | 6.22E-18 | 2.12E-16 |
| 239 | IL4R         | 0.138878 | 13.25822 | 0.358376 | 1.431003 | 7.17E-18 | 2.43E-16 |
| 240 | ATF5         | 0.893849 | 3.133712 | 0.357613 | 1.429912 | 8.47E-18 | 2.86E-16 |
| 241 | TPRG1        | 0.162031 | 11.53163 | 0.357153 | 1.429254 | 9.36E-18 | 3.15E-16 |
| 242 | CMTM7        | 0.06435  | 27.01145 | 0.35371  | 1.424342 | 1.97E-17 | 6.61E-16 |
| 243 | TXNIP        | 1.161736 | 2.689571 | 0.352011 | 1.421924 | 2.84E-17 | 9.48E-16 |
| 244 | RGCC         | 0.297523 | 6.788475 | 0.34672  | 1.414421 | 8.73E-17 | 2.90E-15 |
| 245 | CRIP1        | 1.520919 | 2.339655 | 0.346158 | 1.413626 | 9.82E-17 | 3.25E-15 |
| 246 | CDKN3        | 0.244854 | 7.973275 | 0.34615  | 1.413615 | 9.84E-17 | 3.25E-15 |
| 247 | MYL9         | 0.042361 | 39.84131 | 0.340424 | 1.405543 | 3.24E-16 | 1.06E-14 |
| 248 | MAT2A        | 0.331387 | 6.162673 | 0.336904 | 1.400605 | 6.65E-16 | 2.18E-14 |
| 249 | CCND2        | 0.465026 | 4.738286 | 0.33443  | 1.397144 | 1.10E-15 | 3.58E-14 |
| 250 | CXCR3        | 1.389463 | 2.409114 | 0.332629 | 1.39463  | 1.58E-15 | 5.12E-14 |
| 251 | SNHG15       | 0.35679  | 5.784948 | 0.332119 | 1.393919 | 1.75E-15 | 5.65E-14 |
| 252 | SERPINB1     | 0.120226 | 14.70177 | 0.330498 | 1.391661 | 2.42E-15 | 7.78E-14 |
| 253 | MYBL2        | 0.527942 | 4.29147  | 0.327373 | 1.387319 | 4.48E-15 | 1.44E-13 |
| 254 | TROAP        | 0.143708 | 12.45624 | 0.326833 | 1.38657  | 4.99E-15 | 1.59E-13 |
| 255 | SERPINB9     | 0.172158 | 10.58543 | 0.325285 | 1.384425 | 6.76E-15 | 2.15E-13 |

*Supplementary Table S1. HVGs of lymphoblastoid cell line (LCL) cells (FDR<0.01).*

|     |               |          |          |          |          |          |          |
|-----|---------------|----------|----------|----------|----------|----------|----------|
| 256 | LRRK2         | 0.057138 | 29.4105  | 0.325206 | 1.384316 | 6.86E-15 | 2.17E-13 |
| 257 | PLD4          | 0.255021 | 7.527558 | 0.322776 | 1.380956 | 1.10E-14 | 3.48E-13 |
| 258 | TYW3          | 0.937556 | 2.941808 | 0.322488 | 1.380558 | 1.16E-14 | 3.66E-13 |
| 259 | DDIT3         | 0.531173 | 4.240014 | 0.319651 | 1.376648 | 2.01E-14 | 6.30E-13 |
| 260 | GMNN          | 0.260644 | 7.36133  | 0.318663 | 1.375287 | 2.43E-14 | 7.58E-13 |
| 261 | HIST1H2BJ     | 0.304336 | 6.476414 | 0.318061 | 1.374461 | 2.72E-14 | 8.47E-13 |
| 262 | PLA2G16       | 0.188759 | 9.687871 | 0.317574 | 1.373791 | 2.99E-14 | 9.26E-13 |
| 263 | CCDC74A       | 0.27521  | 7.01014  | 0.314905 | 1.370129 | 4.96E-14 | 1.53E-12 |
| 264 | RARRES3       | 0.744102 | 3.360024 | 0.314475 | 1.36954  | 5.37E-14 | 1.65E-12 |
| 265 | CLEC2B        | 0.103312 | 16.58268 | 0.311196 | 1.365056 | 9.92E-14 | 3.04E-12 |
| 266 | ADAM19        | 0.339408 | 5.889239 | 0.310551 | 1.364176 | 1.12E-13 | 3.41E-12 |
| 267 | CD44          | 1.874008 | 2.060936 | 0.310393 | 1.363961 | 1.15E-13 | 3.50E-12 |
| 268 | TYMS          | 0.440555 | 4.798071 | 0.306822 | 1.359099 | 2.22E-13 | 6.73E-12 |
| 269 | PTCRA         | 0.029281 | 54.95829 | 0.302529 | 1.353277 | 4.85E-13 | 1.46E-11 |
| 270 | S1PR2         | 0.27225  | 6.984789 | 0.302343 | 1.353025 | 5.01E-13 | 1.51E-11 |
| 271 | BNIP3         | 0.815303 | 3.131733 | 0.301359 | 1.351694 | 5.98E-13 | 1.79E-11 |
| 272 | ZC3H12A       | 0.123546 | 13.90203 | 0.299475 | 1.34915  | 8.38E-13 | 2.50E-11 |
| 273 | CD22          | 0.538987 | 4.101396 | 0.296772 | 1.345508 | 1.35E-12 | 4.02E-11 |
| 274 | TUBB2B        | 0.025851 | 61.67063 | 0.295761 | 1.344149 | 1.62E-12 | 4.79E-11 |
| 275 | RP3-428L16.2  | 0.069451 | 23.69647 | 0.295351 | 1.343597 | 1.74E-12 | 5.13E-11 |
| 276 | ISYNA1        | 0.036379 | 44.09157 | 0.293997 | 1.341779 | 2.20E-12 | 6.47E-11 |
| 277 | LINC01531     | 0.026813 | 59.3933  | 0.293948 | 1.341714 | 2.22E-12 | 6.50E-11 |
| 278 | GPR183        | 1.552441 | 2.199494 | 0.293808 | 1.341526 | 2.28E-12 | 6.64E-11 |
| 279 | CRELD2        | 5.273557 | 1.488956 | 0.29289  | 1.340295 | 2.67E-12 | 7.76E-11 |
| 280 | NR6A1         | 0.07672  | 21.50155 | 0.29241  | 1.339652 | 2.90E-12 | 8.41E-11 |
| 281 | PIM2          | 1.575018 | 2.181354 | 0.292098 | 1.339234 | 3.06E-12 | 8.85E-11 |
| 282 | ABCA6         | 0.065909 | 24.75805 | 0.289397 | 1.335622 | 4.88E-12 | 1.40E-10 |
| 283 | SRM           | 2.786531 | 1.743174 | 0.287396 | 1.332952 | 6.87E-12 | 1.97E-10 |
| 284 | GIMAP7        | 0.176153 | 9.98532  | 0.287164 | 1.332643 | 7.14E-12 | 2.04E-10 |
| 285 | SETP10        | 0.261747 | 7.103375 | 0.286511 | 1.331772 | 7.98E-12 | 2.27E-10 |
| 286 | PCID2         | 0.417661 | 4.890591 | 0.285749 | 1.330758 | 9.08E-12 | 2.58E-10 |
| 287 | SLC2A5        | 0.283454 | 6.644428 | 0.285643 | 1.330617 | 9.25E-12 | 2.61E-10 |
| 288 | MIR3142HG     | 0.047236 | 33.90387 | 0.284354 | 1.328904 | 1.15E-11 | 3.24E-10 |
| 289 | ITGB2-AS1     | 0.047324 | 33.786   | 0.282686 | 1.326689 | 1.52E-11 | 4.27E-10 |
| 290 | SELM          | 0.604004 | 3.731001 | 0.281382 | 1.324959 | 1.89E-11 | 5.28E-10 |
| 291 | WARS          | 1.051316 | 2.644119 | 0.280867 | 1.324278 | 2.06E-11 | 5.74E-10 |
| 292 | LMTK2         | 0.096063 | 17.1918  | 0.279679 | 1.322706 | 2.50E-11 | 6.96E-10 |
| 293 | RP3-395M20.12 | 0.066651 | 24.20264 | 0.277371 | 1.319655 | 3.66E-11 | 1.01E-09 |
| 294 | DMKN          | 0.047765 | 33.27008 | 0.276236 | 1.318159 | 4.40E-11 | 1.22E-09 |
| 295 | MKNK2         | 0.759758 | 3.183846 | 0.273832 | 1.314994 | 6.50E-11 | 1.79E-09 |
| 296 | RASSF6        | 0.041744 | 37.77582 | 0.272963 | 1.313852 | 7.48E-11 | 2.05E-09 |
| 297 | RASSF4        | 0.035527 | 44.17664 | 0.272855 | 1.31371  | 7.61E-11 | 2.08E-09 |
| 298 | PRDM1         | 0.644431 | 3.522823 | 0.267813 | 1.307102 | 1.70E-10 | 4.62E-09 |



Supplementary Table S1. HVGs of lymphoblastoid cell line (LCL) cells (FDR<0.01).

|     |               |          |          |          |          |          |          |
|-----|---------------|----------|----------|----------|----------|----------|----------|
| 299 | SAMSN1        | 1.224011 | 2.404877 | 0.267425 | 1.306596 | 1.80E-10 | 4.90E-09 |
| 300 | LDLRAD4       | 0.234995 | 7.62901  | 0.267292 | 1.306422 | 1.84E-10 | 4.98E-09 |
| 301 | DUSP10        | 0.290515 | 6.390739 | 0.266887 | 1.305893 | 1.96E-10 | 5.29E-09 |
| 302 | TRIB3         | 0.319711 | 5.90341  | 0.26521  | 1.303705 | 2.55E-10 | 6.86E-09 |
| 303 | ZBTB32        | 0.317389 | 5.936587 | 0.264954 | 1.303371 | 2.66E-10 | 7.11E-09 |
| 304 | LINC00926     | 0.254169 | 7.123154 | 0.264758 | 1.303115 | 2.74E-10 | 7.31E-09 |
| 305 | HMG2          | 7.576107 | 1.359058 | 0.263839 | 1.301919 | 3.16E-10 | 8.40E-09 |
| 306 | PMAIP1        | 1.807479 | 1.99637  | 0.263558 | 1.301553 | 3.30E-10 | 8.75E-09 |
| 307 | HNRNP1        | 1.21034  | 2.408447 | 0.263094 | 1.300949 | 3.54E-10 | 9.36E-09 |
| 308 | CD180         | 0.277111 | 6.617096 | 0.262887 | 1.30068  | 3.66E-10 | 9.64E-09 |
| 309 | ZWINT         | 0.266005 | 6.842029 | 0.262451 | 1.300112 | 3.91E-10 | 1.03E-08 |
| 310 | SPSB1         | 0.059494 | 26.54162 | 0.261247 | 1.298549 | 4.71E-10 | 1.23E-08 |
| 311 | HMMR          | 0.083075 | 19.32586 | 0.260726 | 1.297872 | 5.10E-10 | 1.33E-08 |
| 312 | MDM2          | 0.425232 | 4.698544 | 0.25927  | 1.295984 | 6.37E-10 | 1.66E-08 |
| 313 | TMEM51        | 0.0585   | 26.91249 | 0.259011 | 1.295649 | 6.62E-10 | 1.72E-08 |
| 314 | NKG7          | 0.283712 | 6.46387  | 0.258839 | 1.295425 | 6.80E-10 | 1.76E-08 |
| 315 | PAQR7         | 0.052783 | 29.67548 | 0.258091 | 1.294457 | 7.61E-10 | 1.96E-08 |
| 316 | BBC3          | 0.150664 | 11.13071 | 0.2568   | 1.292786 | 9.25E-10 | 2.38E-08 |
| 317 | C1orf186      | 0.464827 | 4.374272 | 0.254178 | 1.289402 | 1.37E-09 | 3.50E-08 |
| 318 | APOL1         | 0.350096 | 5.423372 | 0.252671 | 1.28746  | 1.71E-09 | 4.37E-08 |
| 319 | ERN1          | 0.31412  | 5.910346 | 0.252187 | 1.286836 | 1.84E-09 | 4.68E-08 |
| 320 | RP11-138A9.2  | 0.197457 | 8.722265 | 0.251825 | 1.286371 | 1.94E-09 | 4.92E-08 |
| 321 | PHF19         | 0.452447 | 4.451851 | 0.251778 | 1.286311 | 1.95E-09 | 4.94E-08 |
| 322 | SDF2L1        | 9.953629 | 1.292634 | 0.249488 | 1.283369 | 2.73E-09 | 6.89E-08 |
| 323 | TRBC2         | 0.52028  | 4.007111 | 0.248381 | 1.281948 | 3.21E-09 | 8.06E-08 |
| 324 | TBC1D30       | 0.02749  | 55.31664 | 0.247284 | 1.280543 | 3.76E-09 | 9.42E-08 |
| 325 | TLCD1         | 0.048234 | 32.01589 | 0.24724  | 1.280487 | 3.79E-09 | 9.45E-08 |
| 326 | GNG3          | 0.082051 | 19.28027 | 0.246705 | 1.279801 | 4.09E-09 | 1.02E-07 |
| 327 | OSR2          | 0.07772  | 20.26367 | 0.245353 | 1.278073 | 4.97E-09 | 1.23E-07 |
| 328 | BCAS1         | 0.034081 | 44.69735 | 0.244087 | 1.276455 | 5.95E-09 | 1.47E-07 |
| 329 | FCRL5         | 0.188663 | 9.005044 | 0.244039 | 1.276394 | 5.99E-09 | 1.48E-07 |
| 330 | RAB37         | 0.074813 | 20.93907 | 0.242121 | 1.273948 | 7.87E-09 | 1.93E-07 |
| 331 | AC104024.1    | 0.07801  | 20.09804 | 0.240658 | 1.272086 | 9.67E-09 | 2.37E-07 |
| 332 | SAMD10        | 0.225556 | 7.67493  | 0.23844  | 1.269267 | 1.32E-08 | 3.22E-07 |
| 333 | CAPN10-AS1    | 0.180558 | 9.298014 | 0.23758  | 1.268177 | 1.48E-08 | 3.62E-07 |
| 334 | RP6-159A1.4   | 0.090128 | 17.47114 | 0.236263 | 1.266507 | 1.78E-08 | 4.33E-07 |
| 335 | IRF4          | 2.116037 | 1.822407 | 0.235509 | 1.265553 | 1.97E-08 | 4.78E-07 |
| 336 | CCNB2         | 0.168205 | 9.873941 | 0.235156 | 1.265107 | 2.07E-08 | 5.01E-07 |
| 337 | UNC13C        | 0.027744 | 54.12548 | 0.234504 | 1.264281 | 2.27E-08 | 5.46E-07 |
| 338 | TOX2          | 0.047796 | 31.86032 | 0.23356  | 1.263089 | 2.58E-08 | 6.19E-07 |
| 339 | CLDN14        | 0.040711 | 37.00644 | 0.228111 | 1.256224 | 5.36E-08 | 1.28E-06 |
| 340 | RP11-511B23.1 | 0.022967 | 64.63706 | 0.226614 | 1.254346 | 6.53E-08 | 1.56E-06 |
| 341 | PTP4A3        | 0.184372 | 8.988018 | 0.222016 | 1.248592 | 1.19E-07 | 2.83E-06 |

Supplementary Table S1. HVGs of lymphoblastoid cell line (LCL) cells (FDR<0.01).

|     |                |          |          |          |          |          |          |
|-----|----------------|----------|----------|----------|----------|----------|----------|
| 342 | LBH            | 0.354835 | 5.201236 | 0.221438 | 1.24787  | 1.28E-07 | 3.04E-06 |
| 343 | C1orf228       | 0.076184 | 20.15095 | 0.220918 | 1.247221 | 1.37E-07 | 3.24E-06 |
| 344 | TSC22D3        | 0.202342 | 8.261061 | 0.218697 | 1.244455 | 1.82E-07 | 4.28E-06 |
| 345 | IFIT2          | 0.173193 | 9.458911 | 0.218059 | 1.243661 | 1.97E-07 | 4.63E-06 |
| 346 | OAS3           | 0.073362 | 20.81269 | 0.217532 | 1.243005 | 2.11E-07 | 4.94E-06 |
| 347 | A4GALT         | 0.129111 | 12.30088 | 0.217289 | 1.242704 | 2.17E-07 | 5.08E-06 |
| 348 | LMO7           | 0.086689 | 17.75294 | 0.215826 | 1.240887 | 2.61E-07 | 6.08E-06 |
| 349 | SlPR4          | 2.037246 | 1.81232  | 0.215305 | 1.24024  | 2.78E-07 | 6.47E-06 |
| 350 | CASP1          | 0.076087 | 20.03963 | 0.214177 | 1.238842 | 3.20E-07 | 7.43E-06 |
| 351 | UCHL1          | 0.514124 | 3.90098  | 0.213012 | 1.237399 | 3.70E-07 | 8.55E-06 |
| 352 | RGS3           | 0.142748 | 11.18005 | 0.212704 | 1.237018 | 3.84E-07 | 8.86E-06 |
| 353 | SPIB           | 0.862988 | 2.761272 | 0.210077 | 1.233774 | 5.30E-07 | 1.22E-05 |
| 354 | MYH10          | 0.022644 | 64.46674 | 0.210037 | 1.233724 | 5.33E-07 | 1.22E-05 |
| 355 | TNFSF4         | 0.019291 | 75.46696 | 0.209855 | 1.233499 | 5.45E-07 | 1.25E-05 |
| 356 | MNDA           | 0.744246 | 3.018694 | 0.207475 | 1.230567 | 7.26E-07 | 1.66E-05 |
| 357 | IPCEF1         | 0.10439  | 14.80309 | 0.207288 | 1.230337 | 7.43E-07 | 1.69E-05 |
| 358 | KCNQ1OT1       | 0.288871 | 6.048929 | 0.207273 | 1.230318 | 7.44E-07 | 1.69E-05 |
| 359 | RP11-1151B14.4 | 0.103325 | 14.93821 | 0.206872 | 1.229825 | 7.81E-07 | 1.76E-05 |
| 360 | IER2           | 1.231438 | 2.255063 | 0.206223 | 1.229027 | 8.44E-07 | 1.90E-05 |
| 361 | ZFP36          | 2.594001 | 1.643485 | 0.205095 | 1.227642 | 9.65E-07 | 2.17E-05 |
| 362 | LST1           | 0.074144 | 20.3479  | 0.204985 | 1.227507 | 9.78E-07 | 2.19E-05 |
| 363 | TNFSF14        | 0.185232 | 8.798172 | 0.204745 | 1.227212 | 1.01E-06 | 2.25E-05 |
| 364 | RAB13          | 0.940303 | 2.610178 | 0.204584 | 1.227015 | 1.03E-06 | 2.29E-05 |
| 365 | NME8           | 0.055862 | 26.63093 | 0.204278 | 1.226639 | 1.06E-06 | 2.36E-05 |
| 366 | CD1C           | 0.02866  | 50.86385 | 0.204163 | 1.226498 | 1.08E-06 | 2.39E-05 |
| 367 | RP4-555D20.2   | 0.036283 | 40.39424 | 0.203839 | 1.226101 | 1.12E-06 | 2.48E-05 |
| 368 | CBX6           | 0.809157 | 2.848714 | 0.201974 | 1.223817 | 1.39E-06 | 3.07E-05 |
| 369 | MGLL           | 0.690025 | 3.152212 | 0.20191  | 1.223738 | 1.40E-06 | 3.09E-05 |
| 370 | SQLE           | 0.57565  | 3.55706  | 0.200513 | 1.222029 | 1.65E-06 | 3.62E-05 |
| 371 | ARHGAP24       | 0.044679 | 32.87635 | 0.199825 | 1.221189 | 1.79E-06 | 3.91E-05 |
| 372 | ANP32E         | 0.550862 | 3.6608   | 0.198504 | 1.219577 | 2.08E-06 | 4.54E-05 |
| 373 | RP11-138I18.2  | 0.103733 | 14.75873 | 0.198437 | 1.219496 | 2.10E-06 | 4.57E-05 |
| 374 | BCL2L1         | 0.221488 | 7.488833 | 0.198354 | 1.219394 | 2.12E-06 | 4.60E-05 |
| 375 | QPRT           | 1.032586 | 2.456413 | 0.197231 | 1.218025 | 2.41E-06 | 5.21E-05 |
| 376 | CCL17          | 0.019474 | 73.78878 | 0.196692 | 1.217369 | 2.56E-06 | 5.53E-05 |
| 377 | IRF8           | 1.073633 | 2.4012   | 0.196081 | 1.216626 | 2.75E-06 | 5.91E-05 |
| 378 | NLK            | 0.135637 | 11.51444 | 0.195989 | 1.216514 | 2.78E-06 | 5.96E-05 |
| 379 | FCGR2A         | 0.070126 | 21.2508  | 0.195599 | 1.216039 | 2.90E-06 | 6.21E-05 |
| 380 | NAB2           | 0.10616  | 14.40449 | 0.195549 | 1.215978 | 2.92E-06 | 6.22E-05 |
| 381 | CHPF           | 0.418929 | 4.458511 | 0.195546 | 1.215975 | 2.92E-06 | 6.22E-05 |
| 382 | NOP16          | 0.535848 | 3.718889 | 0.194731 | 1.214984 | 3.20E-06 | 6.80E-05 |
| 383 | SH3TC1         | 0.149007 | 10.56121 | 0.194362 | 1.214536 | 3.34E-06 | 7.07E-05 |
| 384 | GPT2           | 0.073485 | 20.29654 | 0.194003 | 1.214099 | 3.47E-06 | 7.34E-05 |

Supplementary Table S1. HVGs of lymphoblastoid cell line (LCL) cells (FDR<0.01).

|     |               |          |          |          |          |          |          |
|-----|---------------|----------|----------|----------|----------|----------|----------|
| 385 | LRRC75A       | 0.148419 | 10.59186 | 0.193708 | 1.213741 | 3.59E-06 | 7.56E-05 |
| 386 | BEX5          | 0.16353  | 9.712392 | 0.193645 | 1.213666 | 3.61E-06 | 7.58E-05 |
| 387 | PLG           | 0.071025 | 20.95442 | 0.19364  | 1.213659 | 3.62E-06 | 7.58E-05 |
| 388 | LEUTX         | 0.042039 | 34.62616 | 0.192737 | 1.212564 | 4.00E-06 | 8.37E-05 |
| 389 | C2CD2L        | 0.063747 | 23.20026 | 0.192637 | 1.212443 | 4.04E-06 | 8.44E-05 |
| 390 | LIPH          | 0.192782 | 8.390735 | 0.19223  | 1.211949 | 4.23E-06 | 8.81E-05 |
| 391 | CCL25         | 0.321597 | 5.46099  | 0.192032 | 1.21171  | 4.33E-06 | 8.98E-05 |
| 392 | KCTD1         | 0.063944 | 23.08245 | 0.190493 | 1.209846 | 5.13E-06 | 0.000106 |
| 393 | HCK           | 0.118925 | 12.90572 | 0.19023  | 1.209528 | 5.28E-06 | 0.000109 |
| 394 | TCL1B         | 0.049975 | 29.21629 | 0.189911 | 1.209142 | 5.47E-06 | 0.000113 |
| 395 | NGFRAP1       | 0.061395 | 23.96011 | 0.188992 | 1.208031 | 6.05E-06 | 0.000124 |
| 396 | GPER1         | 0.028028 | 51.17853 | 0.188507 | 1.207446 | 6.38E-06 | 0.000131 |
| 397 | UPP1          | 0.061379 | 23.93328 | 0.187626 | 1.206382 | 7.02E-06 | 0.000143 |
| 398 | TNFSF11       | 0.024817 | 57.55387 | 0.186612 | 1.205159 | 7.83E-06 | 0.00016  |
| 399 | BATF3         | 0.055038 | 26.52765 | 0.186146 | 1.204599 | 8.23E-06 | 0.000167 |
| 400 | CCR10         | 1.062348 | 2.38981  | 0.185513 | 1.203836 | 8.81E-06 | 0.000179 |
| 401 | MIAT          | 0.129774 | 11.85153 | 0.184733 | 1.202897 | 9.58E-06 | 0.000194 |
| 402 | CCR6          | 0.109526 | 13.81517 | 0.182609 | 1.200345 | 1.20E-05 | 0.000242 |
| 403 | RP11-111A22.1 | 0.086653 | 17.13928 | 0.180259 | 1.197527 | 1.54E-05 | 0.000309 |
| 404 | GPR82         | 0.077213 | 19.08673 | 0.179335 | 1.196422 | 1.69E-05 | 0.000339 |
| 405 | FAM46C        | 0.207171 | 7.779921 | 0.179077 | 1.196113 | 1.74E-05 | 0.000348 |
| 406 | RP1-34B20.21  | 0.099667 | 14.99524 | 0.177237 | 1.193915 | 2.10E-05 | 0.000419 |
| 407 | CLSPN         | 0.047436 | 30.32488 | 0.176873 | 1.19348  | 2.18E-05 | 0.000434 |
| 408 | LAMP3         | 0.143473 | 10.7304  | 0.176217 | 1.192697 | 2.33E-05 | 0.000463 |
| 409 | C3orf58       | 0.147515 | 10.45248 | 0.174976 | 1.191218 | 2.64E-05 | 0.000524 |
| 410 | TRIB1         | 0.242509 | 6.761171 | 0.173142 | 1.189035 | 3.18E-05 | 0.000629 |
| 411 | HIST1H2BC     | 0.174421 | 8.984401 | 0.172828 | 1.188661 | 3.28E-05 | 0.000647 |
| 412 | CDCA7         | 0.152983 | 10.09441 | 0.17276  | 1.188581 | 3.30E-05 | 0.00065  |
| 413 | RP11-693J15.5 | 0.798823 | 2.788458 | 0.172638 | 1.188436 | 3.34E-05 | 0.000656 |
| 414 | NT5E          | 0.140953 | 10.8415  | 0.170534 | 1.185938 | 4.12E-05 | 0.000807 |
| 415 | EVI2A         | 1.459279 | 2.000117 | 0.170032 | 1.185343 | 4.33E-05 | 0.000846 |
| 416 | YPEL2         | 0.069847 | 20.76582 | 0.168725 | 1.183794 | 4.92E-05 | 0.000959 |
| 417 | MANF          | 9.270245 | 1.201482 | 0.167846 | 1.182755 | 5.35E-05 | 0.001042 |
| 418 | IGKV4-1       | 0.134145 | 11.28164 | 0.165541 | 1.180031 | 6.69E-05 | 0.001298 |
| 419 | HSP90B1       | 10.60661 | 1.179469 | 0.165038 | 1.179438 | 7.02E-05 | 0.001359 |
| 420 | ALDOC         | 0.21594  | 7.396479 | 0.164217 | 1.17847  | 7.59E-05 | 0.001466 |
| 421 | MZB1          | 20.20867 | 1.115055 | 0.162384 | 1.176312 | 9.03E-05 | 0.001739 |
| 422 | DPEP2         | 0.074694 | 19.36265 | 0.16234  | 1.17626  | 9.06E-05 | 0.001742 |
| 423 | C12orf75      | 4.157763 | 1.376232 | 0.162258 | 1.176164 | 9.13E-05 | 0.001752 |
| 424 | BCL7A         | 0.112674 | 13.18525 | 0.162064 | 1.175935 | 9.30E-05 | 0.00178  |
| 425 | PSTPIP2       | 0.049371 | 28.7344  | 0.161552 | 1.175334 | 9.76E-05 | 0.001863 |
| 426 | IL6R          | 0.084365 | 17.23815 | 0.160888 | 1.174553 | 0.000104 | 0.001977 |
| 427 | EIF4EBP1      | 0.757814 | 2.847972 | 0.160729 | 1.174366 | 0.000105 | 0.002002 |

Supplementary Table S1. HVGs of lymphoblastoid cell line (LCL) cells (FDR<0.01).

|     |               |          |          |          |          |          |          |
|-----|---------------|----------|----------|----------|----------|----------|----------|
| 428 | PFN2          | 0.093833 | 15.59545 | 0.160328 | 1.173895 | 0.000109 | 0.002074 |
| 429 | C4orf32       | 0.121531 | 12.27862 | 0.160266 | 1.173823 | 0.00011  | 0.002081 |
| 430 | RP3-325F22.5  | 0.149707 | 10.15513 | 0.159357 | 1.172757 | 0.00012  | 0.002258 |
| 431 | SESN2         | 0.188701 | 8.263364 | 0.158263 | 1.171474 | 0.000132 | 0.002491 |
| 432 | KCNK1         | 0.084263 | 17.21163 | 0.158217 | 1.171421 | 0.000133 | 0.002496 |
| 433 | BIK           | 0.971004 | 2.444782 | 0.157677 | 1.170788 | 0.00014  | 0.002617 |
| 434 | DNAJC5B       | 0.093662 | 15.56696 | 0.156793 | 1.169754 | 0.000151 | 0.00283  |
| 435 | ADAMTS12      | 0.207518 | 7.592748 | 0.156171 | 1.169027 | 0.00016  | 0.002987 |
| 436 | RP11-326C3.12 | 0.174496 | 8.830517 | 0.155932 | 1.168747 | 0.000164 | 0.003045 |
| 437 | TLR1          | 0.126137 | 11.81517 | 0.15577  | 1.168557 | 0.000166 | 0.003078 |
| 438 | LILRB4        | 0.218237 | 7.267996 | 0.155764 | 1.16855  | 0.000166 | 0.003078 |
| 439 | INSR          | 0.296254 | 5.624794 | 0.155194 | 1.167885 | 0.000175 | 0.003233 |
| 440 | CD3E          | 0.121496 | 12.21901 | 0.15514  | 1.167822 | 0.000176 | 0.003241 |
| 441 | CD82          | 0.641958 | 3.153805 | 0.154583 | 1.167171 | 0.000185 | 0.0034   |
| 442 | ANG           | 0.110251 | 13.34904 | 0.154374 | 1.166928 | 0.000188 | 0.003456 |
| 443 | CENPV         | 0.377819 | 4.631045 | 0.154347 | 1.166895 | 0.000189 | 0.003457 |
| 444 | IFNG-AS1      | 0.136641 | 10.96859 | 0.154105 | 1.166614 | 0.000193 | 0.003524 |
| 445 | MYO1F         | 0.540306 | 3.547935 | 0.15354  | 1.165954 | 0.000203 | 0.003699 |
| 446 | IGHG4         | 0.137777 | 10.87999 | 0.153487 | 1.165892 | 0.000204 | 0.003708 |
| 447 | AL109761.5    | 0.110389 | 13.31301 | 0.152823 | 1.165118 | 0.000216 | 0.003924 |
| 448 | LINC00886     | 0.049703 | 28.26315 | 0.151477 | 1.163551 | 0.000243 | 0.00441  |
| 449 | GSTM3         | 0.040412 | 34.51904 | 0.15137  | 1.163427 | 0.000246 | 0.004441 |
| 450 | KLHL6         | 0.088776 | 16.25661 | 0.150061 | 1.161905 | 0.000276 | 0.00497  |
| 451 | XBP1          | 4.744628 | 1.318401 | 0.149345 | 1.161073 | 0.000293 | 0.005278 |
| 452 | LINC01307     | 0.137883 | 10.82238 | 0.148877 | 1.16053  | 0.000305 | 0.005484 |
| 453 | RGL4          | 0.038033 | 36.51086 | 0.148564 | 1.160167 | 0.000314 | 0.005622 |
| 454 | MOXD1         | 0.044626 | 31.23002 | 0.147297 | 1.158698 | 0.00035  | 0.006255 |
| 455 | PHACTR1       | 1.043839 | 2.319355 | 0.145857 | 1.157031 | 0.000396 | 0.007057 |
| 456 | AUTS2         | 0.089533 | 16.05881 | 0.145767 | 1.156926 | 0.000399 | 0.007096 |
| 457 | GLUL          | 0.148157 | 10.10625 | 0.14519  | 1.156259 | 0.000419 | 0.007434 |
| 458 | KDM2B         | 0.215781 | 7.255553 | 0.144345 | 1.155282 | 0.00045  | 0.007966 |
| 459 | GCSAM         | 0.785029 | 2.739985 | 0.144258 | 1.155182 | 0.000453 | 0.008007 |
| 460 | FTH1          | 59.37972 | 1.050792 | 0.143899 | 1.154768 | 0.000467 | 0.008234 |
| 461 | SORL1         | 0.400944 | 4.376459 | 0.143571 | 1.154389 | 0.00048  | 0.008445 |
| 462 | HIP1          | 0.050498 | 27.60886 | 0.143337 | 1.154119 | 0.000489 | 0.008592 |
| 463 | MIB2          | 0.215455 | 7.255598 | 0.143056 | 1.153794 | 0.000501 | 0.008778 |
| 464 | SMYD3         | 0.151255 | 9.897882 | 0.142925 | 1.153644 | 0.000506 | 0.008854 |
| 465 | GPR155        | 0.212498 | 7.334812 | 0.14204  | 1.152623 | 0.000545 | 0.009509 |

Supplementary Table S2. HVGs of lung airway epithelial cells (LAECs) (FDR<0.01).

**Supplementary Table S2. HVGs of lung airway epithelial cells (LAECs) (FDR<0.01).**

| id | genes         | u        | cv2      | residualcv2 | fitratio | pval | fdr |
|----|---------------|----------|----------|-------------|----------|------|-----|
| 1  | IGFBP5        | 0.3422   | 366.8569 | 4.521678    | 91.98979 | 0    | 0   |
| 2  | COL1A2        | 0.402753 | 162.9321 | 3.852893    | 47.12919 | 0    | 0   |
| 3  | POSTN         | 0.15356  | 253.3906 | 3.415588    | 30.43484 | 0    | 0   |
| 4  | COL1A1        | 0.68134  | 62.38933 | 3.331199    | 27.97186 | 0    | 0   |
| 5  | SPARC         | 0.30297  | 106.0357 | 3.171943    | 23.85378 | 0    | 0   |
| 6  | TSLP          | 0.658173 | 43.62917 | 2.945928    | 19.02831 | 0    | 0   |
| 7  | IGFL1         | 0.334309 | 75.65533 | 2.92221     | 18.5823  | 0    | 0   |
| 8  | IFNL2         | 0.520793 | 50.31697 | 2.896921    | 18.11827 | 0    | 0   |
| 9  | IFNL3         | 0.442755 | 52.73862 | 2.806557    | 16.55282 | 0    | 0   |
| 10 | CCL2          | 1.451734 | 15.0024  | 2.454099    | 11.63595 | 0    | 0   |
| 11 | IL23A         | 1.439021 | 14.56089 | 2.418541    | 11.22946 | 0    | 0   |
| 12 | SERPINB4      | 1.837869 | 12.3673  | 2.406701    | 11.09729 | 0    | 0   |
| 13 | S100A7        | 0.457983 | 29.3218  | 2.248435    | 9.472897 | 0    | 0   |
| 14 | COL3A1        | 0.10598  | 111.0061 | 2.236555    | 9.361029 | 0    | 0   |
| 15 | COL6A3        | 0.044814 | 234.9718 | 2.148192    | 8.569349 | 0    | 0   |
| 16 | PI3           | 3.386293 | 6.972353 | 2.147977    | 8.56751  | 0    | 0   |
| 17 | RP11-338I21.1 | 0.035711 | 286.7962 | 2.123833    | 8.363136 | 0    | 0   |
| 18 | TEX26-AS1     | 0.030836 | 330.5665 | 2.12091     | 8.338725 | 0    | 0   |
| 19 | OVOS2         | 0.1025   | 101.2763 | 2.1127      | 8.270542 | 0    | 0   |
| 20 | GREM1         | 0.038824 | 256.9982 | 2.096538    | 8.13795  | 0    | 0   |
| 21 | AMTN          | 0.481061 | 20.84226 | 1.948835    | 7.020506 | 0    | 0   |
| 22 | TNFAIP6       | 1.47615  | 8.760052 | 1.926826    | 6.867676 | 0    | 0   |
| 23 | S100A8        | 1.074926 | 10.35836 | 1.879684    | 6.551435 | 0    | 0   |
| 24 | MSMB          | 1.007618 | 10.74332 | 1.869777    | 6.486847 | 0    | 0   |
| 25 | IL17C         | 2.239176 | 6.274484 | 1.839883    | 6.295805 | 0    | 0   |
| 26 | LY6D          | 0.186798 | 43.30096 | 1.832953    | 6.252323 | 0    | 0   |
| 27 | SLC15A2       | 0.295966 | 28.34831 | 1.831725    | 6.244652 | 0    | 0   |
| 28 | KRT81         | 0.094953 | 80.34071 | 1.807393    | 6.09454  | 0    | 0   |
| 29 | AREG          | 9.075432 | 3.566721 | 1.799062    | 6.043975 | 0    | 0   |
| 30 | CXCL6         | 0.678661 | 13.03051 | 1.761965    | 5.823868 | 0    | 0   |
| 31 | CTGF          | 0.146548 | 50.33998 | 1.755226    | 5.784755 | 0    | 0   |
| 32 | CRCT1         | 0.47111  | 17.12071 | 1.734429    | 5.665694 | 0    | 0   |
| 33 | PPBP          | 0.758688 | 11.41749 | 1.717488    | 5.570517 | 0    | 0   |
| 34 | MMP1          | 0.698346 | 11.95643 | 1.698626    | 5.466434 | 0    | 0   |
| 35 | COL6A1        | 0.24869  | 29.02535 | 1.6975      | 5.460278 | 0    | 0   |
| 36 | SERPINB2      | 2.356929 | 5.216303 | 1.682605    | 5.379553 | 0    | 0   |
| 37 | SUGCT         | 2.210794 | 5.232406 | 1.651336    | 5.213943 | 0    | 0   |
| 38 | S100A9        | 24.53591 | 2.468123 | 1.584215    | 4.875464 | 0    | 0   |
| 39 | MEG3          | 0.030171 | 190.7004 | 1.549247    | 4.707925 | 0    | 0   |
| 40 | IFNL1         | 0.906759 | 8.333716 | 1.538342    | 4.656862 | 0    | 0   |

*Supplementary Table S2. HVGs of lung airway epithelial cells (LAECs) (FDR<0.01).*

|    |          |          |          |          |          |           |           |
|----|----------|----------|----------|----------|----------|-----------|-----------|
| 41 | CXCL5    | 5.059604 | 3.155575 | 1.511859 | 4.535152 | 0         | 0         |
| 42 | FBXO32   | 0.837573 | 8.458314 | 1.49349  | 4.452609 | 0         | 0         |
| 43 | KRT6B    | 2.948961 | 3.709274 | 1.453863 | 4.279615 | 0         | 0         |
| 44 | KRT14    | 0.823119 | 8.221108 | 1.451798 | 4.270787 | 0         | 0         |
| 45 | CCL5     | 15.97882 | 2.228143 | 1.431141 | 4.183469 | 0         | 0         |
| 46 | HAS2     | 0.0571   | 90.29242 | 1.429499 | 4.176607 | 0         | 0         |
| 47 | ANKRD1   | 0.126662 | 41.07686 | 1.413192 | 4.10905  | 0         | 0         |
| 48 | SULF1    | 0.046107 | 108.738  | 1.405627 | 4.078084 | 0         | 0         |
| 49 | SERPINB3 | 0.841328 | 7.692464 | 1.401977 | 4.063225 | 0         | 0         |
| 50 | CCL7     | 0.024243 | 202.5249 | 1.39286  | 4.026348 | 0         | 0         |
| 51 | NEXN     | 0.469267 | 12.0642  | 1.381055 | 3.979096 | 0         | 0         |
| 52 | LCE3D    | 0.054741 | 86.82733 | 1.34906  | 3.853802 | 0         | 0         |
| 53 | IL20     | 0.066254 | 71.97708 | 1.34811  | 3.850142 | 0         | 0         |
| 54 | THBS2    | 0.073408 | 64.69675 | 1.341375 | 3.8243   | 0         | 0         |
| 55 | SBSN     | 0.03048  | 153.0234 | 1.339206 | 3.816012 | 2.96e-323 | 5.90-321  |
| 56 | GDF15    | 2.710583 | 3.426464 | 1.333822 | 3.795521 | 5.22e-320 | 1.02e-317 |
| 57 | COL6A2   | 0.031812 | 144.0976 | 1.321402 | 3.748673 | 1.56e-312 | 3.00-310  |
| 58 | IL13RA2  | 0.543652 | 9.653596 | 1.281669 | 3.602647 | 1.89E-289 | 3.57E-287 |
| 59 | LUM      | 0.016842 | 259.2768 | 1.278459 | 3.5911   | 1.22E-287 | 2.27E-285 |
| 60 | VIM      | 0.640769 | 8.331497 | 1.268731 | 3.556335 | 3.34E-282 | 6.10E-280 |
| 61 | CGA      | 0.044896 | 97.29511 | 1.26828  | 3.554734 | 5.93E-282 | 1.07E-279 |
| 62 | DKK1     | 0.303146 | 15.37342 | 1.241329 | 3.460209 | 2.81E-267 | 4.92E-265 |
| 63 | ADAMTS2  | 0.015892 | 264.6734 | 1.241323 | 3.46019  | 2.83E-267 | 4.92E-265 |
| 64 | CCL3L3   | 0.036405 | 116.2132 | 1.239485 | 3.453833 | 2.71E-266 | 4.64E-264 |
| 65 | IFNB1    | 0.075163 | 56.06027 | 1.221074 | 3.390829 | 1.31E-256 | 2.21E-254 |
| 66 | CSF2     | 3.525373 | 2.669806 | 1.205479 | 3.338359 | 1.34E-248 | 2.22E-246 |
| 67 | SFTA1P   | 1.283625 | 4.638519 | 1.199123 | 3.317207 | 2.19E-245 | 3.58E-243 |
| 68 | TIMP1    | 9.432114 | 1.940592 | 1.198977 | 3.316721 | 2.59E-245 | 4.18E-243 |
| 69 | OLR1     | 0.427302 | 10.84251 | 1.194176 | 3.300838 | 6.62E-243 | 1.05E-240 |
| 70 | RGS2     | 0.769233 | 6.588071 | 1.17831  | 3.24888  | 4.57E-235 | 7.16E-233 |
| 71 | ITGA1    | 0.17072  | 24.20949 | 1.167215 | 3.213031 | 1.09E-229 | 1.68E-227 |
| 72 | FST      | 7.060735 | 1.9896   | 1.15296  | 3.167554 | 6.59E-223 | 1.00E-220 |
| 73 | DHRS9    | 0.730404 | 6.605607 | 1.140614 | 3.128688 | 3.80E-217 | 5.71E-215 |
| 74 | CYP24A1  | 0.510087 | 8.833089 | 1.1397   | 3.12583  | 1.00E-216 | 1.49E-214 |
| 75 | TAGLN    | 4.963836 | 2.143319 | 1.118444 | 3.060088 | 4.64E-207 | 6.78E-205 |
| 76 | PTX3     | 0.295949 | 13.82639 | 1.113685 | 3.045559 | 6.14E-205 | 8.86E-203 |
| 77 | MMP13    | 0.205037 | 19.29789 | 1.111514 | 3.038956 | 5.64E-204 | 8.03E-202 |
| 78 | AQP3     | 4.433787 | 2.187756 | 1.098256 | 2.998931 | 3.69E-198 | 5.18E-196 |
| 79 | CLNK     | 0.291392 | 13.62221 | 1.08484  | 2.958968 | 2.16E-192 | 3.00E-190 |
| 80 | IL6      | 6.026135 | 1.911218 | 1.067052 | 2.906797 | 6.38E-185 | 8.74E-183 |
| 81 | LTB      | 11.41982 | 1.609612 | 1.050832 | 2.860031 | 2.77E-178 | 3.74E-176 |
| 82 | SRGN     | 0.380583 | 10.37734 | 1.049867 | 2.857271 | 6.79E-178 | 9.07E-176 |
| 83 | SPP1     | 0.068844 | 50.73216 | 1.03572  | 2.817133 | 3.02E-172 | 3.98E-170 |

Supplementary Table S2. HVGs of lung airway epithelial cells (LAECs) (FDR<0.01).

|     |               |          |          |          |          |           |           |
|-----|---------------|----------|----------|----------|----------|-----------|-----------|
| 84  | NUPR1         | 16.61788 | 1.452156 | 1.008497 | 2.741476 | 1.01E-161 | 1.32E-159 |
| 85  | CYP1B1        | 0.107756 | 31.41651 | 0.990274 | 2.691971 | 6.35E-155 | 8.20E-153 |
| 86  | IL36G         | 9.119815 | 1.584866 | 0.989014 | 2.688581 | 1.84E-154 | 2.35E-152 |
| 87  | MMP9          | 0.212473 | 16.50988 | 0.988497 | 2.687194 | 2.85E-154 | 3.59E-152 |
| 88  | IL1RL1        | 0.235331 | 14.97132 | 0.984882 | 2.677495 | 5.99E-153 | 7.46E-151 |
| 89  | COL4A1        | 0.422932 | 8.838681 | 0.980983 | 2.667077 | 1.56E-151 | 1.93E-149 |
| 90  | DUOXA2        | 3.124207 | 2.233415 | 0.973434 | 2.647019 | 8.19E-149 | 9.97E-147 |
| 91  | CXCL9         | 0.067621 | 48.11255 | 0.965227 | 2.625383 | 6.79E-146 | 8.18E-144 |
| 92  | KRT23         | 0.507769 | 7.444874 | 0.964902 | 2.62453  | 8.85E-146 | 1.05E-143 |
| 93  | PLAT          | 1.240323 | 3.724778 | 0.956505 | 2.602585 | 7.79E-143 | 9.18E-141 |
| 94  | RRAD          | 0.062065 | 51.77931 | 0.954983 | 2.598627 | 2.64E-142 | 3.08E-140 |
| 95  | SPRR2D        | 0.108205 | 29.41605 | 0.928475 | 2.530648 | 2.73E-133 | 3.15E-131 |
| 96  | LINC00958     | 2.04908  | 2.648251 | 0.92828  | 2.530155 | 3.17E-133 | 3.62E-131 |
| 97  | NKX3-1        | 1.471711 | 3.226156 | 0.925982 | 2.524346 | 1.84E-132 | 2.08E-130 |
| 98  | INHBA         | 6.242686 | 1.619937 | 0.912333 | 2.490125 | 5.46E-128 | 6.10E-126 |
| 99  | CYR61         | 1.479118 | 3.165918 | 0.910356 | 2.485206 | 2.38E-127 | 2.63E-125 |
| 100 | CCNA1         | 1.037619 | 3.977149 | 0.897215 | 2.452762 | 3.74E-123 | 4.11E-121 |
| 101 | CKS2          | 6.927309 | 1.547587 | 0.896489 | 2.450983 | 6.35E-123 | 6.89E-121 |
| 102 | STC1          | 1.893739 | 2.680656 | 0.895264 | 2.447983 | 1.54E-122 | 1.66E-120 |
| 103 | BAMBI         | 0.125974 | 24.58496 | 0.894682 | 2.446557 | 2.35E-122 | 2.51E-120 |
| 104 | CLEC2D        | 0.634284 | 5.727787 | 0.885821 | 2.424974 | 1.37E-119 | 1.45E-117 |
| 105 | CX3CL1        | 1.06441  | 3.850671 | 0.883138 | 2.418477 | 9.28E-119 | 9.69E-117 |
| 106 | IL19          | 0.051476 | 56.77675 | 0.863981 | 2.372587 | 6.04E-113 | 6.24E-111 |
| 107 | SPRR1B        | 0.552169 | 6.270775 | 0.863115 | 2.370534 | 1.09E-112 | 1.12E-110 |
| 108 | NREP          | 0.178627 | 17.03359 | 0.85813  | 2.358746 | 3.30E-111 | 3.35E-109 |
| 109 | CLEC2B        | 0.493746 | 6.846158 | 0.857518 | 2.357302 | 5.01E-111 | 5.04E-109 |
| 110 | KRTAP2-3      | 0.110306 | 26.6673  | 0.848835 | 2.336924 | 1.75E-108 | 1.74E-106 |
| 111 | CTD-2017D11.1 | 0.16016  | 18.31027 | 0.827838 | 2.288367 | 1.73E-102 | 1.71E-100 |
| 112 | CH25H         | 0.063969 | 44.2392  | 0.827112 | 2.286706 | 2.76E-102 | 2.70E-100 |
| 113 | TNF           | 0.364563 | 8.612859 | 0.825805 | 2.283719 | 6.41E-102 | 6.22E-100 |
| 114 | Sl00A4        | 0.937216 | 3.982929 | 0.824546 | 2.280846 | 1.44E-101 | 1.38E-99  |
| 115 | PTHLH         | 0.720085 | 4.866944 | 0.823995 | 2.279589 | 2.05E-101 | 1.95E-99  |
| 116 | AKAP12        | 1.428491 | 2.966611 | 0.82286  | 2.277003 | 4.24E-101 | 4.00E-99  |
| 117 | ALDH3A1       | 0.461551 | 6.911097 | 0.809842 | 2.247553 | 1.59E-97  | 1.49E-95  |
| 118 | CCL20         | 46.66523 | 1.083928 | 0.808579 | 2.244715 | 3.50E-97  | 3.25E-95  |
| 119 | LY6K          | 0.453381 | 7.003775 | 0.807938 | 2.243277 | 5.22E-97  | 4.81E-95  |
| 120 | FN1           | 11.32735 | 1.24032  | 0.788674 | 2.200478 | 6.89E-92  | 6.30E-90  |
| 121 | CCDC71L       | 2.827852 | 1.944631 | 0.788055 | 2.199115 | 1.00E-91  | 9.06E-90  |
| 122 | FBN1          | 0.029648 | 90.62215 | 0.787948 | 2.198881 | 1.07E-91  | 9.58E-90  |
| 123 | AKR1C2        | 0.315185 | 9.380832 | 0.782226 | 2.186333 | 3.26E-90  | 2.90E-88  |
| 124 | KRT80         | 0.092043 | 29.52914 | 0.776431 | 2.173701 | 1.00E-88  | 8.86E-87  |
| 125 | APOE          | 1.117765 | 3.340811 | 0.77573  | 2.172178 | 1.51E-88  | 1.33E-86  |
| 126 | CXCL3         | 17.61087 | 1.137975 | 0.772467 | 2.165101 | 1.02E-87  | 8.90E-86  |

*Supplementary Table S2. HVGs of lung airway epithelial cells (LAECs) (FDR<0.01).*

|     |                |          |          |          |          |          |          |
|-----|----------------|----------|----------|----------|----------|----------|----------|
| 127 | SDC2           | 0.055933 | 47.57607 | 0.768567 | 2.156673 | 9.89E-87 | 8.53E-85 |
| 128 | CLIC3          | 0.029454 | 88.71605 | 0.760192 | 2.138687 | 1.22E-84 | 1.05E-82 |
| 129 | EREG           | 1.559601 | 2.614265 | 0.752548 | 2.122402 | 9.28E-83 | 7.89E-81 |
| 130 | IL33           | 7.242763 | 1.309399 | 0.741465 | 2.099008 | 4.44E-80 | 3.74E-78 |
| 131 | C8orf4         | 0.25284  | 10.90537 | 0.733702 | 2.082776 | 3.10E-78 | 2.59E-76 |
| 132 | FLJ22447       | 0.059563 | 43.1313  | 0.732023 | 2.079284 | 7.69E-78 | 6.38E-76 |
| 133 | KIAA0101       | 0.498177 | 5.96862  | 0.727869 | 2.070663 | 7.21E-77 | 5.94E-75 |
| 134 | SLC2A3         | 0.041903 | 60.03886 | 0.717636 | 2.049583 | 1.66E-74 | 1.36E-72 |
| 135 | PTGS2          | 1.72444  | 2.358165 | 0.711458 | 2.036959 | 4.20E-73 | 3.41E-71 |
| 136 | ANGPTL4        | 1.884057 | 2.196767 | 0.6932   | 2.000106 | 4.71E-69 | 3.79E-67 |
| 137 | CLDN11         | 0.192502 | 13.31843 | 0.681992 | 1.977813 | 1.22E-66 | 9.78E-65 |
| 138 | EDN1           | 3.563444 | 1.574349 | 0.681905 | 1.977641 | 1.27E-66 | 1.01E-64 |
| 139 | EGR1           | 1.149755 | 2.981462 | 0.68168  | 1.977197 | 1.42E-66 | 1.12E-64 |
| 140 | CDH11          | 0.062147 | 39.06004 | 0.674382 | 1.962819 | 4.96E-65 | 3.88E-63 |
| 141 | ADAMTS1        | 0.855461 | 3.668829 | 0.67422  | 1.962502 | 5.36E-65 | 4.17E-63 |
| 142 | TESC           | 0.072753 | 33.2997  | 0.668483 | 1.951275 | 8.42E-64 | 6.50E-62 |
| 143 | NR4A3          | 0.12814  | 19.27864 | 0.667812 | 1.949966 | 1.16E-63 | 8.89E-62 |
| 144 | RP11-357H14.17 | 0.032716 | 72.71821 | 0.665186 | 1.944852 | 4.04E-63 | 3.07E-61 |
| 145 | CCK            | 0.317478 | 8.259602 | 0.661407 | 1.937517 | 2.41E-62 | 1.82E-60 |
| 146 | RBP1           | 1.219065 | 2.785477 | 0.654117 | 1.923443 | 7.23E-61 | 5.43E-59 |
| 147 | SERPINE1       | 0.54234  | 5.16081  | 0.653428 | 1.922119 | 9.95E-61 | 7.42E-59 |
| 148 | FOLR1          | 0.437277 | 6.150304 | 0.647036 | 1.909872 | 1.88E-59 | 1.39E-57 |
| 149 | SLC6A14        | 3.244538 | 1.577538 | 0.642914 | 1.902016 | 1.22E-58 | 9.00E-57 |
| 150 | TNIP3          | 0.877111 | 3.467474 | 0.6366   | 1.890044 | 2.09E-57 | 1.53E-55 |
| 151 | CTSC           | 5.947212 | 1.245266 | 0.634621 | 1.886307 | 5.05E-57 | 3.67E-55 |
| 152 | TGM2           | 6.803    | 1.196253 | 0.633951 | 1.885043 | 6.81E-57 | 4.91E-55 |
| 153 | FGFBP1         | 0.674075 | 4.239445 | 0.633704 | 1.884578 | 7.60E-57 | 5.44E-55 |
| 154 | COL5A1         | 0.086037 | 27.26816 | 0.631485 | 1.880401 | 2.03E-56 | 1.44E-54 |
| 155 | MAP1B          | 0.064541 | 36.02835 | 0.630511 | 1.878571 | 3.12E-56 | 2.21E-54 |
| 156 | CTHRC1         | 0.049044 | 46.89721 | 0.625302 | 1.868811 | 3.06E-55 | 2.15E-53 |
| 157 | SERPINB7       | 2.149317 | 1.901199 | 0.623492 | 1.865431 | 6.74E-55 | 4.70E-53 |
| 158 | SLC34A2        | 0.422726 | 6.168513 | 0.620883 | 1.86057  | 2.09E-54 | 1.45E-52 |
| 159 | MMP7           | 0.362101 | 7.057947 | 0.620746 | 1.860316 | 2.21E-54 | 1.53E-52 |
| 160 | BPGM           | 3.264412 | 1.526346 | 0.612663 | 1.845339 | 7.05E-53 | 4.83E-51 |
| 161 | CD55           | 1.280787 | 2.581217 | 0.611498 | 1.843191 | 1.15E-52 | 7.86E-51 |
| 162 | MT1E           | 16.43354 | 0.971858 | 0.605363 | 1.831917 | 1.52E-51 | 1.03E-49 |
| 163 | C1orf56        | 2.449275 | 1.737199 | 0.603226 | 1.828007 | 3.71E-51 | 2.50E-49 |
| 164 | MYL9           | 2.717297 | 1.647673 | 0.602878 | 1.82737  | 4.29E-51 | 2.87E-49 |
| 165 | AC004791.2     | 0.051829 | 43.32719 | 0.600334 | 1.822728 | 1.23E-50 | 8.18E-49 |
| 166 | THBS1          | 1.939852 | 1.965333 | 0.598813 | 1.819956 | 2.31E-50 | 1.52E-48 |
| 167 | KRBOX1         | 0.038551 | 57.80122 | 0.597541 | 1.817643 | 3.89E-50 | 2.55E-48 |
| 168 | MROH8          | 0.073895 | 30.49126 | 0.595539 | 1.814009 | 8.83E-50 | 5.76E-48 |
| 169 | ESM1           | 0.039579 | 55.92396 | 0.590442 | 1.804786 | 7.01E-49 | 4.55E-47 |



*Supplementary Table S2. HVGs of lung airway epithelial cells (LAECs) (FDR<0.01).*

|     |           |          |          |          |          |          |          |
|-----|-----------|----------|----------|----------|----------|----------|----------|
| 170 | TNFSF15   | 0.200596 | 11.69562 | 0.590394 | 1.8047   | 7.15E-49 | 4.61E-47 |
| 171 | S100P     | 2.163384 | 1.829495 | 0.58864  | 1.801537 | 1.45E-48 | 9.30E-47 |
| 172 | RHCG      | 0.67339  | 4.0092   | 0.577053 | 1.780783 | 1.45E-46 | 9.24E-45 |
| 173 | TNFAIP2   | 9.340519 | 1.041381 | 0.574387 | 1.776041 | 4.11E-46 | 2.61E-44 |
| 174 | WNT5A     | 0.051098 | 42.71092 | 0.572079 | 1.771947 | 1.01E-45 | 6.36E-44 |
| 175 | AIM2      | 0.853244 | 3.310872 | 0.569598 | 1.767557 | 2.63E-45 | 1.65E-43 |
| 176 | CKB       | 0.787468 | 3.50894  | 0.566464 | 1.762026 | 8.79E-45 | 5.47E-43 |
| 177 | TIMP3     | 2.067739 | 1.834166 | 0.566068 | 1.761327 | 1.02E-44 | 6.33E-43 |
| 178 | LAYN      | 0.783748 | 3.511114 | 0.563433 | 1.756694 | 2.79E-44 | 1.72E-42 |
| 179 | ARL4C     | 1.175102 | 2.604544 | 0.561672 | 1.753602 | 5.45E-44 | 3.34E-42 |
| 180 | NR4A2     | 0.332347 | 7.151168 | 0.558069 | 1.747295 | 2.12E-43 | 1.29E-41 |
| 181 | TUBA1A    | 0.788711 | 3.455106 | 0.552218 | 1.737102 | 1.88E-42 | 1.14E-40 |
| 182 | NR2F2     | 2.114002 | 1.781414 | 0.549242 | 1.73194  | 5.65E-42 | 3.40E-40 |
| 183 | ADAMTS9   | 0.263164 | 8.721966 | 0.546755 | 1.727638 | 1.41E-41 | 8.42E-40 |
| 184 | AQP5      | 0.063895 | 33.43544 | 0.545999 | 1.726331 | 1.85E-41 | 1.10E-39 |
| 185 | FAM43A    | 0.295108 | 7.855156 | 0.545716 | 1.725843 | 2.06E-41 | 1.22E-39 |
| 186 | SLC7A11   | 0.757805 | 3.53998  | 0.545557 | 1.725569 | 2.18E-41 | 1.28E-39 |
| 187 | ATP2B1    | 1.462482 | 2.212451 | 0.544745 | 1.724169 | 2.93E-41 | 1.72E-39 |
| 188 | GAL       | 2.522055 | 1.612636 | 0.543916 | 1.72274  | 3.96E-41 | 2.31E-39 |
| 189 | LGALS1    | 0.782529 | 3.421232 | 0.5363   | 1.70967  | 6.15E-40 | 3.56E-38 |
| 190 | EPB41L3   | 0.019131 | 108.645  | 0.535203 | 1.707796 | 9.08E-40 | 5.24E-38 |
| 191 | KCNJ2     | 0.058154 | 35.67521 | 0.518815 | 1.680035 | 2.77E-37 | 1.59E-35 |
| 192 | COL5A2    | 0.231167 | 9.519108 | 0.515639 | 1.674709 | 8.17E-37 | 4.67E-35 |
| 193 | NR2F1     | 0.037995 | 54.00307 | 0.515252 | 1.674059 | 9.32E-37 | 5.29E-35 |
| 194 | UCHL1     | 0.972363 | 2.83803  | 0.512688 | 1.669773 | 2.22E-36 | 1.25E-34 |
| 195 | NPW       | 0.225273 | 9.716505 | 0.512389 | 1.669274 | 2.45E-36 | 1.38E-34 |
| 196 | IGF2      | 0.063136 | 32.59572 | 0.508889 | 1.663442 | 7.93E-36 | 4.44E-34 |
| 197 | HIST1H2AC | 1.538272 | 2.060375 | 0.50577  | 1.658262 | 2.24E-35 | 1.25E-33 |
| 198 | DDIT3     | 0.988941 | 2.778773 | 0.503919 | 1.655196 | 4.13E-35 | 2.28E-33 |
| 199 | MT1X      | 8.212007 | 0.998223 | 0.502192 | 1.652339 | 7.28E-35 | 4.01E-33 |
| 200 | VCAN      | 0.29549  | 7.493307 | 0.499719 | 1.648258 | 1.64E-34 | 8.97E-33 |
| 201 | ZNF778    | 0.139839 | 14.97458 | 0.498324 | 1.645961 | 2.58E-34 | 1.41E-32 |
| 202 | LOX       | 0.070606 | 28.91498 | 0.498134 | 1.645648 | 2.74E-34 | 1.49E-32 |
| 203 | LIF       | 2.178442 | 1.658488 | 0.494316 | 1.639376 | 9.43E-34 | 5.09E-32 |
| 204 | NUMBL     | 0.138755 | 14.98382 | 0.491547 | 1.634843 | 2.29E-33 | 1.23E-31 |
| 205 | ELF3      | 2.404905 | 1.564647 | 0.48908  | 1.630816 | 5.03E-33 | 2.69E-31 |
| 206 | SERPINB1  | 10.10383 | 0.939698 | 0.48845  | 1.629789 | 6.14E-33 | 3.27E-31 |
| 207 | ID2       | 0.272889 | 7.950052 | 0.487036 | 1.627485 | 9.61E-33 | 5.09E-31 |
| 208 | SCD       | 0.230175 | 9.28196  | 0.486457 | 1.626544 | 1.15E-32 | 6.08E-31 |
| 209 | TFPI      | 0.752566 | 3.33136  | 0.47942  | 1.615137 | 1.04E-31 | 5.46E-30 |
| 210 | GJB2      | 5.533565 | 1.086293 | 0.475298 | 1.608493 | 3.71E-31 | 1.94E-29 |
| 211 | TPM2      | 4.692049 | 1.149045 | 0.475088 | 1.608155 | 3.96E-31 | 2.06E-29 |
| 212 | CYGB      | 0.343181 | 6.380953 | 0.472557 | 1.604091 | 8.57E-31 | 4.43E-29 |

*Supplementary Table S2. HVGs of lung airway epithelial cells (LAECs) (FDR<0.01).*

|     |              |          |          |          |          |          |          |
|-----|--------------|----------|----------|----------|----------|----------|----------|
| 213 | LAMA4        | 0.028931 | 67.51106 | 0.469353 | 1.598959 | 2.26E-30 | 1.17E-28 |
| 214 | GJB6         | 0.139544 | 14.5656  | 0.468626 | 1.597797 | 2.82E-30 | 1.44E-28 |
| 215 | EMP3         | 1.770688 | 1.813282 | 0.464647 | 1.591453 | 9.29E-30 | 4.73E-28 |
| 216 | RP11-297N6.4 | 0.049143 | 39.71304 | 0.461021 | 1.585692 | 2.72E-29 | 1.38E-27 |
| 217 | EFNA1        | 1.658897 | 1.870167 | 0.455969 | 1.577702 | 1.20E-28 | 6.05E-27 |
| 218 | GATA3        | 0.048338 | 39.90209 | 0.449554 | 1.567612 | 7.64E-28 | 3.84E-26 |
| 219 | IGFBP2       | 8.149336 | 0.948242 | 0.448954 | 1.566673 | 9.06E-28 | 4.54E-26 |
| 220 | SLPI         | 3.186187 | 1.300741 | 0.441794 | 1.555495 | 6.88E-27 | 3.43E-25 |
| 221 | RARRES3      | 7.609456 | 0.951232 | 0.434871 | 1.544764 | 4.70E-26 | 2.33E-24 |
| 222 | AKR1C1       | 0.762154 | 3.150766 | 0.433526 | 1.542688 | 6.79E-26 | 3.35E-24 |
| 223 | NCCRP1       | 0.055646 | 34.19336 | 0.433228 | 1.542228 | 7.37E-26 | 3.62E-24 |
| 224 | IRG1         | 0.07257  | 26.3601  | 0.432336 | 1.540853 | 9.41E-26 | 4.60E-24 |
| 225 | SERPINB5     | 1.063493 | 2.453899 | 0.431955 | 1.540265 | 1.04E-25 | 5.09E-24 |
| 226 | SERPINA1     | 0.475836 | 4.614346 | 0.431777 | 1.539991 | 1.10E-25 | 5.32E-24 |
| 227 | NCF2         | 1.593752 | 1.866297 | 0.429091 | 1.535861 | 2.27E-25 | 1.10E-23 |
| 228 | BIRC3        | 6.481638 | 0.985544 | 0.426414 | 1.531755 | 4.67E-25 | 2.25E-23 |
| 229 | CNKSR3       | 0.178748 | 11.05336 | 0.426311 | 1.531598 | 4.80E-25 | 2.30E-23 |
| 230 | CLMP         | 0.267812 | 7.605456 | 0.425685 | 1.530638 | 5.68E-25 | 2.71E-23 |
| 231 | POU2F2       | 2.582179 | 1.410221 | 0.421781 | 1.524675 | 1.61E-24 | 7.63E-23 |
| 232 | ATF3         | 0.253987 | 7.948156 | 0.421518 | 1.524274 | 1.72E-24 | 8.15E-23 |
| 233 | SYT8         | 0.173626 | 11.29342 | 0.42054  | 1.522784 | 2.23E-24 | 1.05E-22 |
| 234 | KRT6A        | 11.94816 | 0.849444 | 0.420014 | 1.521983 | 2.56E-24 | 1.20E-22 |
| 235 | SPRR2A       | 0.02985  | 62.28018 | 0.41962  | 1.521383 | 2.85E-24 | 1.33E-22 |
| 236 | GoS2         | 151.6594 | 0.706781 | 0.418782 | 1.520109 | 3.55E-24 | 1.65E-22 |
| 237 | ZFP36        | 1.36719  | 2.033134 | 0.416323 | 1.516376 | 6.75E-24 | 3.12E-22 |
| 238 | FILIP1L      | 0.313922 | 6.51299  | 0.413768 | 1.512505 | 1.31E-23 | 6.04E-22 |
| 239 | CDKN2A       | 2.438334 | 1.437392 | 0.411455 | 1.509012 | 2.38E-23 | 1.09E-21 |
| 240 | C1orf68      | 0.043623 | 42.41633 | 0.409769 | 1.50647  | 3.67E-23 | 1.68E-21 |
| 241 | CA2          | 0.388176 | 5.372408 | 0.408766 | 1.50496  | 4.74E-23 | 2.16E-21 |
| 242 | BEX1         | 0.021307 | 85.83769 | 0.406497 | 1.501548 | 8.45E-23 | 3.83E-21 |
| 243 | SERPINE2     | 0.46447  | 4.558695 | 0.399116 | 1.490506 | 5.37E-22 | 2.42E-20 |
| 244 | LRRC75A      | 0.865917 | 2.760278 | 0.398844 | 1.490102 | 5.75E-22 | 2.58E-20 |
| 245 | PNRC1        | 5.125812 | 1.031089 | 0.397746 | 1.488466 | 7.54E-22 | 3.37E-20 |
| 246 | NDRG4        | 0.035654 | 51.12058 | 0.397658 | 1.488335 | 7.71E-22 | 3.44E-20 |
| 247 | S100A12      | 0.071562 | 25.74158 | 0.394986 | 1.484364 | 1.49E-21 | 6.60E-20 |
| 248 | MMP10        | 0.040301 | 45.17012 | 0.394701 | 1.48394  | 1.59E-21 | 7.05E-20 |
| 249 | LINC01436    | 0.118083 | 15.8465  | 0.393663 | 1.482402 | 2.05E-21 | 9.05E-20 |
| 250 | PELI1        | 1.324096 | 2.030156 | 0.393632 | 1.482355 | 2.07E-21 | 9.08E-20 |
| 251 | DUSP1        | 2.609113 | 1.358562 | 0.389698 | 1.476535 | 5.38E-21 | 2.35E-19 |
| 252 | KCNK5        | 0.075029 | 24.45176 | 0.389616 | 1.476414 | 5.48E-21 | 2.39E-19 |
| 253 | MT1M         | 0.048469 | 37.44835 | 0.388729 | 1.475105 | 6.79E-21 | 2.94E-19 |
| 254 | NEDD9        | 0.297969 | 6.61253  | 0.382188 | 1.465487 | 3.22E-20 | 1.39E-18 |
| 255 | CTC-425F1.4  | 0.220765 | 8.682703 | 0.381254 | 1.46412  | 4.01E-20 | 1.72E-18 |

*Supplementary Table S2. HVGs of lung airway epithelial cells (LAECs) (FDR<0.01).*

|     |             |          |          |          |          |          |          |
|-----|-------------|----------|----------|----------|----------|----------|----------|
| 256 | IGFBP3      | 7.798741 | 0.894954 | 0.380164 | 1.462524 | 5.18E-20 | 2.22E-18 |
| 257 | NEURL3      | 1.28723  | 2.040229 | 0.379677 | 1.461813 | 5.80E-20 | 2.48E-18 |
| 258 | ASB2        | 1.115353 | 2.250322 | 0.379071 | 1.460927 | 6.69E-20 | 2.84E-18 |
| 259 | PRDM8       | 0.467133 | 4.43531  | 0.376537 | 1.45723  | 1.20E-19 | 5.10E-18 |
| 260 | SLC44A4     | 0.3689   | 5.429445 | 0.374771 | 1.454658 | 1.81E-19 | 7.64E-18 |
| 261 | HRASLS2     | 0.341377 | 5.798069 | 0.372097 | 1.450773 | 3.34E-19 | 1.40E-17 |
| 262 | ZFP36L2     | 1.156332 | 2.178909 | 0.372063 | 1.450724 | 3.37E-19 | 1.41E-17 |
| 263 | TNNI1       | 0.305202 | 6.392372 | 0.369855 | 1.447525 | 5.57E-19 | 2.32E-17 |
| 264 | BMP2        | 0.740948 | 3.01978  | 0.369092 | 1.44642  | 6.62E-19 | 2.75E-17 |
| 265 | SNAPC1      | 2.35789  | 1.397541 | 0.365746 | 1.441589 | 1.41E-18 | 5.80E-17 |
| 266 | TPM1        | 4.607126 | 1.036865 | 0.365736 | 1.441575 | 1.41E-18 | 5.80E-17 |
| 267 | ADIRF       | 3.889909 | 1.106156 | 0.365357 | 1.441028 | 1.53E-18 | 6.29E-17 |
| 268 | MAP3K8      | 0.830245 | 2.738063 | 0.358911 | 1.431769 | 6.38E-18 | 2.61E-16 |
| 269 | CSF1        | 0.966038 | 2.443224 | 0.358121 | 1.430638 | 7.58E-18 | 3.09E-16 |
| 270 | CHST2       | 0.353214 | 5.544193 | 0.357455 | 1.429686 | 8.77E-18 | 3.56E-16 |
| 271 | MSC         | 0.070821 | 24.98791 | 0.355123 | 1.426356 | 1.45E-17 | 5.88E-16 |
| 272 | MRGPRX3     | 0.28048  | 6.796186 | 0.355058 | 1.426263 | 1.47E-17 | 5.94E-16 |
| 273 | IL20RB      | 0.263512 | 7.189783 | 0.354772 | 1.425855 | 1.57E-17 | 6.30E-16 |
| 274 | HMGB3       | 2.201927 | 1.43393  | 0.354694 | 1.425744 | 1.60E-17 | 6.38E-16 |
| 275 | CXCL1       | 33.92938 | 0.701017 | 0.352835 | 1.423097 | 2.38E-17 | 9.49E-16 |
| 276 | SERPINB13   | 0.059137 | 29.68804 | 0.351496 | 1.421192 | 3.17E-17 | 1.26E-15 |
| 277 | TAGLN3      | 0.434703 | 4.592979 | 0.349995 | 1.419061 | 4.37E-17 | 1.73E-15 |
| 278 | SNPH        | 0.2158   | 8.58522  | 0.348953 | 1.417583 | 5.45E-17 | 2.15E-15 |
| 279 | CHAC1       | 0.147935 | 12.22514 | 0.348841 | 1.417424 | 5.58E-17 | 2.19E-15 |
| 280 | CITED2      | 0.94815  | 2.450936 | 0.347549 | 1.415594 | 7.33E-17 | 2.87E-15 |
| 281 | SLC39A8     | 2.129204 | 1.438423 | 0.339357 | 1.404045 | 4.03E-16 | 1.57E-14 |
| 282 | DSG3        | 0.191989 | 9.434106 | 0.334688 | 1.397504 | 1.04E-15 | 4.05E-14 |
| 283 | INSIG1      | 0.046571 | 36.8735  | 0.334031 | 1.396586 | 1.19E-15 | 4.61E-14 |
| 284 | TM4SF1      | 0.463672 | 4.271415 | 0.332562 | 1.394537 | 1.60E-15 | 6.17E-14 |
| 285 | PNMA2       | 0.108412 | 16.17942 | 0.332506 | 1.394458 | 1.62E-15 | 6.22E-14 |
| 286 | PLA2G4D     | 0.071294 | 24.1807  | 0.32877  | 1.389258 | 3.40E-15 | 1.30E-13 |
| 287 | SNCG        | 0.912039 | 2.46822  | 0.32585  | 1.385207 | 6.05E-15 | 2.31E-13 |
| 288 | KCCAT211    | 0.778525 | 2.776122 | 0.323394 | 1.38181  | 9.77E-15 | 3.72E-13 |
| 289 | CAMK2N1     | 2.388932 | 1.326909 | 0.320777 | 1.378198 | 1.62E-14 | 6.14E-13 |
| 290 | C11orf96    | 0.039416 | 42.87329 | 0.320648 | 1.37802  | 1.66E-14 | 6.28E-13 |
| 291 | GK          | 0.127195 | 13.68867 | 0.318317 | 1.374812 | 2.59E-14 | 9.77E-13 |
| 292 | ID3         | 3.980683 | 1.045515 | 0.318246 | 1.374715 | 2.63E-14 | 9.87E-13 |
| 293 | PPP1R14A    | 0.427204 | 4.510392 | 0.316889 | 1.37285  | 3.41E-14 | 1.27E-12 |
| 294 | ALPL        | 0.083571 | 20.39646 | 0.312952 | 1.367456 | 7.15E-14 | 2.67E-12 |
| 295 | CD200       | 0.184276 | 9.583786 | 0.312147 | 1.366356 | 8.31E-14 | 3.09E-12 |
| 296 | TK1         | 0.1427   | 12.1853  | 0.311427 | 1.365372 | 9.51E-14 | 3.52E-12 |
| 297 | GS1-124K5.4 | 0.084753 | 20.07528 | 0.310693 | 1.36437  | 1.09E-13 | 4.02E-12 |
| 298 | PTGER4      | 0.340551 | 5.45887  | 0.309669 | 1.362974 | 1.32E-13 | 4.85E-12 |

*Supplementary Table S2. HVGs of lung airway epithelial cells (LAECs) (FDR<0.01).*

|     |             |          |          |          |          |          |          |
|-----|-------------|----------|----------|----------|----------|----------|----------|
| 299 | KRT16       | 0.113131 | 15.13806 | 0.306877 | 1.359174 | 2.20E-13 | 8.07E-12 |
| 300 | EGFLAM      | 0.049386 | 33.84237 | 0.305886 | 1.357827 | 2.64E-13 | 9.64E-12 |
| 301 | ERRFI1      | 2.50938  | 1.272827 | 0.304705 | 1.356225 | 3.27E-13 | 1.19E-11 |
| 302 | ALMS1       | 0.113365 | 15.06028 | 0.303709 | 1.354874 | 3.92E-13 | 1.42E-11 |
| 303 | DUSP4       | 2.46182  | 1.283288 | 0.303027 | 1.353951 | 4.43E-13 | 1.60E-11 |
| 304 | TLR2        | 0.198269 | 8.818481 | 0.297181 | 1.346059 | 1.26E-12 | 4.54E-11 |
| 305 | TRAF1       | 0.15672  | 10.99093 | 0.296964 | 1.345767 | 1.31E-12 | 4.70E-11 |
| 306 | ICAM1       | 5.886176 | 0.891101 | 0.296788 | 1.34553  | 1.35E-12 | 4.83E-11 |
| 307 | NPPC        | 0.037736 | 43.69501 | 0.296684 | 1.34539  | 1.37E-12 | 4.91E-11 |
| 308 | CRYAB       | 0.051442 | 32.20685 | 0.296373 | 1.344972 | 1.45E-12 | 5.17E-11 |
| 309 | PVRL4       | 0.279204 | 6.425056 | 0.294778 | 1.342828 | 1.92E-12 | 6.81E-11 |
| 310 | CD70        | 0.038632 | 42.50302 | 0.292168 | 1.339328 | 3.03E-12 | 1.07E-10 |
| 311 | ADAMTS14    | 0.030981 | 52.83218 | 0.29186  | 1.338915 | 3.19E-12 | 1.13E-10 |
| 312 | GPX3        | 0.058662 | 28.1882  | 0.291769 | 1.338794 | 3.24E-12 | 1.14E-10 |
| 313 | ST3GAL4-AS1 | 0.05928  | 27.7986  | 0.288104 | 1.333896 | 6.09E-12 | 2.13E-10 |
| 314 | FOS         | 0.241338 | 7.287793 | 0.288067 | 1.333846 | 6.13E-12 | 2.14E-10 |
| 315 | KLK6        | 0.118569 | 14.18307 | 0.286688 | 1.332009 | 7.75E-12 | 2.70E-10 |
| 316 | RRP12       | 0.483735 | 3.93246  | 0.285806 | 1.330835 | 8.99E-12 | 3.12E-10 |
| 317 | SAA2        | 5.195694 | 0.916728 | 0.284774 | 1.329461 | 1.07E-11 | 3.70E-10 |
| 318 | MAFB        | 0.065628 | 24.942   | 0.279056 | 1.321881 | 2.78E-11 | 9.57E-10 |
| 319 | TRIB3       | 0.363744 | 4.994575 | 0.278923 | 1.321706 | 2.84E-11 | 9.75E-10 |
| 320 | HLA-DPA1    | 0.069501 | 23.55107 | 0.277581 | 1.319933 | 3.54E-11 | 1.21E-09 |
| 321 | HIST1H2BD   | 0.858356 | 2.455664 | 0.275297 | 1.316922 | 5.13E-11 | 1.75E-09 |
| 322 | PRKCDBP     | 0.330595 | 5.41177  | 0.274674 | 1.316102 | 5.68E-11 | 1.93E-09 |
| 323 | STC2        | 0.629737 | 3.120475 | 0.27267  | 1.313467 | 7.84E-11 | 2.66E-09 |
| 324 | BDNF        | 0.326558 | 5.457673 | 0.272192 | 1.31284  | 8.46E-11 | 2.86E-09 |
| 325 | WNT5B       | 0.033403 | 48.04385 | 0.271225 | 1.31157  | 9.88E-11 | 3.33E-09 |
| 326 | ANKRD37     | 0.380366 | 4.761479 | 0.270302 | 1.31036  | 1.14E-10 | 3.85E-09 |
| 327 | LGALS7B     | 0.17042  | 9.885979 | 0.269934 | 1.309878 | 1.21E-10 | 4.07E-09 |
| 328 | ITGB8       | 0.502394 | 3.748529 | 0.269805 | 1.309709 | 1.24E-10 | 4.14E-09 |
| 329 | RARRES1     | 0.400649 | 4.546977 | 0.269475 | 1.309277 | 1.31E-10 | 4.35E-09 |
| 330 | PRR15       | 0.363436 | 4.946073 | 0.268421 | 1.307898 | 1.54E-10 | 5.12E-09 |
| 331 | HIST1H4H    | 0.082653 | 19.68727 | 0.266863 | 1.305861 | 1.97E-10 | 6.53E-09 |
| 332 | AF127936.7  | 0.464304 | 3.993267 | 0.266384 | 1.305237 | 2.12E-10 | 7.01E-09 |
| 333 | TRBC2       | 0.116216 | 14.13743 | 0.264278 | 1.30249  | 2.95E-10 | 9.71E-09 |
| 334 | HLA-G       | 0.983843 | 2.193368 | 0.263584 | 1.301586 | 3.28E-10 | 1.08E-08 |
| 335 | FLRT3       | 0.161829 | 10.28549 | 0.260884 | 1.298078 | 4.98E-10 | 1.63E-08 |
| 336 | GBP5        | 0.731093 | 2.733533 | 0.259028 | 1.29567  | 6.60E-10 | 2.15E-08 |
| 337 | ICAM2       | 0.118063 | 13.83926 | 0.258062 | 1.29442  | 7.65E-10 | 2.49E-08 |
| 338 | CST6        | 7.528953 | 0.797232 | 0.255505 | 1.291114 | 1.12E-09 | 3.64E-08 |
| 339 | DUOX2       | 1.624878 | 1.54823  | 0.254271 | 1.289522 | 1.35E-09 | 4.37E-08 |
| 340 | APLN        | 0.105928 | 15.29065 | 0.253736 | 1.288831 | 1.46E-09 | 4.72E-08 |
| 341 | TGFBI       | 4.53309  | 0.931167 | 0.25228  | 1.286956 | 1.81E-09 | 5.83E-08 |

*Supplementary Table S2. HVGs of lung airway epithelial cells (LAECs) (FDR<0.01).*

|     |               |          |          |          |          |          |          |
|-----|---------------|----------|----------|----------|----------|----------|----------|
| 342 | IDO1          | 2.363911 | 1.243936 | 0.25066  | 1.284873 | 2.30E-09 | 7.38E-08 |
| 343 | SEMA3B        | 0.252939 | 6.720662 | 0.24999  | 1.284012 | 2.54E-09 | 8.12E-08 |
| 344 | CRABP2        | 1.385018 | 1.706046 | 0.249444 | 1.283312 | 2.75E-09 | 8.76E-08 |
| 345 | FHL1          | 0.135608 | 12.00953 | 0.248467 | 1.282058 | 3.17E-09 | 1.01E-07 |
| 346 | NDRG1         | 1.050598 | 2.060071 | 0.248301 | 1.281846 | 3.25E-09 | 1.03E-07 |
| 347 | SLC7A2        | 0.116518 | 13.85619 | 0.246669 | 1.279755 | 4.11E-09 | 1.30E-07 |
| 348 | ZNF667-AS1    | 0.862764 | 2.376576 | 0.246425 | 1.279443 | 4.26E-09 | 1.34E-07 |
| 349 | RP11-384O8.1  | 0.161237 | 10.16862 | 0.246004 | 1.278905 | 4.52E-09 | 1.42E-07 |
| 350 | HIP1R         | 0.250703 | 6.748031 | 0.245948 | 1.278833 | 4.56E-09 | 1.43E-07 |
| 351 | FGF2          | 2.018302 | 1.348742 | 0.244999 | 1.27762  | 5.23E-09 | 1.63E-07 |
| 352 | KIT           | 0.030184 | 51.67617 | 0.24396  | 1.276293 | 6.06E-09 | 1.89E-07 |
| 353 | C1QTNF1-AS1   | 0.10998  | 14.60129 | 0.243673 | 1.275927 | 6.31E-09 | 1.96E-07 |
| 354 | KISS1         | 0.050088 | 31.29963 | 0.241629 | 1.273321 | 8.43E-09 | 2.61E-07 |
| 355 | RP11-95M15.1  | 0.438258 | 4.087299 | 0.240342 | 1.271684 | 1.01E-08 | 3.12E-07 |
| 356 | FAM110C       | 0.875345 | 2.334729 | 0.239556 | 1.270685 | 1.13E-08 | 3.47E-07 |
| 357 | CAPN12        | 0.24435  | 6.863296 | 0.239415 | 1.270505 | 1.15E-08 | 3.53E-07 |
| 358 | AKR1B10       | 0.133243 | 12.09926 | 0.239168 | 1.270192 | 1.19E-08 | 3.65E-07 |
| 359 | PCDH17        | 0.13024  | 12.36324 | 0.239039 | 1.270028 | 1.21E-08 | 3.70E-07 |
| 360 | LXN           | 0.208754 | 7.928182 | 0.238607 | 1.26948  | 1.29E-08 | 3.92E-07 |
| 361 | TREM1         | 0.147034 | 10.99752 | 0.237228 | 1.26773  | 1.56E-08 | 4.73E-07 |
| 362 | CYP3A5        | 0.042828 | 36.34043 | 0.237073 | 1.267534 | 1.59E-08 | 4.82E-07 |
| 363 | SOX4          | 1.445921 | 1.638446 | 0.237045 | 1.267498 | 1.60E-08 | 4.83E-07 |
| 364 | PAG1          | 0.130057 | 12.33936 | 0.235761 | 1.265872 | 1.91E-08 | 5.75E-07 |
| 365 | PRDM1         | 0.821944 | 2.438345 | 0.235323 | 1.265317 | 2.03E-08 | 6.08E-07 |
| 366 | EXOC3L4       | 0.045003 | 34.48427 | 0.233365 | 1.262842 | 2.65E-08 | 7.93E-07 |
| 367 | DKK3          | 0.604114 | 3.099196 | 0.232146 | 1.261303 | 3.12E-08 | 9.32E-07 |
| 368 | RP11-456O19.2 | 0.035672 | 43.29901 | 0.232099 | 1.261244 | 3.14E-08 | 9.36E-07 |
| 369 | RP11-402P6.11 | 0.140747 | 11.39774 | 0.231528 | 1.260525 | 3.39E-08 | 1.01E-06 |
| 370 | S1PR3         | 0.285436 | 5.911877 | 0.231483 | 1.260468 | 3.41E-08 | 1.01E-06 |
| 371 | PLPP3         | 0.308894 | 5.506427 | 0.231439 | 1.260412 | 3.43E-08 | 1.01E-06 |
| 372 | LINC00936     | 0.065044 | 23.93239 | 0.229004 | 1.257347 | 4.76E-08 | 1.40E-06 |
| 373 | PTPRR         | 0.060492 | 25.68214 | 0.228708 | 1.256976 | 4.95E-08 | 1.45E-06 |
| 374 | DNAJB4        | 0.298351 | 5.644892 | 0.225125 | 1.252479 | 7.94E-08 | 2.33E-06 |
| 375 | HSPA1A        | 0.780794 | 2.50876  | 0.224375 | 1.25154  | 8.75E-08 | 2.56E-06 |
| 376 | ALOX15B       | 0.174924 | 9.203326 | 0.222871 | 1.249659 | 1.06E-07 | 3.10E-06 |
| 377 | TGFB2         | 0.341724 | 4.963851 | 0.217655 | 1.243158 | 2.07E-07 | 6.03E-06 |
| 378 | NRG1          | 0.221369 | 7.348226 | 0.216904 | 1.242224 | 2.28E-07 | 6.61E-06 |
| 379 | CEACAM6       | 0.106941 | 14.5925  | 0.216152 | 1.241291 | 2.50E-07 | 7.24E-06 |
| 380 | PHKG1         | 0.423745 | 4.106761 | 0.216136 | 1.241271 | 2.51E-07 | 7.24E-06 |
| 381 | ACKR3         | 1.335012 | 1.687814 | 0.214416 | 1.239138 | 3.11E-07 | 8.95E-06 |
| 382 | TNC           | 0.464867 | 3.779681 | 0.212445 | 1.236698 | 3.97E-07 | 1.14E-05 |
| 383 | IRS2          | 0.360933 | 4.702302 | 0.211801 | 1.235902 | 4.30E-07 | 1.23E-05 |
| 384 | ZBED2         | 0.92081  | 2.185897 | 0.211486 | 1.235513 | 4.46E-07 | 1.27E-05 |

*Supplementary Table S2. HVGs of lung airway epithelial cells (LAECs) (FDR<0.01).*

|     |               |          |          |          |          |          |          |
|-----|---------------|----------|----------|----------|----------|----------|----------|
| 385 | RP11-538P18.2 | 0.217347 | 7.416996 | 0.209288 | 1.2328   | 5.84E-07 | 1.66E-05 |
| 386 | ACTA2         | 0.430981 | 4.016452 | 0.208476 | 1.2318   | 6.44E-07 | 1.83E-05 |
| 387 | GALNT5        | 0.284717 | 5.777392 | 0.206193 | 1.228991 | 8.47E-07 | 2.40E-05 |
| 388 | UPP1          | 2.860597 | 1.080433 | 0.205892 | 1.22862  | 8.78E-07 | 2.48E-05 |
| 389 | PTN           | 0.013831 | 107.6242 | 0.203325 | 1.225471 | 1.19E-06 | 3.35E-05 |
| 390 | PSG5          | 0.06628  | 22.87868 | 0.202349 | 1.224276 | 1.33E-06 | 3.75E-05 |
| 391 | CSF3          | 6.526953 | 0.78594  | 0.202114 | 1.223988 | 1.37E-06 | 3.84E-05 |
| 392 | TMPRSS2       | 0.086917 | 17.56346 | 0.201441 | 1.223164 | 1.48E-06 | 4.15E-05 |
| 393 | NKAIN4        | 0.039678 | 37.78772 | 0.2009   | 1.222502 | 1.58E-06 | 4.40E-05 |
| 394 | KCNQ4         | 0.265915 | 6.113639 | 0.200885 | 1.222485 | 1.58E-06 | 4.40E-05 |
| 395 | CDC20         | 0.148177 | 10.50203 | 0.198465 | 1.219529 | 2.09E-06 | 5.81E-05 |
| 396 | FAM107B       | 0.548891 | 3.237891 | 0.197209 | 1.217999 | 2.42E-06 | 6.69E-05 |
| 397 | CITED4        | 0.976057 | 2.063307 | 0.196659 | 1.217329 | 2.57E-06 | 7.10E-05 |
| 398 | SELM          | 2.020536 | 1.283855 | 0.196321 | 1.216917 | 2.67E-06 | 7.36E-05 |
| 399 | ALDH1A1       | 0.115046 | 13.33221 | 0.195942 | 1.216457 | 2.79E-06 | 7.67E-05 |
| 400 | CTD-2008A1.3  | 0.048088 | 31.07767 | 0.194506 | 1.214711 | 3.28E-06 | 8.99E-05 |
| 401 | BBC3          | 3.01046  | 1.042614 | 0.194462 | 1.214658 | 3.30E-06 | 9.01E-05 |
| 402 | CCAT1         | 0.047565 | 31.36429 | 0.192954 | 1.212827 | 3.90E-06 | 0.000106 |
| 403 | UNC5B-AS1     | 0.044147 | 33.74847 | 0.192923 | 1.212789 | 3.92E-06 | 0.000107 |
| 404 | PSAT1         | 0.493906 | 3.521049 | 0.192862 | 1.212715 | 3.94E-06 | 0.000107 |
| 405 | ALDH1A3       | 2.339425 | 1.179703 | 0.192131 | 1.211829 | 4.28E-06 | 0.000116 |
| 406 | PGF           | 1.417993 | 1.584508 | 0.190918 | 1.210361 | 4.89E-06 | 0.000132 |
| 407 | SGCE          | 0.057693 | 25.82901 | 0.18806  | 1.206906 | 6.69E-06 | 0.00018  |
| 408 | HIST1H2BC     | 0.427892 | 3.956009 | 0.187126 | 1.20578  | 7.41E-06 | 0.000199 |
| 409 | IL11          | 0.061827 | 24.11506 | 0.187078 | 1.205721 | 7.45E-06 | 0.0002   |
| 410 | NAV3          | 0.243016 | 6.545191 | 0.186944 | 1.20556  | 7.55E-06 | 0.000202 |
| 411 | BBOX1-AS1     | 0.022716 | 64.64566 | 0.186463 | 1.20498  | 7.96E-06 | 0.000212 |
| 412 | PAQR7         | 0.573716 | 3.085834 | 0.185599 | 1.203939 | 8.73E-06 | 0.000232 |
| 413 | LGALS7        | 0.385105 | 4.325182 | 0.185014 | 1.203235 | 9.30E-06 | 0.000247 |
| 414 | NDRG2         | 0.127444 | 11.93478 | 0.183077 | 1.200907 | 1.14E-05 | 0.000302 |
| 415 | C6orf58       | 0.044903 | 32.85737 | 0.182857 | 1.200642 | 1.17E-05 | 0.000309 |
| 416 | LINC01133     | 0.43713  | 3.867352 | 0.182817 | 1.200595 | 1.17E-05 | 0.000309 |
| 417 | CAPNS2        | 1.118822 | 1.841574 | 0.180802 | 1.198178 | 1.45E-05 | 0.000381 |
| 418 | MGAM          | 0.059328 | 24.93516 | 0.180188 | 1.197442 | 1.55E-05 | 0.000406 |
| 419 | NINJ1         | 7.43887  | 0.740216 | 0.178159 | 1.195015 | 1.91E-05 | 0.000499 |
| 420 | MRGPRX4       | 0.03993  | 36.60537 | 0.17536  | 1.191676 | 2.54E-05 | 0.000663 |
| 421 | DUSP2         | 0.181145 | 8.487587 | 0.174653 | 1.190833 | 2.73E-05 | 0.000711 |
| 422 | TMEM47        | 0.08298  | 17.84214 | 0.172279 | 1.188009 | 3.46E-05 | 0.000899 |
| 423 | S100A14       | 27.21845 | 0.595567 | 0.17215  | 1.187856 | 3.51E-05 | 0.000909 |
| 424 | SLCO4A1       | 0.421254 | 3.948741 | 0.171814 | 1.187457 | 3.63E-05 | 0.000938 |
| 425 | SDPR          | 0.188655 | 8.141208 | 0.170954 | 1.186437 | 3.95E-05 | 0.001019 |
| 426 | ZNF19         | 0.029981 | 48.33648 | 0.170492 | 1.185889 | 4.13E-05 | 0.001064 |
| 427 | SSPN          | 0.415413 | 3.988089 | 0.169674 | 1.184918 | 4.48E-05 | 0.00115  |

*Supplementary Table S2. HVGs of lung airway epithelial cells (LAECs) (FDR<0.01).*

|     |         |          |          |          |          |          |          |
|-----|---------|----------|----------|----------|----------|----------|----------|
| 428 | GPX2    | 1.037469 | 1.921467 | 0.169634 | 1.184871 | 4.50E-05 | 0.001152 |
| 429 | RRM2B   | 0.766095 | 2.405969 | 0.167835 | 1.182741 | 5.36E-05 | 0.00137  |
| 430 | MFAP2   | 0.226233 | 6.844233 | 0.16589  | 1.180444 | 6.47E-05 | 0.001649 |
| 431 | SOX7    | 1.74119  | 1.355254 | 0.163403 | 1.177511 | 8.20E-05 | 0.002085 |
| 432 | ZFP57   | 0.147321 | 10.19509 | 0.163317 | 1.17741  | 8.27E-05 | 0.002096 |
| 433 | MRAS    | 0.156751 | 9.613986 | 0.163299 | 1.177388 | 8.28E-05 | 0.002096 |
| 434 | FA2H    | 0.104581 | 14.10617 | 0.160795 | 1.174444 | 0.000105 | 0.002645 |
| 435 | TMPRSS4 | 0.51973  | 3.266204 | 0.1605   | 1.174098 | 0.000108 | 0.002712 |
| 436 | LRRC8B  | 0.342132 | 4.682916 | 0.160451 | 1.17404  | 0.000108 | 0.002719 |
| 437 | HEG1    | 0.394798 | 4.128502 | 0.160138 | 1.173673 | 0.000111 | 0.002792 |
| 438 | IZUMO4  | 0.59429  | 2.922203 | 0.159974 | 1.173481 | 0.000113 | 0.002829 |
| 439 | CSTA    | 16.60954 | 0.621542 | 0.159826 | 1.173307 | 0.000115 | 0.002861 |
| 440 | GPAT3   | 0.067051 | 21.66174 | 0.158973 | 1.172306 | 0.000124 | 0.003089 |
| 441 | KISS1R  | 0.092626 | 15.81792 | 0.158294 | 1.171511 | 0.000132 | 0.00328  |
| 442 | KLK10   | 3.26289  | 0.969177 | 0.158269 | 1.171482 | 0.000132 | 0.00328  |
| 443 | CDKN2D  | 0.515721 | 3.274923 | 0.15669  | 1.169632 | 0.000153 | 0.003781 |
| 444 | INA     | 0.204828 | 7.428829 | 0.155941 | 1.168757 | 0.000164 | 0.004037 |
| 445 | SRGAP3  | 0.143018 | 10.40815 | 0.1559   | 1.168709 | 0.000164 | 0.004043 |
| 446 | IGFBP6  | 14.4719  | 0.631035 | 0.154903 | 1.167544 | 0.00018  | 0.004406 |
| 447 | B3GNT7  | 0.177034 | 8.502417 | 0.154896 | 1.167537 | 0.00018  | 0.004406 |
| 448 | GLIPR1  | 0.502554 | 3.340048 | 0.154694 | 1.167301 | 0.000183 | 0.004476 |
| 449 | GPRC5A  | 3.332971 | 0.956042 | 0.154081 | 1.166585 | 0.000193 | 0.004719 |
| 450 | PLAC8   | 0.566019 | 3.018372 | 0.152382 | 1.164605 | 0.000225 | 0.005476 |
| 451 | CORO1A  | 0.401575 | 4.03517  | 0.152065 | 1.164236 | 0.000231 | 0.005619 |
| 452 | ENC1    | 0.578869 | 2.960992 | 0.151643 | 1.163745 | 0.00024  | 0.005819 |
| 453 | CXCL14  | 0.037151 | 38.38116 | 0.151611 | 1.163708 | 0.000241 | 0.005823 |
| 454 | LIMD2   | 0.521447 | 3.225531 | 0.150724 | 1.162676 | 0.00026  | 0.00628  |
| 455 | LYPD3   | 0.145256 | 10.19833 | 0.150256 | 1.162132 | 0.000271 | 0.006529 |
| 456 | TGM1    | 0.341657 | 4.637465 | 0.149467 | 1.161216 | 0.00029  | 0.006977 |
| 457 | RASD1   | 0.058231 | 24.62141 | 0.149272 | 1.160989 | 0.000295 | 0.007081 |
| 458 | VAMP5   | 1.002364 | 1.92891  | 0.148659 | 1.160277 | 0.000311 | 0.007451 |
| 459 | EDNRA   | 0.192267 | 7.821068 | 0.148528 | 1.160125 | 0.000315 | 0.007519 |
| 460 | RGMB    | 0.731571 | 2.445817 | 0.148324 | 1.159889 | 0.00032  | 0.007636 |
| 461 | ALOX5AP | 0.034922 | 40.65659 | 0.148158 | 1.159696 | 0.000325 | 0.007729 |
| 462 | WNT7B   | 0.968194 | 1.97704  | 0.148035 | 1.159554 | 0.000328 | 0.007794 |
| 463 | KANK3   | 0.028442 | 49.77033 | 0.147615 | 1.159066 | 0.000341 | 0.008064 |
| 464 | HES1    | 3.062057 | 0.985963 | 0.146505 | 1.157781 | 0.000374 | 0.008847 |
| 465 | STMN1   | 1.257285 | 1.640465 | 0.145703 | 1.156853 | 0.000401 | 0.009451 |
| 466 | HILPDA  | 0.558703 | 3.030023 | 0.145507 | 1.156625 | 0.000408 | 0.00959  |

Supplementary Table S3. HVGs of dermal fibroblasts (DFs) (FDR<0.01).

Supplementary Table S3. HVGs of dermal fibroblasts (DFs) (FDR<0.01).

| ID | genes    | u           | cv2         | residualcv2 | ftratio     | pval       | fdr       |
|----|----------|-------------|-------------|-------------|-------------|------------|-----------|
| 1  | LCE1F    | 0.11622394  | 257.1515656 | 3.195180187 | 24.41457248 | 0          | 0         |
| 2  | KCNMA1   | 2.710607015 | 11.76021911 | 2.432720858 | 11.38983007 | 0          | 0         |
| 3  | PI16     | 1.332664816 | 14.23769248 | 2.268882944 | 9.668594413 | 0          | 0         |
| 4  | ACAN     | 0.145091485 | 74.85891421 | 2.16875446  | 8.747382037 | 0          | 0         |
| 5  | IGFBP5   | 0.169774619 | 58.38787051 | 2.065371893 | 7.888230927 | 0          | 0         |
| 6  | COMP     | 1.333464644 | 10.98555331 | 2.009923829 | 7.46274888  | 0          | 0         |
| 7  | KRTAP2-3 | 2.089282285 | 7.488008796 | 1.865672228 | 6.460277203 | 0          | 0         |
| 8  | SFRP2    | 1.443987489 | 8.6424341   | 1.816052714 | 6.147544377 | 0          | 0         |
| 9  | LCE3D    | 0.028694705 | 240.2860487 | 1.772904572 | 5.887930469 | 0          | 0         |
| 10 | KRT19    | 0.766784531 | 12.21755918 | 1.755518775 | 5.786448827 | 0          | 0         |
| 11 | KRT81    | 0.171641985 | 40.56672553 | 1.711249443 | 5.535873915 | 0          | 0         |
| 12 | FLG      | 0.02066746  | 283.6378855 | 1.61478982  | 5.026831275 | 0          | 0         |
| 13 | KRT14    | 0.062139907 | 94.9320355  | 1.599725874 | 4.951674857 | 0          | 0         |
| 14 | GoS2     | 0.08644807  | 67.12607943 | 1.570984932 | 4.811384746 | 0          | 0         |
| 15 | CXCL1    | 0.149379154 | 37.53743847 | 1.505517702 | 4.506486045 | 0          | 0         |
| 16 | CPB1     | 0.018432075 | 272.2695607 | 1.460580035 | 4.308457861 | 0          | 0         |
| 17 | MMP3     | 2.005975452 | 4.984338995 | 1.439079766 | 4.216813575 | 0          | 0         |
| 18 | RGCC     | 0.308576538 | 17.40860048 | 1.387840332 | 4.006188666 | 0          | 0         |
| 19 | CLU      | 1.385364019 | 5.494412163 | 1.339337132 | 3.816512822 | 2.470E-323 | 1.03E-320 |
| 20 | KRT17    | 0.028399879 | 154.7717589 | 1.32285108  | 3.754109399 | 2.128E-313 | 8.43E-311 |
| 21 | STMN2    | 0.183005172 | 25.74896686 | 1.315331216 | 3.725984885 | 0.00E+00   | 2.39E-306 |
| 22 | PTX3     | 0.659102206 | 8.603949805 | 1.294743942 | 3.650061226 | 6.59E-297  | 2.37E-294 |
| 23 | MGP      | 0.053060282 | 75.21416185 | 1.213580835 | 3.365514453 | 9.73E-253  | 3.35E-250 |
| 24 | TFPI2    | 0.476864436 | 10.1519237  | 1.210391444 | 3.354797609 | 4.20E-251  | 1.39E-248 |
| 25 | MMP1     | 0.622843624 | 8.239416434 | 1.209134578 | 3.350583729 | 1.84E-250  | 5.84E-248 |
| 26 | CTSC     | 0.622497506 | 8.19315101  | 1.203084922 | 3.330375039 | 2.19E-247  | 6.68E-245 |
| 27 | PCP4     | 0.025014179 | 152.2046013 | 1.180939767 | 3.257433994 | 2.36E-236  | 6.93E-234 |
| 28 | MT1X     | 0.731227567 | 7.015367912 | 1.166685808 | 3.21133201  | 1.96E-229  | 5.53E-227 |
| 29 | ACTC1    | 2.798823965 | 3.214096718 | 1.148621656 | 3.153842833 | 7.16E-221  | 1.96E-218 |
| 30 | GAL      | 0.410660847 | 10.41962177 | 1.115194016 | 3.050159901 | 1.31E-205  | 3.46E-203 |
| 31 | ACTA2    | 0.764502926 | 6.434854792 | 1.112249563 | 3.041192058 | 2.66E-204  | 6.81E-202 |
| 32 | HIST1H4C | 0.717467951 | 6.261606512 | 1.039264576 | 2.827137105 | 1.19E-173  | 2.95E-171 |
| 33 | LUM      | 1.046949605 | 4.773762192 | 1.027338929 | 2.793621907 | 5.85E-169  | 1.41E-166 |
| 34 | PPP1R14A | 0.238261486 | 14.66259438 | 0.98991847  | 2.691015065 | 8.58E-155  | 2.00E-152 |
| 35 | RARRES2  | 0.277495765 | 12.38108508 | 0.955049549 | 2.598799347 | 2.50E-142  | 5.66E-140 |
| 36 | PENK     | 0.161902316 | 19.10913395 | 0.904760877 | 2.471340897 | 1.49E-125  | 3.29E-123 |
| 37 | DCN      | 8.536137133 | 1.808968066 | 0.891066    | 2.437726884 | 3.20E-121  | 6.86E-119 |
| 38 | DKK1     | 6.575192121 | 1.901119743 | 0.887862389 | 2.429929851 | 3.20E-120  | 6.66E-118 |
| 39 | SERPINE2 | 10.70646564 | 1.681350762 | 0.855523153 | 2.352604831 | 1.94E-110  | 3.94E-108 |
| 40 | SCG5     | 0.405919234 | 8.075299376 | 0.850753251 | 2.341409858 | 4.84E-109  | 9.59E-107 |



Supplementary Table S3. HVGs of dermal fibroblasts (DFs) (FDR<0.01).

|    |           |             |             |             |             |           |           |
|----|-----------|-------------|-------------|-------------|-------------|-----------|-----------|
| 41 | CEMIP     | 1.322792105 | 3.447067322 | 0.846136103 | 2.330624141 | 1.06E-107 | 2.05E-105 |
| 42 | OLFM2     | 0.472448981 | 7.092601032 | 0.844336702 | 2.326434184 | 3.52E-107 | 6.64E-105 |
| 43 | GRB14     | 0.016233113 | 161.8995943 | 0.814871002 | 2.258884263 | 6.77E-99  | 1.25E-96  |
| 44 | SFRP4     | 0.02730878  | 95.71149818 | 0.803627141 | 2.233627937 | 7.57E-96  | 1.36E-93  |
| 45 | KRTAP1-5  | 0.417855246 | 7.471794096 | 0.796898079 | 2.218648172 | 4.72E-94  | 8.32E-92  |
| 46 | IGFBP7    | 4.470026615 | 1.910636948 | 0.792457203 | 2.208817275 | 7.03E-93  | 1.21E-90  |
| 47 | IL1RL1    | 0.120287755 | 22.49071424 | 0.790972246 | 2.20553971  | 1.73E-92  | 2.91E-90  |
| 48 | PTTG1     | 0.658360469 | 5.199809153 | 0.790308279 | 2.204075791 | 2.58E-92  | 4.25E-90  |
| 49 | NMB       | 0.469429269 | 6.723609093 | 0.785770754 | 2.194097397 | 3.93E-91  | 6.36E-89  |
| 50 | KRT34     | 0.162173513 | 16.88959977 | 0.782834661 | 2.187664773 | 2.27E-90  | 3.60E-88  |
| 51 | TNFRSF11B | 0.825218271 | 4.264411315 | 0.754721724 | 2.127019542 | 2.73E-83  | 4.24E-81  |
| 52 | POSTN     | 0.482966559 | 6.367864914 | 0.754144423 | 2.125791967 | 3.78E-83  | 5.76E-81  |
| 53 | PGF       | 0.727553143 | 4.613866805 | 0.744008313 | 2.10435354  | 1.09E-80  | 1.63E-78  |
| 54 | KRT16     | 0.012994266 | 185.9260266 | 0.732389522 | 2.080044987 | 6.30E-78  | 9.25E-76  |
| 55 | AKR1C1    | 0.552787794 | 5.548831567 | 0.722624149 | 2.059831429 | 1.19E-75  | 1.71E-73  |
| 56 | STC1      | 0.063695679 | 37.83992291 | 0.703865414 | 2.021551758 | 2.11E-71  | 2.99E-69  |
| 57 | PSG5      | 2.238111629 | 2.23204384  | 0.687477379 | 1.988692483 | 8.17E-68  | 1.14E-65  |
| 58 | MT1E      | 1.584870766 | 2.610027187 | 0.670565572 | 1.955342896 | 3.11E-64  | 4.25E-62  |
| 59 | ATF5      | 0.533666087 | 5.37423043  | 0.663272376 | 1.941134073 | 9.99E-63  | 1.34E-60  |
| 60 | LHX9      | 0.011148444 | 201.6538261 | 0.661349865 | 1.937405806 | 2.47E-62  | 3.26E-60  |
| 61 | ANKRD1    | 0.038921668 | 58.56297915 | 0.660729251 | 1.936203799 | 3.31E-62  | 4.30E-60  |
| 62 | SMYD3     | 0.480627874 | 5.821846958 | 0.660625243 | 1.936002429 | 3.47E-62  | 4.44E-60  |
| 63 | KRT7      | 2.345035438 | 2.121825765 | 0.657998569 | 1.930923853 | 1.19E-61  | 1.50E-59  |
| 64 | CRIP1     | 1.560540255 | 2.597098407 | 0.657133708 | 1.929254594 | 1.78E-61  | 2.20E-59  |
| 65 | ADH1B     | 0.013215627 | 168.2803069 | 0.649447892 | 1.914483536 | 6.23E-60  | 7.59E-58  |
| 66 | ADIRF     | 7.262058066 | 1.461762773 | 0.646500972 | 1.908850011 | 2.40E-59  | 2.88E-57  |
| 67 | FST       | 0.635122366 | 4.59495802  | 0.639833088 | 1.89616436  | 4.91E-58  | 5.81E-56  |
| 68 | CDKN3     | 0.401934486 | 6.588717289 | 0.639165877 | 1.894899641 | 6.63E-58  | 7.73E-56  |
| 69 | STMN1     | 1.019165102 | 3.281631167 | 0.635118334 | 1.887245454 | 4.05E-57  | 4.65E-55  |
| 70 | HSPB7     | 2.073515128 | 2.169616807 | 0.623304043 | 1.865080178 | 7.31E-55  | 8.27E-53  |
| 71 | SPON2     | 0.375154584 | 6.790549753 | 0.6120862   | 1.844274914 | 9.00E-53  | 1.00E-50  |
| 72 | NEFM      | 0.044094929 | 49.36047491 | 0.611906657 | 1.843943817 | 9.71E-53  | 1.07E-50  |
| 73 | DPP4      | 0.085879601 | 25.70052041 | 0.604612088 | 1.830541981 | 2.08E-51  | 2.26E-49  |
| 74 | UCHL1     | 0.923323912 | 3.397685824 | 0.60448746  | 1.83031386  | 2.20E-51  | 2.35E-49  |
| 75 | IGF1      | 0.057211102 | 38.00022516 | 0.604030476 | 1.829477626 | 2.66E-51  | 2.81E-49  |
| 76 | CRLF1     | 0.494860838 | 5.360063284 | 0.601207735 | 1.824320766 | 8.57E-51  | 8.94E-49  |
| 77 | Sl00A2    | 0.30732414  | 7.875652405 | 0.591152134 | 1.806068049 | 5.26E-49  | 5.41E-47  |
| 78 | SERPINB2  | 0.111187578 | 19.678769   | 0.583254799 | 1.791861097 | 1.25E-47  | 1.27E-45  |
| 79 | BAMBI     | 0.183084982 | 12.31089383 | 0.577818968 | 1.782147268 | 1.07E-46  | 1.08E-44  |
| 80 | CYP1B1    | 0.748384797 | 3.820023235 | 0.575534097 | 1.77807994  | 2.63E-46  | 2.60E-44  |
| 81 | ADAMTS1   | 1.10262529  | 2.915593158 | 0.567378951 | 1.763638405 | 6.19E-45  | 6.05E-43  |
| 82 | IGFBP2    | 0.240869619 | 9.485022238 | 0.564001226 | 1.757691369 | 2.25E-44  | 2.17E-42  |
| 83 | TGM2      | 0.205168072 | 10.86852744 | 0.556543125 | 1.744631092 | 3.76E-43  | 3.59E-41  |

Supplementary Table S3. HVGs of dermal fibroblasts (DFs) (FDR<0.01).

|     |          |             |             |             |             |          |          |
|-----|----------|-------------|-------------|-------------|-------------|----------|----------|
| 84  | NQO1     | 2.975916898 | 1.711582141 | 0.54285619  | 1.720915109 | 5.81E-41 | 5.49E-39 |
| 85  | HIST1H1C | 0.440066764 | 5.549013409 | 0.541640347 | 1.718824019 | 9.03E-41 | 8.42E-39 |
| 86  | TNNT1    | 0.10077774  | 20.69405889 | 0.54044742  | 1.71677481  | 1.39E-40 | 1.28E-38 |
| 87  | LSP1     | 0.098652524 | 21.07003547 | 0.538201366 | 1.712923167 | 3.11E-40 | 2.84E-38 |
| 88  | TUBA1B   | 10.13944349 | 1.229797742 | 0.534379495 | 1.706389091 | 1.22E-39 | 1.10E-37 |
| 89  | CYTL1    | 0.033590266 | 59.48878519 | 0.531851928 | 1.702081523 | 2.98E-39 | 2.65E-37 |
| 90  | PRR15    | 0.029453971 | 67.03211603 | 0.521969031 | 1.685342877 | 9.37E-38 | 8.25E-36 |
| 91  | CSRP2    | 0.361682618 | 6.396842068 | 0.521724645 | 1.684931054 | 1.02E-37 | 8.88E-36 |
| 92  | HOXA4    | 0.039849071 | 49.53613731 | 0.516398924 | 1.675981433 | 6.31E-37 | 5.44E-35 |
| 93  | OSR2     | 0.363403733 | 6.329385848 | 0.515110311 | 1.673823133 | 9.78E-37 | 8.33E-35 |
| 94  | CCL26    | 0.367662419 | 6.228650306 | 0.508838362 | 1.663357853 | 8.07E-36 | 6.80E-34 |
| 95  | WNT2     | 0.104547155 | 19.19885614 | 0.500290683 | 1.649200596 | 1.36E-34 | 1.13E-32 |
| 96  | PSG4     | 0.618811679 | 4.070441325 | 0.499060976 | 1.647173808 | 2.03E-34 | 1.67E-32 |
| 97  | MT2A     | 16.61559754 | 1.108486458 | 0.49403043  | 1.638908432 | 1.03E-33 | 8.44E-32 |
| 98  | CFD      | 0.258608608 | 8.300132187 | 0.493369802 | 1.63782608  | 1.28E-33 | 1.03E-31 |
| 99  | AJAP1    | 0.014125225 | 133.7535074 | 0.485902492 | 1.625641475 | 1.37E-32 | 1.10E-30 |
| 100 | CLIC3    | 1.349274391 | 2.36303721  | 0.48020053  | 1.616398506 | 8.18E-32 | 6.48E-30 |
| 101 | COL15A1  | 0.078980881 | 24.42838171 | 0.4735846   | 1.605739824 | 6.27E-31 | 4.92E-29 |
| 102 | MFGE8    | 3.492876964 | 1.500425321 | 0.470603991 | 1.600960867 | 1.55E-30 | 1.21E-28 |
| 103 | NDUFA4L2 | 0.112924347 | 17.19500578 | 0.462970008 | 1.588785691 | 1.53E-29 | 1.18E-27 |
| 104 | UBE2C    | 0.187698984 | 10.69548749 | 0.459833703 | 1.583810579 | 3.86E-29 | 2.94E-27 |
| 105 | JAG1     | 0.033597768 | 55.30934906 | 0.459225512 | 1.582847614 | 4.62E-29 | 3.49E-27 |
| 106 | DPT      | 0.824578047 | 3.141737393 | 0.448652301 | 1.566199996 | 9.88E-28 | 7.39E-26 |
| 107 | LY6K     | 0.198159568 | 10.05792016 | 0.447608963 | 1.564566772 | 1.33E-27 | 9.85E-26 |
| 108 | CSTA     | 0.048713136 | 37.96394784 | 0.446625785 | 1.56302928  | 1.76E-27 | 1.29E-25 |
| 109 | TAGLN    | 12.40049198 | 1.093100988 | 0.445755468 | 1.561669541 | 2.25E-27 | 1.64E-25 |
| 110 | ARRDC2   | 0.054889959 | 33.7291751  | 0.444570229 | 1.559819686 | 3.15E-27 | 2.26E-25 |
| 111 | APOE     | 0.020457049 | 88.90675899 | 0.444556146 | 1.55979772  | 3.16E-27 | 2.26E-25 |
| 112 | HAPLN1   | 0.054832557 | 33.62758764 | 0.440536884 | 1.553541066 | 9.77E-27 | 6.92E-25 |
| 113 | PTGDS    | 0.11904486  | 15.9924915  | 0.440217783 | 1.553045409 | 1.07E-26 | 7.49E-25 |
| 114 | MEST     | 0.03227116  | 56.43257157 | 0.439730419 | 1.552288694 | 1.22E-26 | 8.51E-25 |
| 115 | IFI27    | 0.153254137 | 12.62644487 | 0.439693826 | 1.552231893 | 1.24E-26 | 8.52E-25 |
| 116 | SULF1    | 1.854047938 | 1.904169517 | 0.437730929 | 1.54918801  | 2.13E-26 | 1.46E-24 |
| 117 | THBD     | 0.144316325 | 13.2980345  | 0.435787589 | 1.546180334 | 3.65E-26 | 2.47E-24 |
| 118 | FBXO32   | 0.182174872 | 10.6788255  | 0.431050755 | 1.538873654 | 1.34E-25 | 8.97E-24 |
| 119 | CDKN1A   | 2.486179164 | 1.635099304 | 0.42316904  | 1.526792364 | 1.11E-24 | 7.41E-23 |
| 120 | EFEMP1   | 0.355979471 | 5.837033501 | 0.416772884 | 1.517057926 | 6.00E-24 | 3.96E-22 |
| 121 | ADGRG1   | 0.018716381 | 94.38888205 | 0.416369361 | 1.516445882 | 6.67E-24 | 4.37E-22 |
| 122 | IL12A    | 0.025974804 | 68.16579798 | 0.414842497 | 1.514132241 | 9.92E-24 | 6.45E-22 |
| 123 | CRABP2   | 2.265305368 | 1.68907489  | 0.414268892 | 1.513263977 | 1.15E-23 | 7.42E-22 |
| 124 | PSMC3IP  | 0.074582107 | 24.25690937 | 0.411459647 | 1.509018813 | 2.38E-23 | 1.52E-21 |
| 125 | CLDN11   | 0.616205537 | 3.727946477 | 0.407981568 | 1.503779444 | 5.79E-23 | 3.67E-21 |
| 126 | ZNF124   | 0.014165043 | 122.8583359 | 0.403729976 | 1.497399559 | 1.70E-22 | 1.07E-20 |

Supplementary Table S3. HVGs of dermal fibroblasts (DFs) (FDR<0.01).

|     |          |             |             |             |             |          |          |
|-----|----------|-------------|-------------|-------------|-------------|----------|----------|
| 127 | ITPRIP   | 0.073491961 | 24.41221733 | 0.403669305 | 1.497308712 | 1.72E-22 | 1.08E-20 |
| 128 | CXCL3    | 0.023914011 | 72.96919132 | 0.401344559 | 1.493831893 | 3.09E-22 | 1.91E-20 |
| 129 | GLRX     | 1.774388617 | 1.8772043   | 0.400996811 | 1.493312506 | 3.37E-22 | 2.07E-20 |
| 130 | CEBPD    | 0.457991627 | 4.66538292  | 0.400486194 | 1.49255019  | 3.82E-22 | 2.33E-20 |
| 131 | SOCS2    | 0.617832703 | 3.689977571 | 0.399735276 | 1.491429828 | 4.61E-22 | 2.79E-20 |
| 132 | BIRC5    | 0.303887754 | 6.541910565 | 0.395918245 | 1.485747846 | 1.18E-21 | 7.05E-20 |
| 133 | NTF3     | 0.105145245 | 17.078456   | 0.388664029 | 1.475008908 | 6.90E-21 | 4.08E-19 |
| 134 | EDN1     | 0.090418325 | 19.57256716 | 0.381448395 | 1.464404089 | 3.83E-20 | 2.25E-18 |
| 135 | PRSS3    | 0.115032595 | 15.53674289 | 0.379009762 | 1.460837296 | 6.78E-20 | 3.95E-18 |
| 136 | FGF7     | 3.691962268 | 1.34082321  | 0.377325153 | 1.458378428 | 1.00E-19 | 5.81E-18 |
| 137 | CDC20    | 0.140219369 | 12.87009698 | 0.376283784 | 1.456860509 | 1.28E-19 | 7.34E-18 |
| 138 | FABP5    | 0.168516572 | 10.85056021 | 0.375650526 | 1.455938233 | 1.48E-19 | 8.43E-18 |
| 139 | SOX4     | 0.405714736 | 5.020968431 | 0.375150881 | 1.455210961 | 1.66E-19 | 9.39E-18 |
| 140 | RNLS     | 0.034951215 | 48.89055349 | 0.374661893 | 1.454499555 | 1.86E-19 | 1.04E-17 |
| 141 | PSG2     | 0.02020677  | 83.4908371  | 0.369525368 | 1.447047637 | 6.00E-19 | 3.35E-17 |
| 142 | PTPRN2   | 0.014997826 | 112.1110554 | 0.368881328 | 1.44611598  | 6.94E-19 | 3.85E-17 |
| 143 | CD9      | 0.129079518 | 13.79288757 | 0.36822389  | 1.445165562 | 8.05E-19 | 4.43E-17 |
| 144 | F2R      | 0.185104183 | 9.796868399 | 0.359397078 | 1.432465489 | 5.73E-18 | 3.13E-16 |
| 145 | QPRT     | 0.133140016 | 13.24544744 | 0.356698998 | 1.428605792 | 1.03E-17 | 5.61E-16 |
| 146 | HSPB6    | 1.595702818 | 1.898409161 | 0.35592977  | 1.427507291 | 1.22E-17 | 6.58E-16 |
| 147 | PARD3    | 0.109631032 | 15.8618686  | 0.354308252 | 1.425194438 | 1.73E-17 | 9.28E-16 |
| 148 | RSPO3    | 0.068329609 | 24.90950414 | 0.353620453 | 1.424214528 | 2.01E-17 | 1.07E-15 |
| 149 | HMOX1    | 0.483981839 | 4.258819863 | 0.353546417 | 1.424109088 | 2.04E-17 | 1.08E-15 |
| 150 | SOD3     | 0.688933888 | 3.240008457 | 0.350778886 | 1.420173271 | 3.70E-17 | 1.94E-15 |
| 151 | ELN      | 7.227647442 | 1.088493017 | 0.350664938 | 1.420011454 | 3.79E-17 | 1.97E-15 |
| 152 | CXCL6    | 0.065535144 | 25.81263998 | 0.348898867 | 1.417505826 | 5.51E-17 | 2.85E-15 |
| 153 | OLFML2B  | 0.103849539 | 16.57847121 | 0.347197773 | 1.415096565 | 7.89E-17 | 4.06E-15 |
| 154 | MELK     | 0.069647673 | 24.24816187 | 0.345148788 | 1.412200022 | 1.21E-16 | 6.20E-15 |
| 155 | SFRP1    | 0.073721145 | 22.85226913 | 0.340633567 | 1.405838001 | 3.10E-16 | 1.57E-14 |
| 156 | DIO2     | 0.020774291 | 78.76754897 | 0.338692677 | 1.40311207  | 4.62E-16 | 2.33E-14 |
| 157 | CH25H    | 0.234587879 | 7.748126239 | 0.338250288 | 1.402491486 | 5.05E-16 | 2.54E-14 |
| 158 | CLSPN    | 0.029854139 | 55.04411475 | 0.338219587 | 1.402448429 | 5.09E-16 | 2.54E-14 |
| 159 | THBS1    | 2.094028266 | 1.619964273 | 0.335853663 | 1.399134265 | 8.23E-16 | 4.08E-14 |
| 160 | SCUBE3   | 0.055452678 | 29.93490535 | 0.335144115 | 1.398141864 | 9.51E-16 | 4.68E-14 |
| 161 | CXCL8    | 0.024267492 | 67.1870836  | 0.33327778  | 1.395534897 | 1.39E-15 | 6.75E-14 |
| 162 | ABCB9    | 0.03072078  | 53.25093687 | 0.333267061 | 1.395519937 | 1.39E-15 | 6.75E-14 |
| 163 | CENPF    | 0.165418716 | 10.54680083 | 0.330200427 | 1.391246944 | 2.56E-15 | 1.24E-13 |
| 164 | OXTR     | 0.429100102 | 4.58233543  | 0.329688757 | 1.390535267 | 2.84E-15 | 1.36E-13 |
| 165 | SERPINE1 | 8.909273736 | 1.022112534 | 0.327837718 | 1.387963713 | 4.09E-15 | 1.95E-13 |
| 166 | TSTD1    | 0.121484465 | 14.01316681 | 0.327174702 | 1.387043776 | 4.66E-15 | 2.21E-13 |
| 167 | CDA      | 0.817749611 | 2.798419052 | 0.327124066 | 1.386973543 | 4.71E-15 | 2.22E-13 |
| 168 | TINAGL1  | 0.061301498 | 26.90830029 | 0.325842564 | 1.385197272 | 6.06E-15 | 2.84E-13 |
| 169 | PTN      | 0.190018603 | 9.245674226 | 0.32533994  | 1.384501213 | 6.68E-15 | 3.12E-13 |

Supplementary Table S3. HVGs of dermal fibroblasts (DFs) (FDR<0.01).

|     |          |             |             |             |             |          |          |
|-----|----------|-------------|-------------|-------------|-------------|----------|----------|
| 170 | SLC35E3  | 0.083911494 | 19.8522181  | 0.324224027 | 1.382957092 | 8.31E-15 | 3.85E-13 |
| 171 | ITGA2    | 0.130915095 | 13.0015075  | 0.322352591 | 1.380371397 | 1.19E-14 | 5.51E-13 |
| 172 | FABP3    | 0.03277007  | 49.41422912 | 0.322005935 | 1.379892966 | 1.28E-14 | 5.85E-13 |
| 173 | GADD45B  | 1.451515666 | 1.926042797 | 0.317787674 | 1.374084476 | 2.87E-14 | 1.30E-12 |
| 174 | PRAC2    | 0.014171007 | 112.4397922 | 0.315533824 | 1.370990983 | 4.40E-14 | 1.98E-12 |
| 175 | SNCG     | 0.169367111 | 10.16076545 | 0.314591161 | 1.369699211 | 5.26E-14 | 2.35E-12 |
| 176 | IL32     | 0.099013054 | 16.74945294 | 0.312182631 | 1.366404217 | 8.26E-14 | 3.68E-12 |
| 177 | IGFBP3   | 28.51558265 | 0.883686252 | 0.311164692 | 1.36501401  | 9.98E-14 | 4.42E-12 |
| 178 | PEG10    | 0.041429646 | 38.79169485 | 0.309986118 | 1.363406187 | 1.24E-13 | 5.47E-12 |
| 179 | AKAP12   | 0.29394755  | 6.169296568 | 0.308535735 | 1.361430159 | 1.62E-13 | 7.11E-12 |
| 180 | TLCD2    | 0.036029853 | 44.39536168 | 0.308050246 | 1.360769361 | 1.78E-13 | 7.73E-12 |
| 181 | FOXL1    | 0.03510938  | 45.52315351 | 0.307732174 | 1.360336606 | 1.88E-13 | 8.15E-12 |
| 182 | UBE2S    | 0.479143241 | 4.097679221 | 0.30695836  | 1.359284366 | 2.17E-13 | 9.34E-12 |
| 183 | HAPLN3   | 0.269736394 | 6.616396393 | 0.30363858  | 1.354779324 | 3.97E-13 | 1.70E-11 |
| 184 | GLIPR1   | 1.48971748  | 1.870787798 | 0.303326565 | 1.354356678 | 4.20E-13 | 1.79E-11 |
| 185 | ADRA2A   | 0.139272843 | 12.01415456 | 0.30115339  | 1.351416619 | 6.21E-13 | 2.63E-11 |
| 186 | COL8A1   | 1.043164307 | 2.312169555 | 0.30005338  | 1.349930865 | 7.56E-13 | 3.19E-11 |
| 187 | H2AFZ    | 5.080781173 | 1.125724167 | 0.29997078  | 1.349819365 | 7.67E-13 | 3.22E-11 |
| 188 | APOC1    | 0.025071802 | 62.56812627 | 0.294241122 | 1.342107477 | 2.11E-12 | 8.80E-11 |
| 189 | AP5B1    | 0.085960684 | 18.80933988 | 0.293357284 | 1.340921795 | 2.46E-12 | 1.02E-10 |
| 190 | FBN2     | 0.145242791 | 11.45646736 | 0.292672    | 1.340003197 | 2.77E-12 | 1.14E-10 |
| 191 | CYP26B1  | 0.031739858 | 49.483619   | 0.291999804 | 1.339102755 | 3.12E-12 | 1.28E-10 |
| 192 | MOK      | 0.135502087 | 12.16978042 | 0.288425989 | 1.334325591 | 5.76E-12 | 2.35E-10 |
| 193 | ANKRD50  | 0.064287642 | 24.71512943 | 0.286865683 | 1.332245258 | 7.52E-12 | 3.05E-10 |
| 194 | TM4SF1   | 0.038382798 | 40.82326148 | 0.286214688 | 1.331378255 | 8.39E-12 | 3.39E-10 |
| 195 | ACP5     | 0.019565084 | 79.16361884 | 0.284368235 | 1.328922197 | 1.15E-11 | 4.61E-10 |
| 196 | PCOLCE   | 1.65392343  | 1.726881177 | 0.280552289 | 1.323860764 | 2.17E-11 | 8.67E-10 |
| 197 | FGD6     | 0.011325748 | 135.5594504 | 0.27989376  | 1.32298925  | 2.42E-11 | 9.62E-10 |
| 198 | TSPAN13  | 0.203169474 | 8.31159056  | 0.279483358 | 1.322446404 | 2.59E-11 | 1.02E-09 |
| 199 | SUGCT    | 0.223126028 | 7.636663094 | 0.27904865  | 1.321871651 | 2.78E-11 | 1.10E-09 |
| 200 | F3       | 0.423599477 | 4.400846438 | 0.278738745 | 1.32146206  | 2.92E-11 | 1.15E-09 |
| 201 | SMC6     | 0.146483293 | 11.20680295 | 0.278537091 | 1.321195609 | 3.02E-11 | 1.18E-09 |
| 202 | DKK2     | 0.072207688 | 21.89806436 | 0.278005062 | 1.320492882 | 3.30E-11 | 1.28E-09 |
| 203 | MARCKSL1 | 0.403745773 | 4.571636102 | 0.277388351 | 1.319678771 | 3.65E-11 | 1.41E-09 |
| 204 | DUSP2    | 0.020755472 | 74.14233942 | 0.277281815 | 1.319538184 | 3.71E-11 | 1.43E-09 |
| 205 | LNPEP    | 0.087783657 | 18.08044178 | 0.27390267  | 1.315086799 | 6.43E-11 | 2.46E-09 |
| 206 | HSPA5    | 1.484076032 | 1.817724749 | 0.272423711 | 1.313143277 | 8.16E-11 | 3.11E-09 |
| 207 | HAS2     | 0.401293782 | 4.551979648 | 0.268052377 | 1.307415617 | 1.63E-10 | 6.20E-09 |
| 208 | HES1     | 0.189347505 | 8.746556689 | 0.266627286 | 1.305553758 | 2.04E-10 | 7.72E-09 |
| 209 | LMCD1    | 0.356363711 | 5.017831962 | 0.266456694 | 1.30533106  | 2.10E-10 | 7.89E-09 |
| 210 | SPEN     | 0.131445399 | 12.2476135  | 0.266399959 | 1.305257004 | 2.12E-10 | 7.92E-09 |
| 211 | TACSTD2  | 0.025985733 | 58.69119103 | 0.265604213 | 1.304218764 | 2.40E-10 | 8.93E-09 |
| 212 | DIRAS3   | 0.052260382 | 29.53453446 | 0.264020935 | 1.302155457 | 3.07E-10 | 1.14E-08 |

Supplementary Table S3. HVGs of dermal fibroblasts (DFs) (FDR<0.01).

|     |          |             |             |             |             |          |          |
|-----|----------|-------------|-------------|-------------|-------------|----------|----------|
| 213 | NREP     | 1.646107481 | 1.696230686 | 0.260108143 | 1.297070349 | 5.60E-10 | 2.07E-08 |
| 214 | PRSS23   | 4.534675476 | 1.11570063  | 0.258765683 | 1.295330251 | 6.87E-10 | 2.52E-08 |
| 215 | CKB      | 0.497295992 | 3.790121077 | 0.258522744 | 1.295015603 | 7.13E-10 | 2.60E-08 |
| 216 | DDX10    | 0.081904394 | 19.02104356 | 0.25825607  | 1.294670303 | 7.43E-10 | 2.70E-08 |
| 217 | MEDAG    | 0.158478357 | 10.2077192  | 0.258024887 | 1.294371032 | 7.69E-10 | 2.78E-08 |
| 218 | ASH2L    | 0.087908285 | 17.75341149 | 0.257005618 | 1.29305239  | 8.97E-10 | 3.23E-08 |
| 219 | BMF      | 0.028431746 | 53.2174937  | 0.256391683 | 1.292258785 | 9.84E-10 | 3.53E-08 |
| 220 | CCL2     | 0.066539194 | 23.1833027  | 0.256160991 | 1.291960705 | 1.02E-09 | 3.63E-08 |
| 221 | BCL2L12  | 0.194782542 | 8.434370814 | 0.255985087 | 1.291733465 | 1.05E-09 | 3.72E-08 |
| 222 | CXCL14   | 0.030339532 | 49.58742819 | 0.249698658 | 1.283638544 | 2.65E-09 | 9.38E-08 |
| 223 | ISG20    | 0.041612923 | 36.29904658 | 0.247891127 | 1.281320423 | 3.45E-09 | 1.21E-07 |
| 224 | CLEC2B   | 0.313376227 | 5.493591649 | 0.24772267  | 1.281104595 | 3.53E-09 | 1.24E-07 |
| 225 | STC2     | 1.731878476 | 1.629708012 | 0.246999184 | 1.280178069 | 3.92E-09 | 1.37E-07 |
| 226 | CD70     | 0.027096986 | 55.21040263 | 0.245764184 | 1.278598024 | 4.68E-09 | 1.63E-07 |
| 227 | CENPM    | 0.173555527 | 9.264518618 | 0.244657023 | 1.277183193 | 5.49E-09 | 1.90E-07 |
| 228 | LYPD3    | 0.012051306 | 122.7351416 | 0.242227074 | 1.274083472 | 7.75E-09 | 2.67E-07 |
| 229 | MLLT11   | 0.217742493 | 7.511447094 | 0.240630421 | 1.272050825 | 9.70E-09 | 3.33E-07 |
| 230 | ZNF232   | 0.031530738 | 47.30896563 | 0.240555784 | 1.271955887 | 9.81E-09 | 3.35E-07 |
| 231 | APBB1IP  | 0.185495077 | 8.670037336 | 0.239129533 | 1.270143051 | 1.20E-08 | 4.07E-07 |
| 232 | ID4      | 0.257786317 | 6.446371372 | 0.237811895 | 1.268470564 | 1.44E-08 | 4.87E-07 |
| 233 | TRIB3    | 0.449487861 | 4.024217765 | 0.237516507 | 1.268095929 | 1.50E-08 | 5.05E-07 |
| 234 | C11orf96 | 0.075896401 | 20.00946705 | 0.23576717  | 1.265879542 | 1.91E-08 | 6.40E-07 |
| 235 | PTGER1   | 0.081132684 | 18.73808675 | 0.234190877 | 1.263885716 | 2.36E-08 | 7.88E-07 |
| 236 | INHBA    | 0.49794337  | 3.695180398 | 0.23418518  | 1.263878515 | 2.37E-08 | 7.88E-07 |
| 237 | FAM43A   | 0.148655669 | 10.57435335 | 0.234108402 | 1.263781481 | 2.39E-08 | 7.93E-07 |
| 238 | TNNC1    | 0.013207848 | 111.0189044 | 0.232932601 | 1.262296399 | 2.81E-08 | 9.27E-07 |
| 239 | PALM     | 0.126713098 | 12.25597891 | 0.232748048 | 1.26206346  | 2.88E-08 | 9.46E-07 |
| 240 | RASSF2   | 0.013067793 | 111.9916993 | 0.231069458 | 1.25994675  | 3.61E-08 | 1.18E-06 |
| 241 | S1PR3    | 0.057154622 | 26.18896307 | 0.230817592 | 1.259629453 | 3.73E-08 | 1.22E-06 |
| 242 | NFATC2   | 0.013347371 | 109.6315276 | 0.230792429 | 1.259597756 | 3.75E-08 | 1.22E-06 |
| 243 | TACC3    | 0.053867568 | 27.73477726 | 0.230615245 | 1.259374596 | 3.84E-08 | 1.24E-06 |
| 244 | MFAP4    | 0.691311004 | 2.863999595 | 0.229949043 | 1.258535878 | 4.19E-08 | 1.35E-06 |
| 245 | SERPINF1 | 0.315328771 | 5.352253022 | 0.226987881 | 1.25481466  | 6.21E-08 | 1.99E-06 |
| 246 | FMN1     | 0.074682843 | 20.1322357  | 0.226379215 | 1.25405113  | 6.73E-08 | 2.15E-06 |
| 247 | TROAP    | 0.089270004 | 16.96159264 | 0.226066421 | 1.253658932 | 7.02E-08 | 2.23E-06 |
| 248 | TPX2     | 0.124926654 | 12.328757   | 0.225351506 | 1.252762993 | 7.70E-08 | 2.44E-06 |
| 249 | KLHL24   | 0.072160306 | 20.76258085 | 0.224126785 | 1.251229647 | 9.04E-08 | 2.85E-06 |
| 250 | MDFI     | 0.017366235 | 83.79994883 | 0.223210787 | 1.250084047 | 1.02E-07 | 3.20E-06 |
| 251 | CADM1    | 0.041970266 | 35.10254873 | 0.222740066 | 1.249495745 | 1.08E-07 | 3.39E-06 |
| 252 | CCDC152  | 0.022294408 | 65.40760292 | 0.222658973 | 1.249394424 | 1.09E-07 | 3.41E-06 |
| 253 | FOLR3    | 0.071019551 | 21.03422973 | 0.22176899  | 1.248282979 | 1.23E-07 | 3.81E-06 |
| 254 | DNAJC18  | 0.09327751  | 16.18489579 | 0.221095053 | 1.247441998 | 1.34E-07 | 4.14E-06 |
| 255 | PRC1     | 0.097386429 | 15.51240307 | 0.219705847 | 1.245710248 | 1.60E-07 | 4.93E-06 |

Supplementary Table S3. HVGs of dermal fibroblasts (DFs) (FDR<0.01).

|     |          |             |             |             |             |          |             |
|-----|----------|-------------|-------------|-------------|-------------|----------|-------------|
| 256 | SYNPO2   | 0.282964671 | 5.829257492 | 0.2187781   | 1.244555079 | 1.80E-07 | 5.52E-06    |
| 257 | CCDC8    | 0.079526316 | 18.78657713 | 0.217588292 | 1.243075179 | 2.09E-07 | 6.40E-06    |
| 258 | IER3     | 0.656830485 | 2.937427543 | 0.217491971 | 1.24295545  | 2.12E-07 | 6.45E-06    |
| 259 | C15orf48 | 0.011706787 | 123.0175543 | 0.215701298 | 1.240731714 | 2.65E-07 | 8.03E-06    |
| 260 | NPHP4    | 0.036557074 | 39.90539886 | 0.215681541 | 1.240707201 | 2.66E-07 | 8.03E-06    |
| 261 | PHACTR3  | 0.172064959 | 9.051694429 | 0.21351042  | 1.238016398 | 3.48E-07 | 1.05E-05    |
| 262 | HMGCS1   | 0.06395427  | 23.04620773 | 0.211921881 | 1.236051322 | 4.23E-07 | 1.27E-05    |
| 263 | NSG1     | 0.011743967 | 122.1535355 | 0.211804455 | 1.235906186 | 4.29E-07 | 1.28E-05    |
| 264 | BAALC    | 1.149545545 | 1.989411415 | 0.211315454 | 1.235301974 | 4.56E-07 | 1.36E-05    |
| 265 | PLXNA2   | 0.07954308  | 18.65816669 | 0.210931905 | 1.234828267 | 4.78E-07 | 1.42E-05    |
| 266 | SRGN     | 0.056385716 | 26.00677597 | 0.210685042 | 1.23452347  | 4.92E-07 | 1.46E-05    |
| 267 | CARD9    | 0.078816404 | 18.81542282 | 0.210514271 | 1.234312669 | 5.03E-07 | 1.48E-05    |
| 268 | DDIT4    | 0.552915277 | 3.314827548 | 0.207621007 | 1.230746636 | 7.14E-07 | 2.09E-05    |
| 269 | ACKR4    | 0.030581923 | 47.14009294 | 0.206917196 | 1.229880729 | 7.77E-07 | 2.27E-05    |
| 270 | PAPPA    | 0.447888789 | 3.91246973  | 0.206471513 | 1.229332714 | 8.19E-07 | 2.39E-05    |
| 271 | GTSE1    | 0.046361089 | 31.31503429 | 0.205806135 | 1.228515015 | 8.87E-07 | 2.57E-05    |
| 272 | CHRNE    | 0.025111775 | 57.17506192 | 0.205675281 | 1.228354269 | 9.01E-07 | 2.61E-05    |
| 273 | KRT8     | 0.012969203 | 110.0025082 | 0.205626263 | 1.22829406  | 9.06E-07 | 2.61E-05    |
| 274 | CHN1     | 0.291270692 | 5.606029773 | 0.204865813 | 1.227360358 | 9.92E-07 | 2.85E-05    |
| 275 | VTA1     | 0.133812303 | 11.32232535 | 0.204527844 | 1.226945618 | 1.03E-06 | 2.95E-05    |
| 276 | TMEM233  | 0.021969195 | 65.15712111 | 0.204296574 | 1.226661896 | 1.06E-06 | 3.02E-05    |
| 277 | PDE1A    | 0.045656177 | 31.71028621 | 0.203389438 | 1.225549651 | 1.18E-06 | 3.35E-05    |
| 278 | TUBB4B   | 1.054216628 | 2.083041949 | 0.202488386 | 1.224445864 | 1.31E-06 | 3.71E-05    |
| 279 | YLPM1    | 0.134378388 | 11.25271291 | 0.202303944 | 1.224220046 | 1.34E-06 | 3.78E-05    |
| 280 | ANGPT1   | 0.043695444 | 33.04394144 | 0.201699368 | 1.223480136 | 1.44E-06 | 4.04E-05    |
| 281 | TUBA1A   | 2.198893396 | 1.38431163  | 0.201605235 | 1.223364972 | 1.46E-06 | 4.07E-05    |
| 282 | IL7R     | 0.152825259 | 9.974873398 | 0.201376106 | 1.223084695 | 1.49E-06 | 4.17E-05    |
| 283 | SYNGR2   | 0.049873962 | 29.02356588 | 0.201051975 | 1.222688319 | 1.55E-06 | 4.32E-05    |
| 284 | LBH      | 0.859254652 | 2.383239138 | 0.200886837 | 1.222486424 | 1.58E-06 | 4.38E-05    |
| 285 | MSX1     | 0.380201522 | 4.447079835 | 0.199950126 | 1.221341843 | 1.76E-06 | 4.87E-05    |
| 286 | KCTD5    | 0.109512236 | 13.60341401 | 0.199685918 | 1.221019198 | 1.82E-06 | 5.00E-05    |
| 287 | SCARA3   | 0.436497229 | 3.964406694 | 0.198758062 | 1.219886793 | 2.02E-06 | 5.55E-05    |
| 288 | NGFR     | 0.040999591 | 35.05988692 | 0.198624433 | 1.219723791 | 2.05E-06 | 5.62E-05    |
| 289 | RIPK4    | 0.014361838 | 98.68651244 | 0.198340948 | 1.219378067 | 2.12E-06 | 5.78E-05    |
| 290 | IL33     | 0.01290407  | 109.4117776 | 0.195240935 | 1.215603833 | 3.02E-06 | 8.20E-05    |
| 291 | TK1      | 0.445749207 | 3.880580784 | 0.194410444 | 1.214594704 | 3.32E-06 | 8.97E-05    |
| 292 | CYGB     | 0.263815263 | 6.040335014 | 0.193082875 | 1.212983315 | 3.85E-06 | 0.000103747 |
| 293 | CYYR1    | 0.01539492  | 91.61694224 | 0.192932617 | 1.212801068 | 3.91E-06 | 0.000105144 |
| 294 | SBSN     | 0.311883665 | 5.219805791 | 0.192500724 | 1.212277381 | 4.11E-06 | 0.000109954 |
| 295 | MAFB     | 0.099833845 | 14.71393232 | 0.190457048 | 1.209802409 | 5.15E-06 | 0.000137402 |
| 296 | PTGER3   | 0.020606366 | 68.43541039 | 0.190053193 | 1.209313923 | 5.38E-06 | 0.00014316  |
| 297 | CXCL2    | 0.023234296 | 60.74358111 | 0.189486843 | 1.208629221 | 5.73E-06 | 0.000151826 |
| 298 | WNT16    | 0.055352563 | 25.8994856  | 0.188586153 | 1.207541112 | 6.32E-06 | 0.00016697  |

Supplementary Table S3. HVGs of dermal fibroblasts (DFs) (FDR<0.01).

|     |          |             |             |             |             |          |             |
|-----|----------|-------------|-------------|-------------|-------------|----------|-------------|
| 299 | PAN3     | 0.04238924  | 33.57316549 | 0.18791094  | 1.206726039 | 6.80E-06 | 0.000179102 |
| 300 | TRIP13   | 0.061989209 | 23.18804811 | 0.187850333 | 1.206652905 | 6.85E-06 | 0.000179687 |
| 301 | TNFAIP6  | 0.084149421 | 17.27285442 | 0.187756009 | 1.206539094 | 6.92E-06 | 0.000180938 |
| 302 | C11orf87 | 0.016502345 | 85.02835315 | 0.187188315 | 1.205854344 | 7.36E-06 | 0.000191784 |
| 303 | TOP2A    | 0.093663657 | 15.57931746 | 0.186898416 | 1.205504819 | 7.59E-06 | 0.000197241 |
| 304 | SLC20A1  | 0.17756043  | 8.550126439 | 0.185295741 | 1.203574333 | 9.02E-06 | 0.000233583 |
| 305 | WNT5B    | 0.733158978 | 2.623953122 | 0.185168942 | 1.203421731 | 9.14E-06 | 0.000236004 |
| 306 | CD163L1  | 0.015319722 | 91.32340984 | 0.184866251 | 1.203057522 | 9.44E-06 | 0.000242976 |
| 307 | TNFRSF19 | 0.082046317 | 17.64143841 | 0.18462045  | 1.202761845 | 9.69E-06 | 0.00024863  |
| 308 | DCUN1D1  | 0.108266795 | 13.53138378 | 0.183558796 | 1.201485606 | 1.09E-05 | 0.000277464 |
| 309 | CCNB1    | 0.099293247 | 14.68250186 | 0.183159227 | 1.201005626 | 1.13E-05 | 0.000288535 |
| 310 | TSPAN2   | 0.152215598 | 9.806270861 | 0.180628576 | 1.197970142 | 1.48E-05 | 0.000375271 |
| 311 | NAT10    | 0.064374487 | 22.18658788 | 0.180243826 | 1.197509312 | 1.54E-05 | 0.000389387 |
| 312 | CST6     | 0.095561053 | 15.17851192 | 0.179939116 | 1.197144474 | 1.59E-05 | 0.000400655 |
| 313 | MKI67    | 0.115241743 | 12.70582231 | 0.179575131 | 1.196708811 | 1.65E-05 | 0.000414776 |
| 314 | SMIM3    | 0.431650312 | 3.921690811 | 0.178834443 | 1.195822751 | 1.78E-05 | 0.000446433 |
| 315 | SLC7A11  | 0.37105965  | 4.441123399 | 0.178287204 | 1.19516853  | 1.88E-05 | 0.000470884 |
| 316 | FECH     | 0.106148586 | 13.69941803 | 0.177196708 | 1.193865913 | 2.11E-05 | 0.000525054 |
| 317 | BDKRB1   | 0.099025557 | 14.61648052 | 0.176086745 | 1.192541502 | 2.36E-05 | 0.000586223 |
| 318 | CNN1     | 0.184611899 | 8.167998092 | 0.175131142 | 1.191402449 | 2.60E-05 | 0.000642396 |
| 319 | PTHLH    | 0.021746746 | 63.923706   | 0.175123822 | 1.191393728 | 2.60E-05 | 0.000642396 |
| 320 | MARCH4   | 0.229771208 | 6.702821376 | 0.174839833 | 1.191055433 | 2.68E-05 | 0.000659065 |
| 321 | LYPD6B   | 0.116530975 | 12.51222947 | 0.174707101 | 1.190897353 | 2.71E-05 | 0.000665896 |
| 322 | LMOD1    | 0.040578147 | 34.53418484 | 0.173401122 | 1.189343081 | 3.10E-05 | 0.000757078 |
| 323 | SYT1     | 0.026920686 | 51.64137731 | 0.172499976 | 1.188271792 | 3.39E-05 | 0.000825924 |
| 324 | GXYLT1   | 0.047761233 | 29.40948397 | 0.172059991 | 1.187749086 | 3.54E-05 | 0.000860284 |
| 325 | NRG1     | 0.392909775 | 4.207784755 | 0.171961338 | 1.187631916 | 3.57E-05 | 0.00086611  |
| 326 | LURAP1   | 0.06848831  | 20.72392659 | 0.171899229 | 1.187558156 | 3.60E-05 | 0.000868818 |
| 327 | SLC4A7   | 0.09412737  | 15.259883   | 0.170887688 | 1.186357499 | 3.98E-05 | 0.000957525 |
| 328 | IL6      | 0.016567355 | 83.29648005 | 0.17050765  | 1.185906725 | 4.13E-05 | 0.000991119 |
| 329 | GALE     | 0.089054176 | 16.08010328 | 0.170385408 | 1.185761765 | 4.18E-05 | 0.001000105 |
| 330 | PHF7     | 0.038953125 | 35.80736009 | 0.16957165  | 1.184797235 | 4.53E-05 | 0.001080142 |
| 331 | ANG      | 0.104960323 | 13.71318388 | 0.16753585  | 1.182387678 | 5.52E-05 | 0.001313363 |
| 332 | ALDH1A3  | 0.295098172 | 5.339018349 | 0.167375316 | 1.18219788  | 5.61E-05 | 0.001329956 |
| 333 | LAPTM5   | 0.052374006 | 26.7526322  | 0.167207224 | 1.181999179 | 5.70E-05 | 0.001347737 |
| 334 | FAH      | 0.281768355 | 5.55323444  | 0.166580239 | 1.181258314 | 6.05E-05 | 0.001427599 |
| 335 | FGF9     | 0.055088853 | 25.41140076 | 0.164920218 | 1.179299028 | 7.10E-05 | 0.001669057 |
| 336 | WDYHV1   | 0.161161971 | 9.145516999 | 0.163633968 | 1.17778313  | 8.02E-05 | 0.001880639 |
| 337 | COL3A1   | 8.066576234 | 0.88304751  | 0.163387754 | 1.177493179 | 8.21E-05 | 0.001919309 |
| 338 | WFDC1    | 0.015015876 | 91.14783033 | 0.163067387 | 1.177116009 | 8.46E-05 | 0.001972489 |
| 339 | NPW      | 0.133394711 | 10.89161623 | 0.162824376 | 1.176829992 | 8.66E-05 | 0.002012316 |
| 340 | ADM      | 3.420797448 | 1.110667214 | 0.162418201 | 1.17635209  | 9.00E-05 | 0.00208466  |
| 341 | PIP5KL1  | 0.138973328 | 10.4742569  | 0.161982361 | 1.175839501 | 9.37E-05 | 0.002165441 |

Supplementary Table S3. HVGs of dermal fibroblasts (DFs) (FDR<0.01).

|     |          |             |             |             |             |             |             |
|-----|----------|-------------|-------------|-------------|-------------|-------------|-------------|
| 342 | RASGRP2  | 0.034555599 | 39.96585822 | 0.161924006 | 1.175770886 | 9.42E-05    | 0.002170995 |
| 343 | HEXIM2   | 0.068622644 | 20.43899049 | 0.15994598  | 1.173447479 | 0.000113318 | 0.002603027 |
| 344 | FLNC     | 1.266956234 | 1.780526176 | 0.15986691  | 1.173354698 | 0.000114151 | 0.002614587 |
| 345 | RCAN1    | 0.269148124 | 5.719308284 | 0.156023358 | 1.168853505 | 0.000162293 | 0.003706551 |
| 346 | TBC1D1   | 0.123779248 | 11.59631391 | 0.155443805 | 1.168176288 | 0.000171015 | 0.003894517 |
| 347 | TNXB     | 0.157796417 | 9.248031777 | 0.155310304 | 1.168020346 | 0.000173085 | 0.003926657 |
| 348 | PINLYP   | 0.082589632 | 17.02346885 | 0.155289015 | 1.16799548  | 0.000173417 | 0.003926657 |
| 349 | PPFIA4   | 0.017581163 | 77.27701587 | 0.154363167 | 1.166914594 | 0.000188454 | 0.004254989 |
| 350 | LHB      | 0.01753279  | 77.48179196 | 0.154279547 | 1.166817022 | 0.000189871 | 0.004274787 |
| 351 | PRELP    | 0.090606724 | 15.56359437 | 0.154240785 | 1.166771794 | 0.000190531 | 0.004277492 |
| 352 | CEP55    | 0.053275548 | 25.95466367 | 0.153531243 | 1.165944214 | 0.000202993 | 0.004544408 |
| 353 | APOD     | 0.137441197 | 10.47258314 | 0.151488122 | 1.163564481 | 0.000243243 | 0.005430138 |
| 354 | TMEM200A | 0.088259236 | 15.90993514 | 0.151179524 | 1.163205462 | 0.00024993  | 0.005563754 |
| 355 | ASPM     | 0.058198699 | 23.739392   | 0.150184919 | 1.162049108 | 0.000272663 | 0.00605281  |
| 356 | ERRFI1   | 0.083275615 | 16.80255154 | 0.150152663 | 1.162011625 | 0.000273431 | 0.006052912 |
| 357 | ADRA1D   | 0.017415095 | 77.65887664 | 0.149888337 | 1.161704516 | 0.000279804 | 0.006176733 |
| 358 | HLA-DPB1 | 0.20231605  | 7.320471049 | 0.148703362 | 1.160328741 | 0.000310102 | 0.006826559 |
| 359 | MRM1     | 0.023915047 | 56.6742718  | 0.148670372 | 1.160290462 | 0.000310988 | 0.006827087 |
| 360 | FAM131C  | 0.022035124 | 61.39036733 | 0.147710075 | 1.159176773 | 0.000337812 | 0.007395471 |
| 361 | PLAU     | 0.061193863 | 22.55213962 | 0.147535188 | 1.158974066 | 0.000342922 | 0.007486657 |
| 362 | NUDCD1   | 0.042133059 | 32.43067195 | 0.147358451 | 1.15876925  | 0.000348159 | 0.007580099 |
| 363 | CNEP1R1  | 0.049965515 | 27.42567647 | 0.146210608 | 1.157439929 | 0.00038401  | 0.008337742 |
| 364 | ECM2     | 0.038428779 | 35.41499647 | 0.14527153  | 1.156353512 | 0.000415846 | 0.00900432  |



*Supplementary Table S4. Significantly enriched motifs found in HVGs.*

**Supplementary Table S4. Significantly enriched motifs found in HVGs.**

Results were generated by GREAT (version 3.0.0) using hg19 human genome reference with association rule: Basal+extension: 5000 bp upstream, 1000 bp downstream, 1000000 bp max extension, curated regulatory domains included.

| Cell type | # Term Name                                                                                                                                                                  | Binom Rank | Binom Raw P-Value | Binom FDR Q-Val | Binom Fold Enrichment | Binom Obs. Region Hits | Binom Region Set Cov. |
|-----------|------------------------------------------------------------------------------------------------------------------------------------------------------------------------------|------------|-------------------|-----------------|-----------------------|------------------------|-----------------------|
| LCL       | Motif NNNNKGGRAANTCCCN (no known TF)                                                                                                                                         | 1          | 3.35E-06          | 0.002058        | 2.685652              | 28                     | 0.066038              |
| LCL       | Motif GGGAMTTYCC matches NFKB; RELA: v-rel reticuloendotheliosis viral oncogene homolog A, nuclear factor of kappa light polypeptide gene enhancer in B-cells 3, p65 (avian) | 2          | 2.51E-05          | 0.007732        | 2.500147              | 26                     | 0.061321              |
| LCL       | Motif NGGGACTTTCCA (no known TF)                                                                                                                                             | 3          | 7.05E-05          | 0.014461        | 2.346414              | 26                     | 0.061321              |
| LCL       | Motif SRTGAGTCANC matches BACH2: BTB and CNC homology 1, basic leucine zipper transcription factor 2                                                                         | 5          | 0.000357          | 0.043963        | 2.236156              | 23                     | 0.054245              |
| LAEC      | Motif STATAAAWRNNNNNN matches TAF<br>TATA                                                                                                                                    | 1          | 1.89E-05          | 0.011642        | 2.441259              | 28                     | 0.06422               |
| LAEC      | Motif NNNNKGGRAANTCCCN (no known TF)                                                                                                                                         | 3          | 0.000107          | 0.022002        | 2.331906              | 25                     | 0.057339              |
| LAEC      | Motif NGGGGAMTTTCCNN (no known TF)                                                                                                                                           | 4          | 0.000218          | 0.033477        | 2.1836                | 26                     | 0.059633              |
| LAEC      | Motif GGGAMTTYCC matches NFKB; RELA: v-rel reticuloendotheliosis viral oncogene homolog A, nuclear factor of kappa light polypeptide gene enhancer in B-cells 3, p65 (avian) | 5          | 0.000256          | 0.031449        | 2.24431               | 24                     | 0.055046              |
| LAEC      | Motif TTGCWCAAY matches CEBPB: CCAAT/enhancer binding protein (C/EBP), beta                                                                                                  | 6          | 0.000471          | 0.048241        | 3.215633              | 12                     | 0.027523              |

Supplementary Table S5. HVGs of induced pluripotent stem cell (iPSCs) (FDR<0.01)

Supplementary Table S5. HVGs of induced pluripotent stem cell (iPSCs) (FDR<0.01)

| ID | genes          | u           | cv2         | residualcv2 | fitratio    | pval      | fdr       |
|----|----------------|-------------|-------------|-------------|-------------|-----------|-----------|
| 1  | TAGLN          | 1.358291551 | 5.316720491 | 1.245047724 | 3.473100546 | 2.86E-269 | 2.53E-265 |
| 2  | LEFTY1         | 1.449540248 | 3.483336718 | 0.868531795 | 2.38340895  | 2.61E-114 | 1.15E-110 |
| 3  | LINC00458      | 0.084785095 | 38.9765791  | 0.768449702 | 2.156420566 | 1.06E-86  | 3.12E-83  |
| 4  | CSAG1          | 0.025124373 | 112.5062851 | 0.629075088 | 1.875874757 | 5.87E-56  | 1.30E-52  |
| 5  | DHRS2          | 0.061374347 | 45.88767746 | 0.615139004 | 1.849913727 | 2.46E-53  | 4.34E-50  |
| 6  | ACTC1          | 0.106228014 | 26.79126118 | 0.613042192 | 1.84603887  | 6.00E-53  | 8.83E-50  |
| 7  | PTPN5          | 0.010049445 | 275.0743101 | 0.611091422 | 1.842441182 | 1.37E-52  | 1.73E-49  |
| 8  | UBE2C          | 5.085267443 | 1.32896039  | 0.60791611  | 1.836600136 | 5.23E-52  | 5.77E-49  |
| 9  | KPNA2          | 3.206429901 | 1.391359031 | 0.440113907 | 1.552884093 | 1.10E-26  | 1.08E-23  |
| 10 | ANXA3          | 0.355106386 | 7.184182196 | 0.436654241 | 1.547520916 | 2.87E-26  | 2.54E-23  |
| 11 | HIST1H4C       | 6.549518143 | 1.00178354  | 0.420596334 | 1.522869424 | 2.20E-24  | 1.77E-21  |
| 12 | RP11-393M11.2  | 0.009718893 | 232.8120879 | 0.410930711 | 1.508220849 | 2.73E-23  | 2.01E-20  |
| 13 | MT1G           | 0.617528499 | 4.28481023  | 0.40703696  | 1.502359632 | 7.36E-23  | 5.01E-20  |
| 14 | LEFTY2         | 0.229302265 | 10.43600344 | 0.405975711 | 1.5007661   | 9.64E-23  | 6.08E-20  |
| 15 | ADM            | 0.510891112 | 4.915200814 | 0.381067783 | 1.463846826 | 4.19E-20  | 2.47E-17  |
| 16 | BBS9           | 0.254034066 | 9.014193821 | 0.355303548 | 1.426613635 | 1.40E-17  | 7.72E-15  |
| 17 | ZBTB26         | 0.021019308 | 101.6929439 | 0.350797447 | 1.420199631 | 3.68E-17  | 1.91E-14  |
| 18 | HIST1H2BK      | 0.932271558 | 2.885895107 | 0.349759093 | 1.418725726 | 4.59E-17  | 2.25E-14  |
| 19 | ZNRF2          | 0.027444108 | 77.82998069 | 0.348244938 | 1.416579182 | 6.33E-17  | 2.94E-14  |
| 20 | RP11-390B4.5   | 0.031742452 | 66.30285643 | 0.332231339 | 1.394075316 | 1.71E-15  | 7.55E-13  |
| 21 | ID3            | 6.616024676 | 0.896206741 | 0.312726887 | 1.367148094 | 7.46E-14  | 3.14E-11  |
| 22 | MYL9           | 0.71092063  | 3.446197116 | 0.307553036 | 1.360092941 | 1.95E-13  | 7.81E-11  |
| 23 | MIR205HG       | 0.456579216 | 5.008210733 | 0.301108132 | 1.351355458 | 6.26E-13  | 2.40E-10  |
| 24 | PKIB           | 0.890497935 | 2.847567571 | 0.300049754 | 1.34992597  | 7.56E-13  | 2.78E-10  |
| 25 | STC1           | 0.05657726  | 36.20551005 | 0.298122856 | 1.347327304 | 1.07E-12  | 3.77E-10  |
| 26 | RAB33B         | 0.031898313 | 63.36805048 | 0.291812008 | 1.338851301 | 3.22E-12  | 1.09E-09  |
| 27 | H1FO           | 0.705648021 | 3.404457754 | 0.289180828 | 1.335333173 | 5.06E-12  | 1.66E-09  |
| 28 | MT1H           | 0.186388053 | 11.28910528 | 0.28896598  | 1.33504631  | 5.25E-12  | 1.66E-09  |
| 29 | TRDN           | 0.109527566 | 18.50747403 | 0.272810875 | 1.313651777 | 7.67E-11  | 2.34E-08  |
| 30 | HIST1H3D       | 0.019917811 | 98.93258866 | 0.269765438 | 1.309657219 | 1.25E-10  | 3.67E-08  |
| 31 | RP11-277P12.10 | 0.043369923 | 45.61356536 | 0.267012968 | 1.306057383 | 1.92E-10  | 5.49E-08  |
| 32 | HIST1H2AC      | 0.658554839 | 3.523569842 | 0.265804971 | 1.304480623 | 2.33E-10  | 6.38E-08  |
| 33 | RTTN           | 0.018073921 | 108.5204427 | 0.265647409 | 1.304275103 | 2.38E-10  | 6.38E-08  |
| 34 | MEGF10         | 0.04095088  | 48.15885286 | 0.264605919 | 1.302917419 | 2.80E-10  | 7.28E-08  |
| 35 | C19orf73       | 0.054664903 | 36.1849328  | 0.263709363 | 1.301749805 | 3.22E-10  | 8.13E-08  |
| 36 | CDK1           | 1.105159503 | 2.313709115 | 0.260495829 | 1.297573302 | 5.28E-10  | 1.30E-07  |
| 37 | HIST1H1D       | 0.320603237 | 6.605609406 | 0.259506513 | 1.296290227 | 6.14E-10  | 1.47E-07  |
| 38 | FAM149A        | 0.042287502 | 46.2284187  | 0.255434844 | 1.291022893 | 1.14E-09  | 2.64E-07  |
| 39 | RP11-509E16.1  | 0.037459502 | 52.04248952 | 0.2540395   | 1.289222727 | 1.40E-09  | 3.17E-07  |
| 40 | RAB40B         | 0.035136909 | 55.27744009 | 0.250995366 | 1.285304128 | 2.19E-09  | 4.84E-07  |

Supplementary Table S5. HVGs of induced pluripotent stem cell (iPSCs) (FDR<0.01)

|    |               |             |             |             |             |          |          |
|----|---------------|-------------|-------------|-------------|-------------|----------|----------|
| 41 | LOH12CR2      | 0.015353552 | 125.4799757 | 0.248508871 | 1.282112196 | 3.15E-09 | 6.79E-07 |
| 42 | PIANP         | 0.052738739 | 36.7410168  | 0.243633162 | 1.275876205 | 6.35E-09 | 1.34E-06 |
| 43 | GAS7          | 0.021426679 | 89.14497962 | 0.238182704 | 1.268941012 | 1.37E-08 | 2.81E-06 |
| 44 | TOP2A         | 0.937896996 | 2.5569175   | 0.233469416 | 1.262974201 | 2.61E-08 | 5.24E-06 |
| 45 | CBR3          | 0.48845566  | 4.406397665 | 0.232516721 | 1.261771545 | 2.97E-08 | 5.83E-06 |
| 46 | PYY           | 0.019033068 | 99.56366965 | 0.230940122 | 1.259783804 | 3.67E-08 | 7.05E-06 |
| 47 | NPHP3         | 0.05198402  | 36.78872646 | 0.230730365 | 1.259519583 | 3.78E-08 | 7.10E-06 |
| 48 | PDLIM3        | 0.064477328 | 29.74121303 | 0.229923    | 1.258503101 | 4.21E-08 | 7.75E-06 |
| 49 | AMER1         | 0.077281659 | 24.61017297 | 0.218090273 | 1.243699336 | 1.96E-07 | 3.54E-05 |
| 50 | RP11-152N13.5 | 0.062086252 | 30.42922975 | 0.215677898 | 1.240702682 | 2.66E-07 | 4.69E-05 |
| 51 | NLGN2         | 0.118080454 | 16.19799415 | 0.212336345 | 1.236563727 | 4.02E-07 | 6.97E-05 |
| 52 | AC144652.1    | 0.034723198 | 53.78102082 | 0.21182458  | 1.23593106  | 4.28E-07 | 7.28E-05 |
| 53 | PHLDA3        | 0.356382971 | 5.688520749 | 0.206478815 | 1.22934169  | 8.18E-07 | 1.36E-04 |
| 54 | SCARA3        | 0.138605217 | 13.79482015 | 0.206323803 | 1.229151142 | 8.34E-07 | 1.36E-04 |
| 55 | RP11-563N4.1  | 0.084197692 | 22.31960343 | 0.204166493 | 1.226502341 | 1.08E-06 | 1.73E-04 |
| 56 | DDHD1         | 0.074228873 | 25.15644649 | 0.200598692 | 1.222134221 | 1.64E-06 | 2.58E-04 |
| 57 | HIST1H2BD     | 0.170575644 | 11.24073375 | 0.20033741  | 1.221814941 | 1.69E-06 | 2.61E-04 |
| 58 | LRRN2         | 0.0515808   | 35.95400351 | 0.200106545 | 1.2215329   | 1.73E-06 | 2.64E-04 |
| 59 | SPP1          | 1.172423656 | 2.078221922 | 0.19768931  | 1.218583733 | 2.29E-06 | 3.42E-04 |
| 60 | SOCS1         | 0.785849162 | 2.842336206 | 0.197408123 | 1.218241131 | 2.36E-06 | 3.48E-04 |
| 61 | CA8           | 0.085442136 | 21.79835054 | 0.194858606 | 1.215139161 | 3.15E-06 | 4.57E-04 |
| 62 | HEXIM1        | 0.119661433 | 15.67568642 | 0.192421161 | 1.212180933 | 4.14E-06 | 5.90E-04 |
| 63 | RECQL5        | 0.050193579 | 36.6431141  | 0.192221665 | 1.211939131 | 4.24E-06 | 5.94E-04 |
| 64 | DIAPH2        | 0.805863445 | 2.765084983 | 0.190326236 | 1.209644163 | 5.22E-06 | 7.21E-04 |
| 65 | SPATA5L1      | 0.065481422 | 28.1465296  | 0.189983226 | 1.209229314 | 5.42E-06 | 7.37E-04 |
| 66 | RBBP8NL       | 0.021450769 | 84.12688105 | 0.18136163  | 1.19884864  | 1.37E-05 | 1.83E-03 |
| 67 | CHKB-AS1      | 0.048275848 | 37.57218191 | 0.178847104 | 1.195837891 | 1.78E-05 | 2.34E-03 |
| 68 | MT1E          | 0.348290947 | 5.642531497 | 0.177502954 | 1.194231585 | 2.04E-05 | 2.65E-03 |
| 69 | TCEAL7        | 0.07176915  | 25.37528562 | 0.176253232 | 1.19274006  | 2.32E-05 | 2.97E-03 |
| 70 | SNURF         | 0.031051185 | 57.830128   | 0.173686899 | 1.189683017 | 3.01E-05 | 3.80E-03 |
| 71 | MED14-AS1     | 0.031294699 | 57.35577271 | 0.173192992 | 1.189095569 | 3.16E-05 | 3.93E-03 |
| 72 | ARHGAP22      | 0.056162387 | 32.15464327 | 0.172225705 | 1.187945928 | 3.48E-05 | 4.27E-03 |
| 73 | CTGF          | 0.175639565 | 10.59863384 | 0.169388837 | 1.184580658 | 4.61E-05 | 5.53E-03 |
| 74 | ZNF329        | 0.044877329 | 39.99652234 | 0.169339629 | 1.184522368 | 4.63E-05 | 5.53E-03 |
| 75 | FGF8          | 0.56474581  | 3.638032498 | 0.167006696 | 1.181762178 | 5.81E-05 | 6.84E-03 |
| 76 | EVC2          | 0.027584883 | 64.58996816 | 0.166853679 | 1.181581362 | 5.90E-05 | 6.85E-03 |
| 77 | CTA-29F11.1   | 0.408061265 | 4.834980168 | 0.165950288 | 1.180514414 | 6.43E-05 | 7.38E-03 |
| 78 | EME1          | 0.057503737 | 31.14927497 | 0.163683664 | 1.177841663 | 7.98E-05 | 9.04E-03 |
| 79 | TBC1D31       | 0.085827082 | 21.03369336 | 0.163537279 | 1.177669257 | 8.09E-05 | 9.05E-03 |
